# Supplementary material for: Water-assisted self-photoredox of 2-(1-hydroxyethyl)-9,10-anthraquinone through a triplet excited state intra-molecular proton transfer pathway
Source: Royal Society of Chemistry journal article supplement (doi:10.1039/c5cp03442f), 2015-01-01
Supplement: c5cp03442f1.pdf [file c5cp03442f1.pdf]

*Electronic Supporting Information for:*

## **Water Assisted Self-Photoredox of 2-(1-Hydroxyethyl)-9,10-Anthraquinone Through a Triplet Excited State Intra-Molecular Proton Transfer Pathway**

*Jingze Dai,<sup>[a]</sup> Juan Han,<sup>[a]</sup> Xuebo Chen,<sup>\*[a]</sup> Weihai Fang,<sup>[a]</sup> Jiani Ma,<sup>[b]</sup> and David Lee Phillips<sup>\*[c]</sup>*

<sup>[a]</sup> Key Laboratory of Theoretical and Computational Photochemistry of Ministry of Education, Department of Chemistry, Beijing Normal University, Xin-wai-da-jie 19, Beijing 100875, P. R. China.

<sup>[b]</sup> Key Laboratory of Synthetic and Natural Functional Molecule Chemistry of Ministry of Education, College of Chemistry and Materials Science, Northwest University, Xi'an, P. R. China

<sup>[c]</sup> Department of Chemistry, The University of Hong Kong Pokfulam Road, Hong Kong, P.R. China

Emails: xuebochen@bnu.edu.cn(XC); phillips@hku.hk (DLP)

### **Contents**

Section 1. Computational details

1.1 Simulation Model Setup

1.2 Molecular orbitals

Section 2. Figures (S2-1 to S2-3)

Section 3. Tables (S3-1 to S3-5)

Section 4. Cartesian Coordinates (S4-1 to S4-4)

## Section 1. Computational details

### 1.1 Simulation Model Setup

**Table S1-1.** The stabilization energies (S. E.) in kcal/mol for the energetic difference between hydrogen bonding and supra-molecular forms of 2-HEAQ· $n$ H<sub>2</sub>O ( $n=1-6$ ) complexes (see Figure S1-1 for schematic structure) were obtained at the B3LYP/6-31G\* level of theory. The  $n(\text{O11} \dots \text{H15})/n(\text{O12} \dots \text{H14})$  represents the number of water molecules between O11 and H15 or O12 and H14, respectively, which can form the hydrogen bonds between water wires and 2-HEAQ.

|                          | n(O11 ... H15) | n(O12 ... H14) | S. E. |
|--------------------------|----------------|----------------|-------|
| 2-HEAQ·1H <sub>2</sub> O | 1              | 0              | 9.5   |
| 2-HEAQ·2H <sub>2</sub> O | 2              | 0              | 14.6  |
| 2-HEAQ·3H <sub>2</sub> O | 3              | 0              | 14.4  |
| 2-HEAQ·4H <sub>2</sub> O | 2              | 1              | 22.1  |
| 2-HEAQ·5H <sub>2</sub> O | 2              | 2              | 24.6  |
| 2-HEAQ·6H <sub>2</sub> O | 2              | 3              | 33.9  |
| 2-HEAQ·6H <sub>2</sub> O | 2              | 4              | 33.9  |

**Figure S1-1.** Schematic minimum structures for the 2-HEAQ· $n$ H<sub>2</sub>O ( $n=1-6$ ) and 2-HEAQ·5H<sub>2</sub>O·CH<sub>3</sub>CN complexes in the  $S_0$  state, along with selected bond parameters (bond lengths in Å) at the B3LYP/6-31G\* level of theory. Some hydrogen atoms are omitted for clarity.

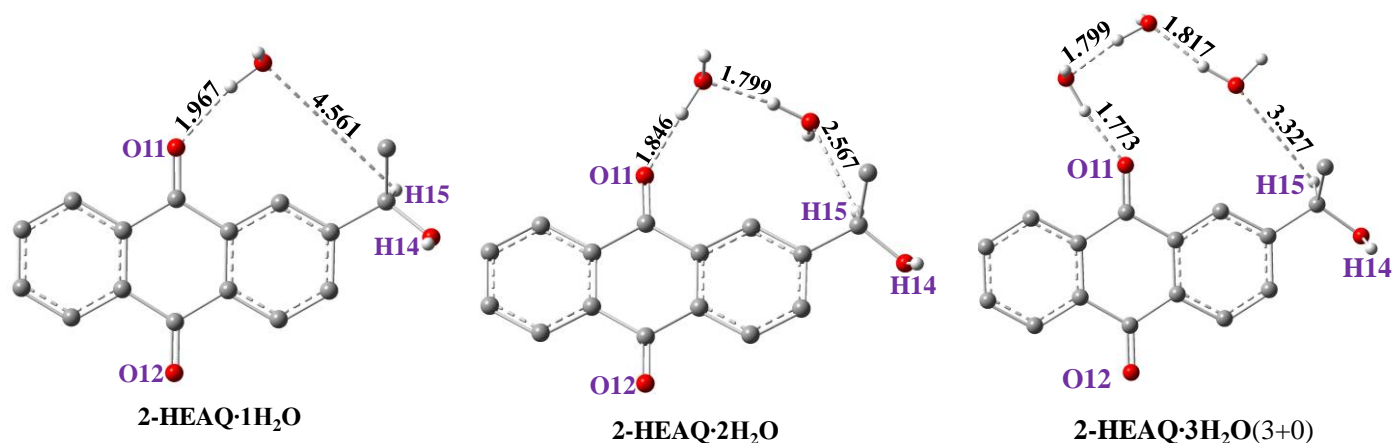

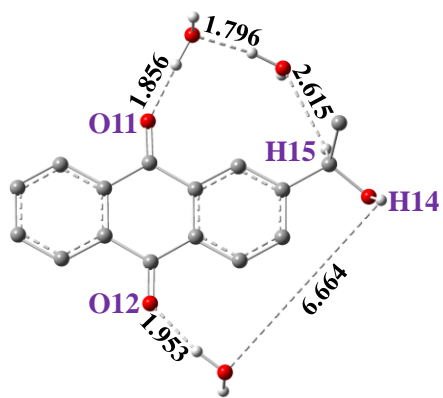

2-HEAQ·3H<sub>2</sub>O(2+1)

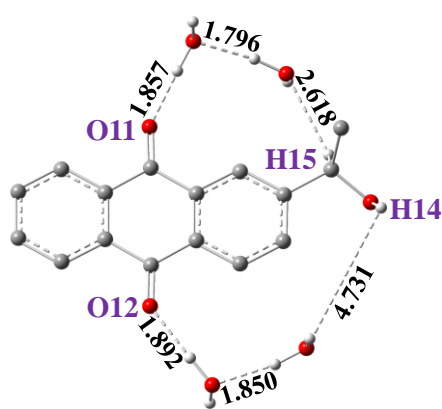

2-HEAQ·4H<sub>2</sub>O

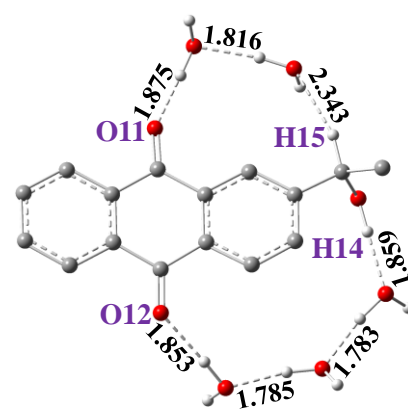

2-HEAQ·5H<sub>2</sub>O

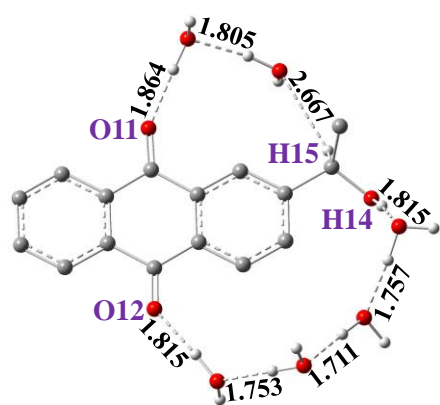

2-HEAQ·6H<sub>2</sub>O

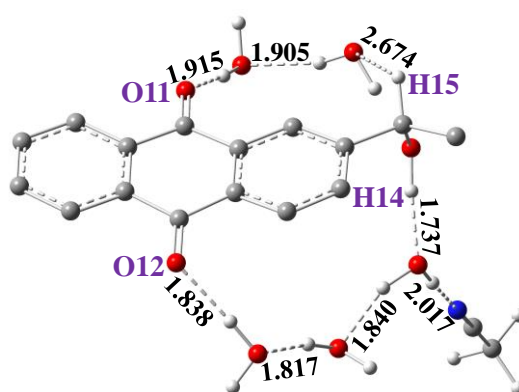

2-HEAQ·5H<sub>2</sub>O·CH<sub>3</sub>CN

## 1.2 Molecular orbitals

**Figure S1-2.** Molecular orbitals of 2-HEAQ·5H<sub>2</sub>O used in defining the active space for the first step of ESIPT at the CASSCF(12e/10o) level of theory.

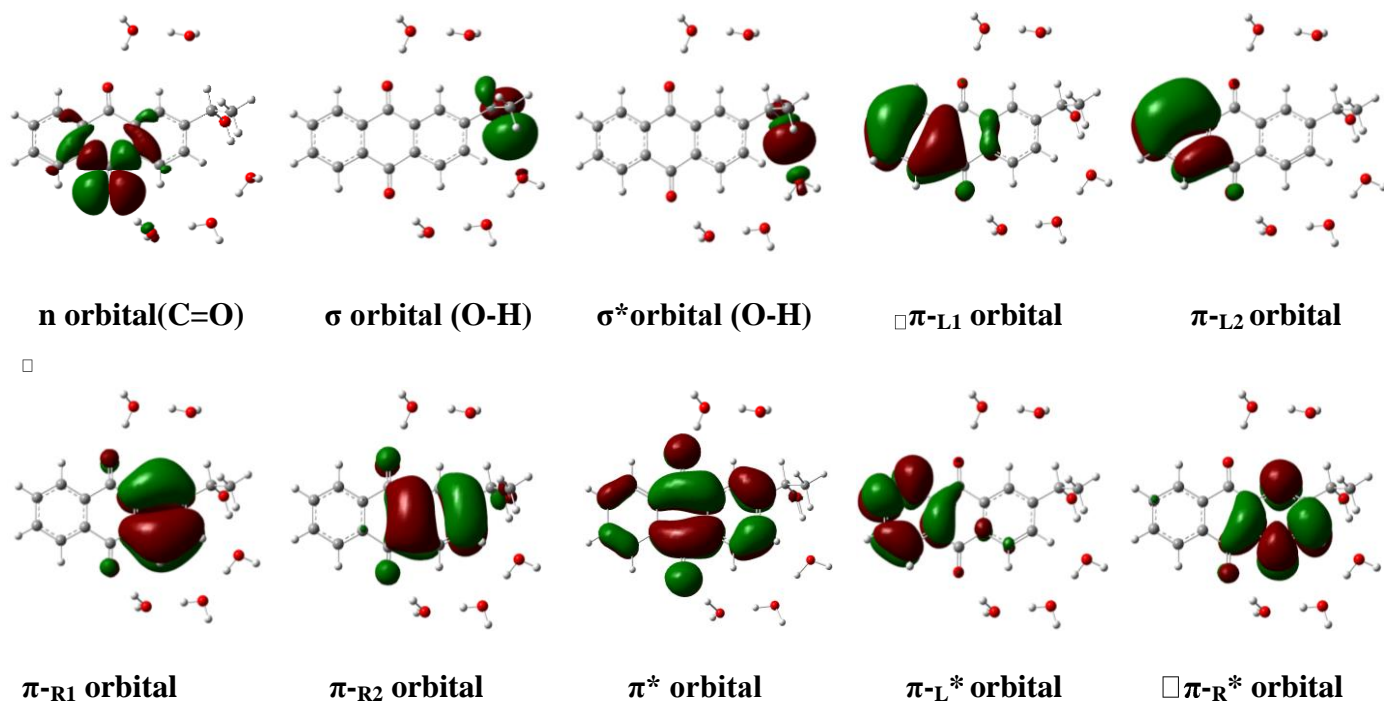

**Figure S1-3.** Molecular orbitals of 2-HEAQ·5H<sub>2</sub>O used in defining the active space for the second step of ESIPT at the CASSCF(12e/10o) level of theory.

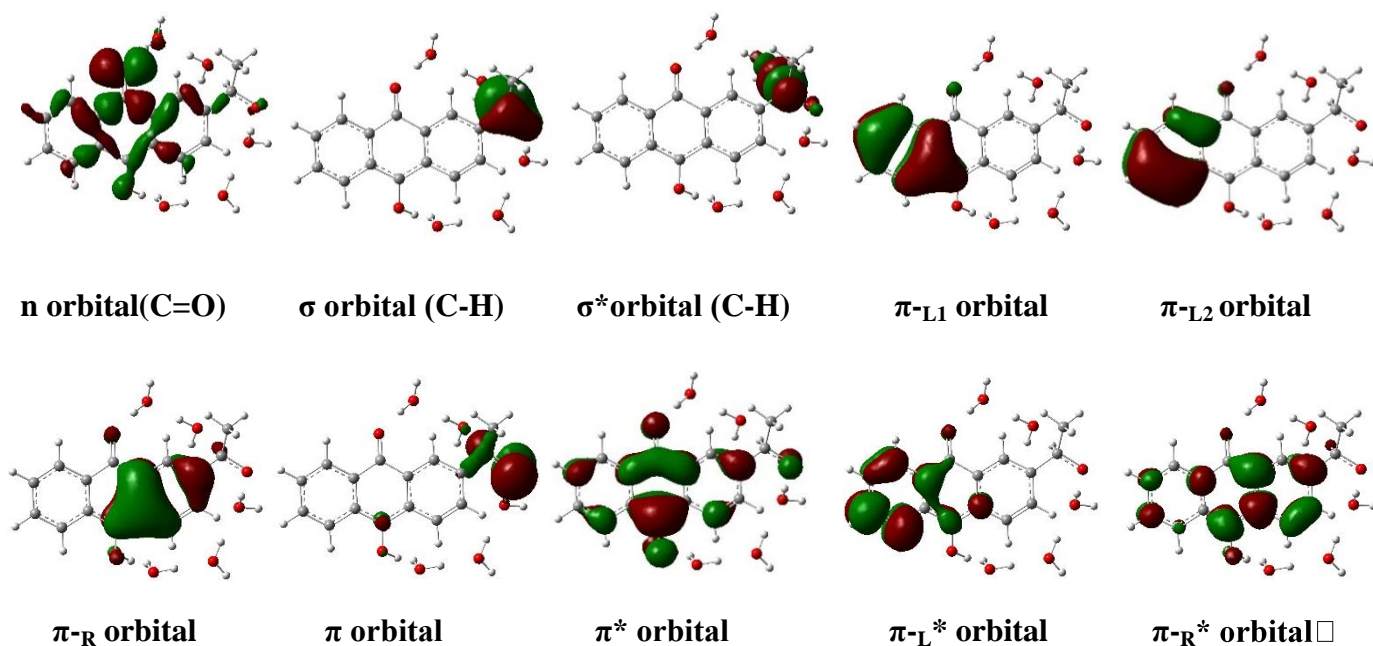

## Section 2.Figures

**Figure S2-1.** Key structural parameters of the critical points for 2-HEAQ·5H<sub>2</sub>O are shown along the ESIPT pathways of Figures 1 and 3 of the main article. The results were obtained from the CASSCF(12e/10o)/6-31G\* calculations.

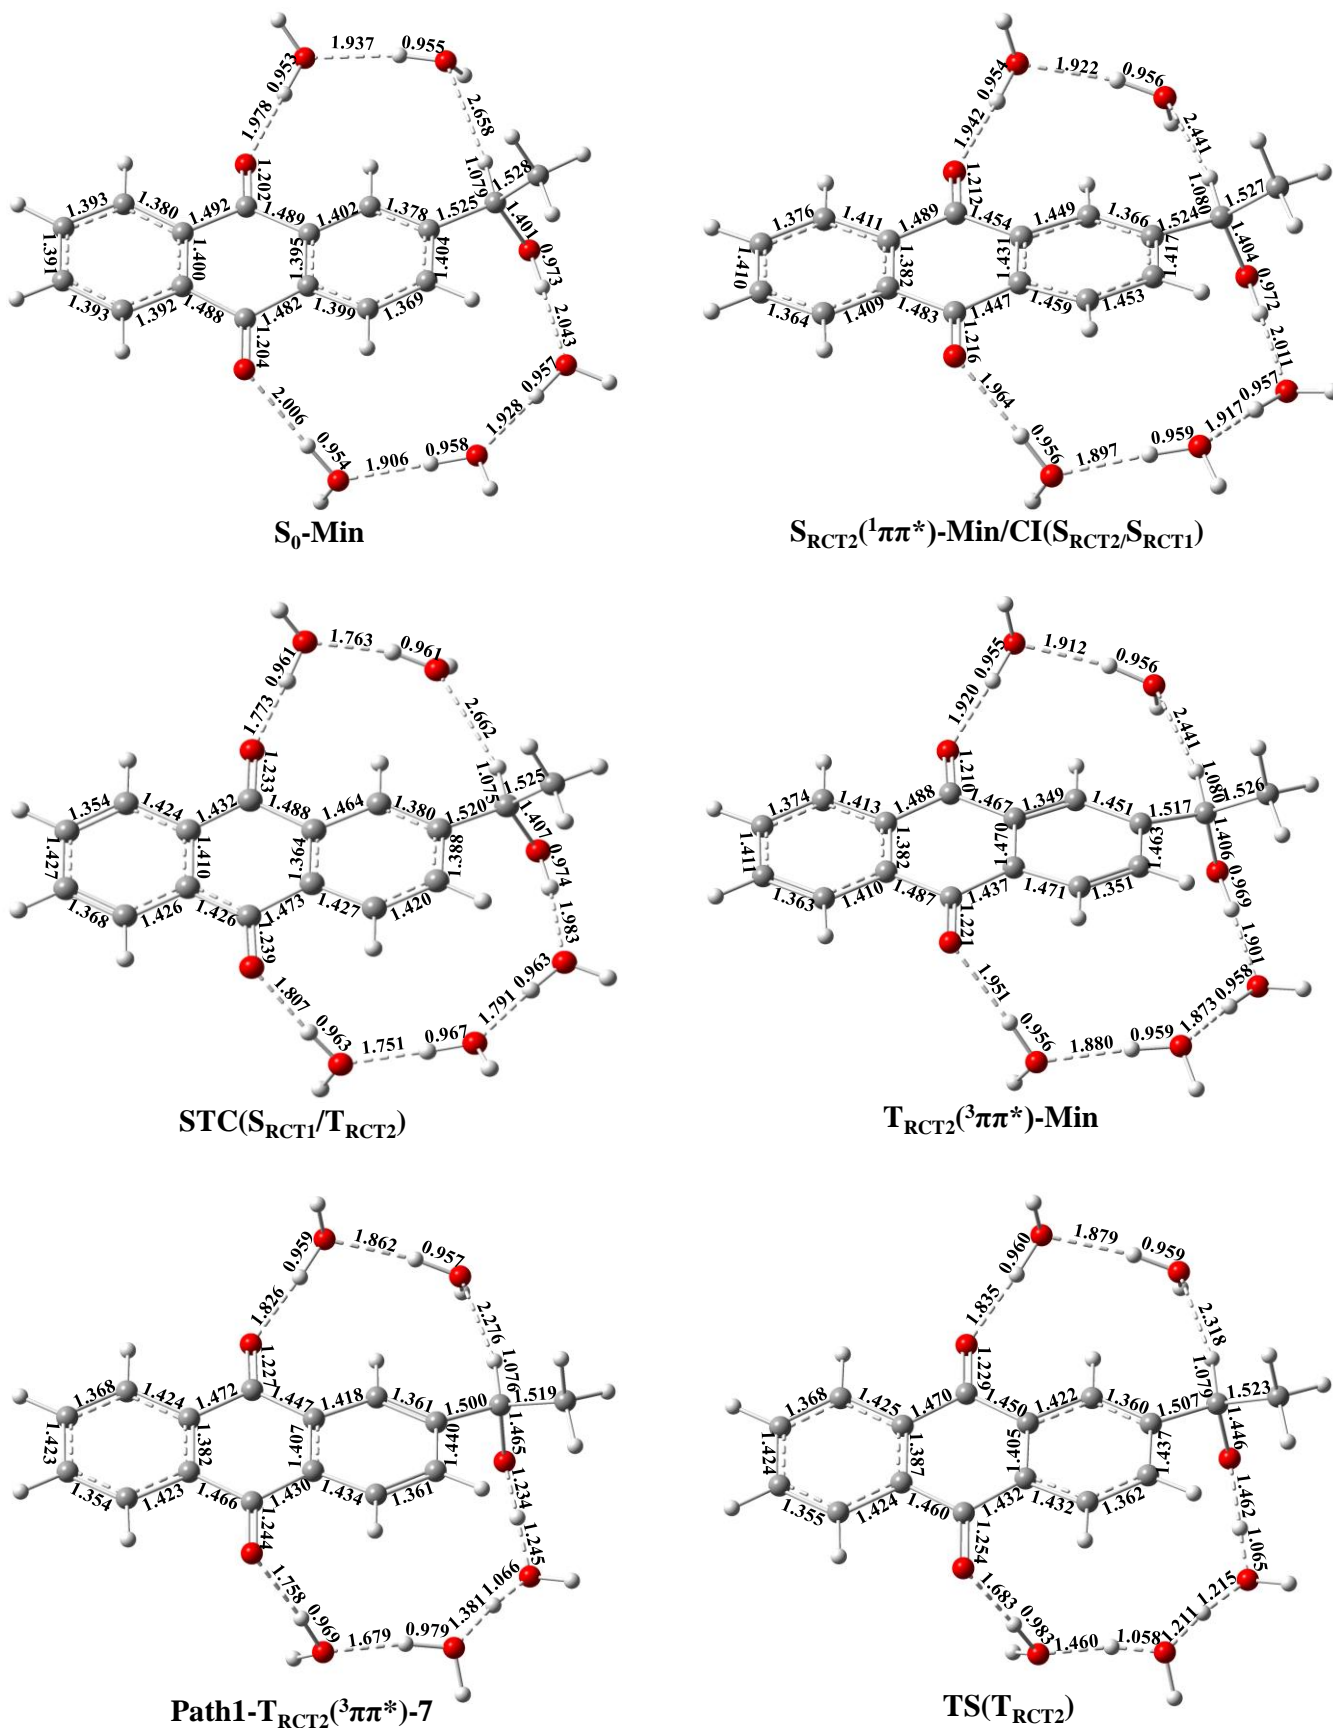

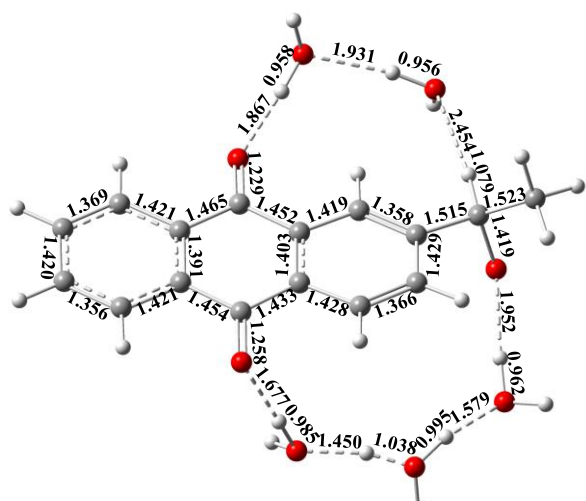

Path1- $T_{RCT2}(^3\pi\pi^*)-20$

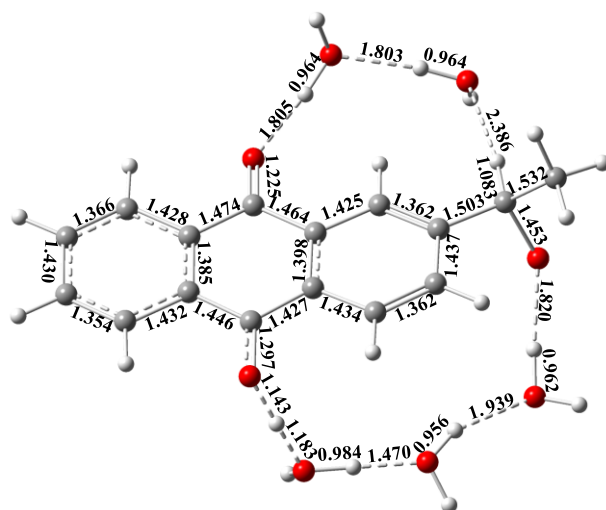

Path1- $T_{RCT2}(^3\pi\pi^*)-29$

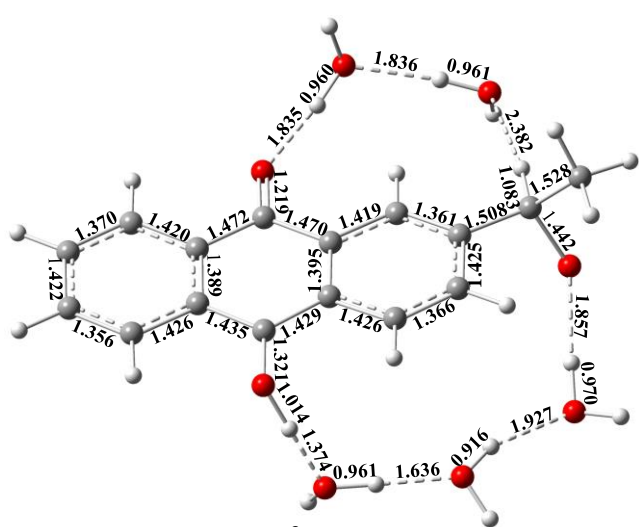

$T_{RCT2}(^3\pi\pi^*)-INT$

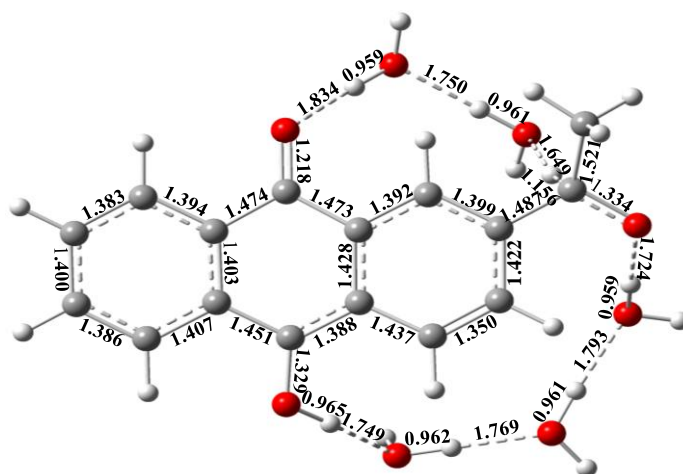

STC( $T_{RCT2}/S_0$ )

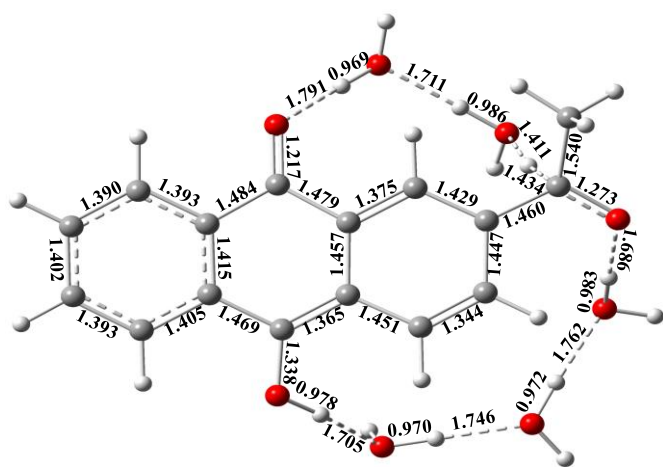

Local-Min( $S_0$ )

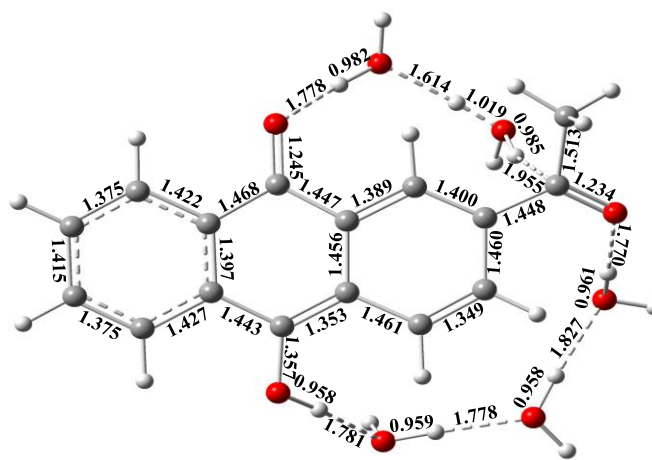

Path2- $S_0-14$

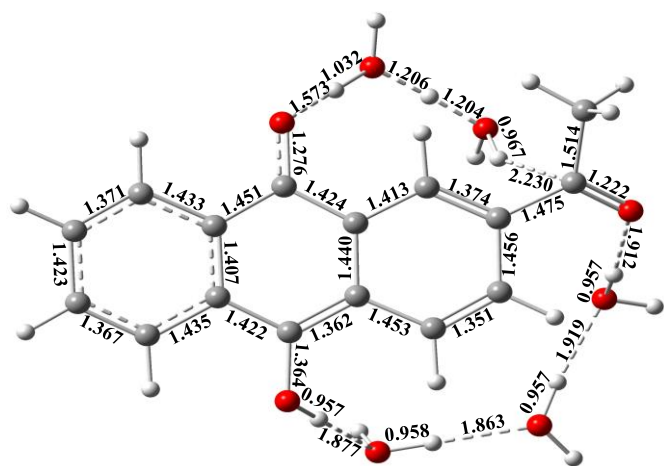

**Path2-S<sub>0</sub>-26**

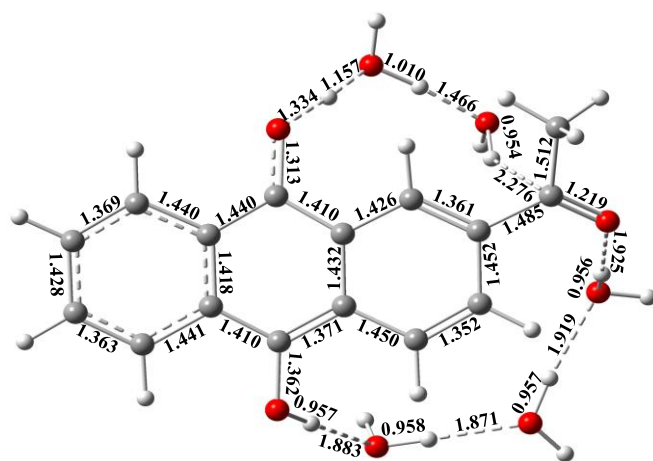

**Path2-S<sub>0</sub>-32**

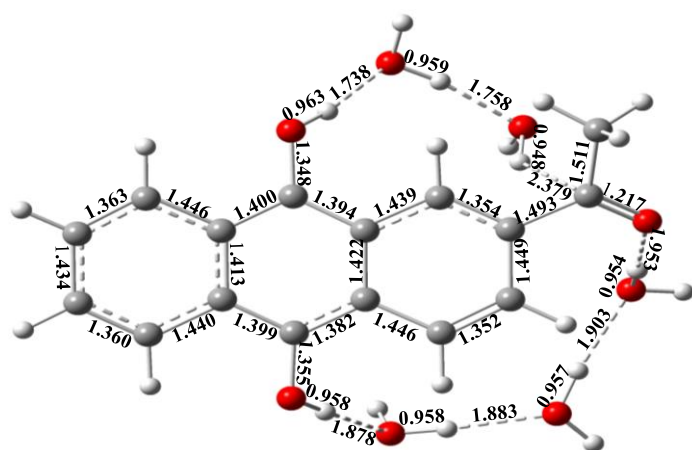

**2-acetyl-9,10-dihydroanthracene**

**Figure S2-2.** The schematic MEP for the deprotonation of 1'-substituted hydroxyl (O13-H14) in the  $S_{\text{RCT1}}(1\pi\pi^*)$  state along the reaction coordinate of O13-H14 distance obtained at the CASPT2/CASSCF(12e/10o)/6-31G\* level of theory.

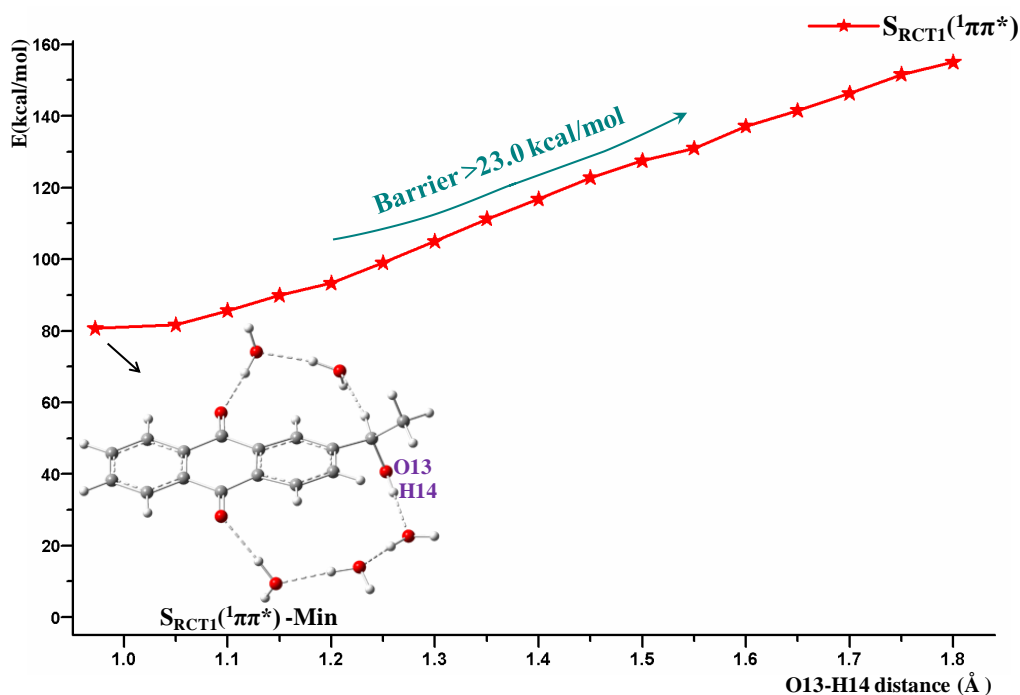

**Figure S2-3.** Key structural parameters (bond length in Å) of the critical points for 2-HEAQ are shown along the ESPT pathway. The results were obtained from the CASSCF(12e/10o)/6-31G\*\*/PCM calculations.

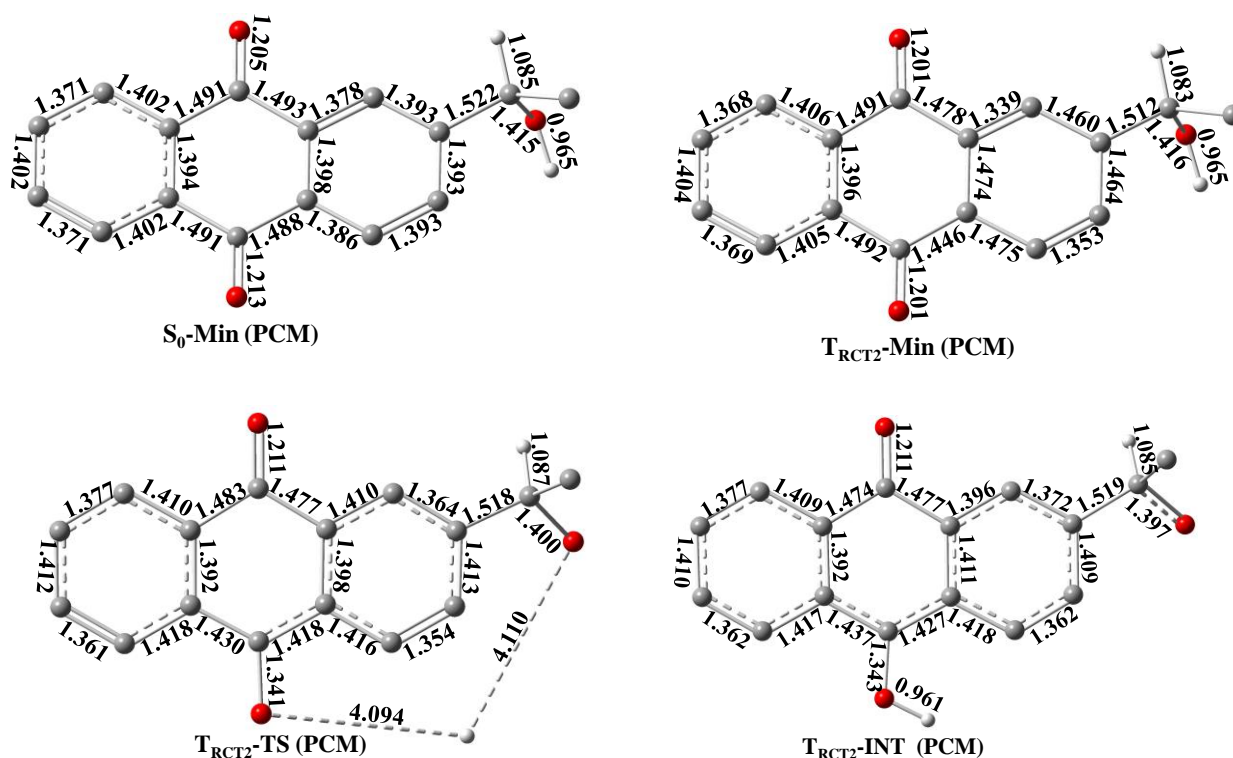



## Section 3. Tables

**Table S3-1.** The absolute energies (A.E.) in Hartree and relative energies (R.E.) in kcal/mol for the optimized structures of 2-HEAQ·5H<sub>2</sub>O along the reaction pathway of the first step of ES IPT between 1'-substituted hydroxyl (O13-H14) and carbonyl C10=O12 in the  $S_{RCT2}(^1\pi\pi^*)$  ,  $S_{RCT1}(^1\pi\pi^*)$  and  $T_{RCT2}(^3\pi\pi^*)$  states obtained at the CASPT2//CASSCF(12e/10o)/6-31G\* level of theory. The corresponding energy profiles are plotted in Figure 1 of the main article.

| 2-HEAQ·5H <sub>2</sub> O                                          | CASSCF       | CASPT2       |         |
|-------------------------------------------------------------------|--------------|--------------|---------|
|                                                                   | A.E.         | A.E.         | R.E.    |
| S <sub>0</sub> (singlet-state excitation)                         |              |              |         |
| Root1                                                             | -1217.683070 | -1221.097031 | 0       |
| Root2                                                             |              | -1220.991491 | 66.227  |
| Root3                                                             |              | -1220.962974 | 84.122  |
| Root4                                                             |              | -1220.956094 | 88.439  |
| Root5                                                             |              | -1220.954190 | 89.634  |
| Root6                                                             | -1217.445716 | -1220.922274 | 109.662 |
| S <sub>0</sub> (triplet-state excitation)                         |              |              |         |
| Root1                                                             |              | -1220.987073 | 68.999  |
| Root2                                                             | -1217.506376 | -1220.977728 | 74.864  |
| Root3                                                             |              | -1220.962709 | 84.288  |
| Root4                                                             |              | -1220.955021 | 89.113  |
| Root5                                                             |              | -1220.946303 | 94.583  |
| Path1-S <sub>RCT2</sub> ( <sup>1</sup> ππ*)-1                     |              |              |         |
| Root1                                                             |              | -1221.096538 | 0.309   |
| Root2                                                             |              | -1220.978045 | 74.665  |
| Root3                                                             |              | -1220.973672 | 77.409  |
| Root4                                                             |              | -1220.948207 | 93.389  |
| Root5                                                             | -1217.440961 | -1220.941287 | 97.731  |
| Path1-S <sub>RCT2</sub> ( <sup>1</sup> ππ*)-2                     |              |              |         |
| Root1                                                             |              | -1221.079921 | 10.737  |
| Root2                                                             |              | -1220.964607 | 83.097  |
| Root3                                                             | -1217.500573 | -1220.960589 | 85.619  |
| Root4                                                             |              | -1220.954328 | 89.548  |
| Root5                                                             |              | -1220.935961 | 101.073 |
| CI( S <sub>RCT2</sub> /S <sub>RCT1</sub> )/S <sub>RCT2</sub> -min |              |              |         |
| Root1                                                             |              | -1221.088181 | 5.553   |
| Root2[S <sub>RCT1</sub> ( <sup>1</sup> ππ*)]                      | -1217.509007 | -1220.971760 | 78.609  |
| Root3[S <sub>RCT2</sub> ( <sup>1</sup> ππ*)]                      | -1217.493722 | -1220.968433 | 80.697  |
| Root4                                                             |              | -1220.938228 | 99.650  |
| Root5                                                             |              | -1220.932025 | 103.543 |

|                                                                                           |              |              |         |
|-------------------------------------------------------------------------------------------|--------------|--------------|---------|
| Path1-S <sub>RCT1</sub> ( <sup>1</sup> $\pi\pi^*$ )-1                                     |              |              |         |
| Root1                                                                                     |              | -1221.091702 | 3.344   |
| Root2                                                                                     | -1217.509034 | -1220.972715 | 78.009  |
| Root3                                                                                     |              | -1220.970510 | 79.393  |
| Root4                                                                                     |              | -1220.940013 | 98.530  |
| Root5                                                                                     |              | -1220.933189 | 102.812 |
| Path1-S <sub>RCT1</sub> ( <sup>1</sup> $\pi\pi^*$ )-2                                     |              |              |         |
| Root1                                                                                     |              | -1221.082716 | 8.983   |
| Root2                                                                                     | -1217.495617 | -1220.974177 | 77.092  |
| Root3                                                                                     |              | -1220.956483 | 88.195  |
| Root4                                                                                     |              | -1220.933014 | 102.922 |
| Root5                                                                                     |              | -1220.929683 | 105.013 |
| STC( S <sub>RCT1</sub> /T <sub>RCT2</sub> )-S <sub>RCT1</sub> ( <sup>1</sup> $\pi\pi^*$ ) |              |              |         |
| Root1                                                                                     |              | -1221.083902 | 8.238   |
| Root2                                                                                     | -1217.510261 | -1220.975076 | 76.528  |
| Root3                                                                                     |              | -1220.968171 | 80.861  |
| Root4                                                                                     |              | -1220.939447 | 98.885  |
| Root5                                                                                     |              | -1220.932016 | 103.548 |
| STC( S <sub>RCT1</sub> /T <sub>RCT2</sub> )-T <sub>RCT2</sub> ( <sup>3</sup> $\pi\pi^*$ ) |              |              |         |
| Root1                                                                                     | -1217.533741 | -1220.982598 | 71.808  |
| Root2                                                                                     |              | -1220.976296 | 75.762  |
| Root3                                                                                     |              | -1220.973007 | 77.826  |
| Root4                                                                                     |              | -1220.949625 | 92.499  |
| Root5                                                                                     |              | -1220.943343 | 96.441  |
| T <sub>RCT2</sub> ( <sup>3</sup> $\pi\pi^*$ )-Min                                         |              |              |         |
| Root1                                                                                     | -1217.563939 | -1220.985951 | 69.704  |
| Root2                                                                                     |              | -1220.959216 | 86.480  |
| Root3                                                                                     |              | -1220.955582 | 88.761  |
| Root4                                                                                     |              | -1220.935497 | 101.364 |
| Root5                                                                                     |              | -1220.914275 | 114.681 |
| Path1-T <sub>RCT2</sub> ( <sup>3</sup> $\pi\pi^*$ )-2                                     |              |              |         |
| Root1                                                                                     | -1217.544452 | -1220.982809 | 71.675  |
| Root2                                                                                     |              | -1220.954467 | 89.460  |
| Root3                                                                                     |              | -1220.946417 | 94.512  |
| Root4                                                                                     |              | -1220.931763 | 103.707 |
| Root5                                                                                     |              | -1220.913772 | 114.997 |
| Path1-T <sub>RCT2</sub> ( <sup>3</sup> $\pi\pi^*$ )-3                                     |              |              |         |
| Root1                                                                                     | -1217.538498 | -1220.981093 | 72.752  |
| Root2                                                                                     |              | -1220.952710 | 90.563  |
| Root3                                                                                     |              | -1220.944892 | 95.469  |
| Root4                                                                                     |              | -1220.929995 | 104.816 |
| Root5                                                                                     |              | -1220.911948 | 116.141 |

|                                  |              |              |         |
|----------------------------------|--------------|--------------|---------|
| Path1- $T_{RCT2}(^3\pi\pi^*)-4$  |              |              |         |
| Root1                            | -1217.532351 | -1220.977330 | 75.114  |
| Root2                            |              | -1220.948791 | 93.022  |
| Root3                            |              | -1220.941315 | 97.713  |
| Root4                            |              | -1220.925972 | 107.341 |
| Root5                            |              | -1220.908179 | 118.506 |
| Path1- $T_{RCT2}(^3\pi\pi^*)-5$  |              |              |         |
| Root1                            | -1217.508572 | -1220.977156 | 75.223  |
| Root2                            |              | -1220.940975 | 97.927  |
| Root3                            |              | -1220.933259 | 102.768 |
| Root4                            |              | -1220.904323 | 120.926 |
| Root5                            |              | -1220.896004 | 126.146 |
| Path1- $T_{RCT2}(^3\pi\pi^*)-6$  |              |              |         |
| Root1                            | -1217.502980 | -1220.977529 | 74.989  |
| Root2                            |              | -1220.941756 | 97.436  |
| Root3                            |              | -1220.934328 | 102.098 |
| Root4                            |              | -1220.945025 | 95.385  |
| Root5                            |              | -1220.886008 | 132.419 |
| Path1- $T_{RCT2}(^3\pi\pi^*)-7$  |              |              |         |
| Root1                            | -1217.504582 | -1220.981706 | 72.367  |
| Root2                            |              | -1220.941129 | 97.830  |
| Root3                            |              | -1220.931000 | 104.186 |
| Root4                            |              | -1220.913379 | 115.243 |
| Root5                            |              | -1220.877412 | 137.813 |
| Path1- $T_{RCT2}(^3\pi\pi^*)-8$  |              |              |         |
| Root1                            | -1217.504568 | -1220.981585 | 72.443  |
| Root2                            |              | -1220.941608 | 97.530  |
| Root3                            |              | -1220.931386 | 103.944 |
| Root4                            |              | -1220.909141 | 117.903 |
| Root5                            |              | -1220.885266 | 132.885 |
| Path1- $T_{RCT2}(^3\pi\pi^*)-9$  |              |              |         |
| Root1                            | -1217.504454 | -1220.979036 | 74.043  |
| Root2                            |              | -1220.947012 | 94.139  |
| Root3                            |              | -1220.921265 | 110.295 |
| Root4                            |              | -1220.904879 | 120.577 |
| Root5                            |              | -1220.898437 | 124.619 |
| Path1- $T_{RCT2}(^3\pi\pi^*)-10$ |              |              |         |
| Root1                            | -1217.50427  | -1220.976770 | 75.465  |
| Root2                            |              | -1220.949602 | 92.513  |
| Root3                            |              | -1220.914871 | 114.307 |
| Root4                            |              | -1220.897598 | 125.146 |
| Root5                            |              | -1220.890857 | 129.376 |

|                                                |              |              |         |
|------------------------------------------------|--------------|--------------|---------|
| Path1-T <sub>RCT2</sub> ( <sup>3</sup> ππ*)-11 |              |              |         |
| Root1                                          | -1217.511242 | -1220.971748 | 78.616  |
| Root2                                          |              | -1220.948266 | 93.351  |
| Root3                                          |              | -1220.902514 | 122.061 |
| Root4                                          |              | -1220.878360 | 137.218 |
| Root5                                          |              | -1220.909722 | 117.538 |
| Path1-T <sub>RCT2</sub> ( <sup>3</sup> ππ*)-12 |              |              |         |
| Root1                                          | -1217.512247 | -1220.972049 | 78.427  |
| Root2                                          |              | -1220.949983 | 92.274  |
| Root3                                          |              | -1220.902279 | 122.209 |
| Root4                                          |              | -1220.879082 | 136.765 |
| Root5                                          |              | -1220.904216 | 120.993 |
| TS(T <sub>RCT2</sub> )                         |              |              |         |
| Root1                                          | -1217.512687 | -1220.971405 | 78.831  |
| Root2                                          |              | -1220.951942 | 91.045  |
| Root3                                          |              | -1220.901230 | 122.867 |
| Root4                                          |              | -1220.880747 | 135.720 |
| Root5                                          |              | -1220.903345 | 121.540 |
| Path1-T <sub>RCT2</sub> ( <sup>3</sup> ππ*)-14 |              |              |         |
| Root1                                          | -1217.513755 | -1220.972503 | 78.143  |
| Root2                                          |              | -1220.952504 | 90.692  |
| Root3                                          |              | -1220.901982 | 122.395 |
| Root4                                          |              | -1220.880940 | 135.599 |
| Root5                                          |              | -1220.899124 | 124.189 |
| Path1-T <sub>RCT2</sub> ( <sup>3</sup> ππ*)-15 |              |              |         |
| Root1                                          | -1217.517538 | -1220.97207  | 78.414  |
| Root2                                          |              | -1220.968766 | 80.488  |
| Root3                                          |              | -1220.971627 | 78.692  |
| Root4                                          |              | -1220.883810 | 133.798 |
| Root5                                          |              | -1220.894509 | 127.085 |
| Path1-T <sub>RCT2</sub> ( <sup>3</sup> ππ*)-16 |              |              |         |
| Root1                                          | -1217.514637 | -1220.972409 | 78.201  |
| Root2                                          |              | -1220.957534 | 87.536  |
| Root3                                          |              | -1220.90117  | 122.905 |
| Root4                                          |              | -1220.885735 | 132.590 |
| Root5                                          |              | -1220.877158 | 137.972 |
| Path1-T <sub>RCT2</sub> ( <sup>3</sup> ππ*)-17 |              |              |         |
| Root1                                          | -1217.52301  | -1220.971627 | 78.692  |
| Root2                                          |              | -1220.959355 | 86.393  |
| Root3                                          |              | -1220.899645 | 123.862 |
| Root4                                          |              | -1220.887321 | 131.595 |
| Root5                                          |              | -1220.879541 | 136.477 |
| Path1-T <sub>RCT2</sub> ( <sup>3</sup> ππ*)-18 |              |              |         |

|                                  |              |              |         |
|----------------------------------|--------------|--------------|---------|
| Root1                            | -1217.524647 | -1220.970865 | 79.170  |
| Root2                            |              | -1220.959831 | 86.094  |
| Root3                            |              | -1220.898765 | 124.414 |
| Root4                            |              | -1220.887764 | 131.317 |
| Root5                            |              | -1220.878562 | 137.091 |
| Path1- $T_{RCT2}(^3\pi\pi^*)-19$ |              |              |         |
| Root1                            | -1217.526035 | -1220.971168 | 78.980  |
| Root2                            |              | -1220.961449 | 85.079  |
| Root3                            |              | -1220.898861 | 124.354 |
| Root4                            |              | -1220.889212 | 130.408 |
| Root5                            |              | -1220.878679 | 137.018 |
| Path1- $T_{RCT2}(^3\pi\pi^*)-20$ |              |              |         |
| Root1                            | -1217.527288 | -1220.969695 | 79.904  |
| Root2                            |              | -1220.961855 | 84.824  |
| Root3                            |              | -1220.896912 | 125.577 |
| Root4                            |              | -1220.889347 | 130.323 |
| Root5                            |              | -1220.876806 | 138.193 |
| Path1- $T_{RCT2}(^3\pi\pi^*)-21$ |              |              |         |
| Root1                            | -1217.52805  | -1220.971055 | 79.051  |
| Root2                            |              | -1220.963683 | 83.677  |
| Root3                            |              | -1220.897622 | 125.131 |
| Root4                            |              | -1220.890564 | 129.560 |
| Root5                            |              | -1220.877844 | 137.542 |
| Path1- $T_{RCT2}(^3\pi\pi^*)-22$ |              |              |         |
| Root1                            | -1217.529265 | -1220.972132 | 78.375  |
| Root2                            |              | -1220.965476 | 82.552  |
| Root3                            |              | -1220.897433 | 125.250 |
| Root4                            |              | -1220.891265 | 129.120 |
| Root5                            |              | -1220.878722 | 136.991 |
| Path1- $T_{RCT2}(^3\pi\pi^*)-23$ |              |              |         |
| Root1                            | -1217.531973 | -1220.975056 | 76.540  |
| Root2                            |              | -1220.969009 | 80.335  |
| Root3                            |              | -1220.897219 | 125.384 |
| Root4                            |              | -1220.891885 | 128.731 |
| Root5                            |              | -1220.883215 | 134.172 |
| Path1- $T_{RCT2}(^3\pi\pi^*)-24$ |              |              |         |
| Root1                            | -1217.540294 | -1220.97488  | 76.651  |
| Root2                            |              | -1220.893496 | 127.720 |
| Root3                            |              | -1220.870746 | 141.996 |
| Root4                            |              | -1220.859874 | 148.818 |
| Root5                            |              | -1220.822615 | 172.199 |
| Path1- $T_{RCT2}(^3\pi\pi^*)-25$ |              |              |         |
| Root1                            | -1217.542469 | -1220.982447 | 71.903  |

|                                                |              |              |         |
|------------------------------------------------|--------------|--------------|---------|
| Root2                                          |              | -1220.976314 | 75.751  |
| Root3                                          |              | -1220.897612 | 125.138 |
| Root4                                          |              | -1220.891692 | 128.852 |
| Root5                                          |              | -1220.878201 | 137.318 |
| Path1-T <sub>RCT2</sub> ( <sup>3</sup> ππ*)-26 |              |              |         |
| Root1                                          | -1217.552717 | -1220.986507 | 69.355  |
| Root2                                          |              | -1220.903799 | 121.255 |
| Root3                                          |              | -1220.887026 | 131.780 |
| Root4                                          |              | -1220.869802 | 142.589 |
| Root5                                          |              | -1220.834658 | 164.642 |
| Path1-T <sub>RCT2</sub> ( <sup>3</sup> ππ*)-27 |              |              |         |
| Root1                                          | -1217.554862 | -1220.988372 | 68.185  |
| Root2                                          |              | -1220.905528 | 120.170 |
| Root3                                          |              | -1220.889094 | 130.482 |
| Root4                                          |              | -1220.871813 | 141.326 |
| Root5                                          |              | -1220.836665 | 163.382 |
| Path1-T <sub>RCT2</sub> ( <sup>3</sup> ππ*)-28 |              |              |         |
| Root1                                          | -1217.561595 | -1220.992009 | 65.902  |
| Root2                                          |              | -1220.90683  | 119.353 |
| Root3                                          |              | -1220.893504 | 127.715 |
| Root4                                          |              | -1220.875947 | 138.732 |
| Root5                                          |              | -1220.840966 | 160.683 |
| Path1-T <sub>RCT2</sub> ( <sup>3</sup> ππ*)-29 |              |              |         |
| Root1                                          | -1217.562891 | -1220.99274  | 65.443  |
| Root2                                          |              | -1220.907115 | 119.174 |
| Root3                                          |              | -1220.894342 | 127.189 |
| Root4                                          |              | -1220.876827 | 138.180 |
| Root5                                          |              | -1220.841837 | 160.137 |
| Path1-T <sub>RCT2</sub> ( <sup>3</sup> ππ*)-30 |              |              |         |
| Root1                                          | -1217.567448 | -1220.995852 | 63.491  |
| Root2                                          |              | -1220.909441 | 117.714 |
| Root3                                          |              | -1220.897812 | 125.012 |
| Root4                                          |              | -1220.880611 | 135.806 |
| Root5                                          |              | -1220.845503 | 157.836 |
| Path1-T <sub>RCT2</sub> ( <sup>3</sup> ππ*)-31 |              |              |         |
| Root1                                          | -1217.567118 | -1220.997873 | 62.222  |
| Root2                                          |              | -1220.908304 | 118.428 |
| Root3                                          |              | -1220.896863 | 125.608 |
| Root4                                          |              | -1220.883753 | 133.834 |
| Root5                                          |              | -1220.845204 | 158.024 |
| Path1-T <sub>RCT2</sub> ( <sup>3</sup> ππ*)-32 |              |              |         |
| Root1                                          | -1217.567354 | -1220.997835 | 62.246  |
| Root2                                          |              | -1220.90821  | 118.487 |

|                                          |              |              |         |
|------------------------------------------|--------------|--------------|---------|
| Root3                                    |              | -1220.896877 | 125.598 |
| Root4                                    |              | -1220.88375  | 133.836 |
| Root5                                    |              | -1220.845126 | 158.073 |
| Path1- $T_{\text{RCT}2}(^3\pi\pi^*)$ -33 |              |              |         |
| Root1                                    | -1217.573126 | -1221.001146 | 60.169  |
| Root2                                    |              | -1220.910589 | 116.994 |
| Root3                                    |              | -1220.900525 | 123.309 |
| Root4                                    |              | -1220.888258 | 131.007 |
| Root5                                    |              | -1220.848954 | 155.670 |
| Path1- $T_{\text{RCT}2}(^3\pi\pi^*)$ -34 |              |              |         |
| Root1                                    | -1217.579007 | -1221.003056 | 58.970  |
| Root2                                    |              | -1220.911854 | 116.200 |
| Root3                                    |              | -1220.903366 | 121.527 |
| Root4                                    |              | -1220.892619 | 128.271 |
| Root5                                    |              | -1220.851561 | 154.035 |
| $T_{\text{RCT}2}(^3\pi\pi^*)$ -INT       |              |              |         |
| Root1                                    | -1217.579944 | -1221.003767 | 58.524  |
| Root2                                    |              | -1220.912619 | 115.720 |
| Root3                                    |              | -1220.904158 | 121.030 |
| Root4                                    |              | -1220.894171 | 127.297 |
| Root5                                    |              | -1220.852410 | 153.502 |

**Table S3-2.** The absolute energies (A.E.) in Hartree and relative energies (R.E.) in kcal/mol for the optimized structures of 2-HEAQ-5H<sub>2</sub>O along the reaction pathway of the second step of ESIPT between methylene C1'-H15 and carbonyl C9=O11 in the  $T_{\text{RCT}2}(^3\pi\pi^*)$  and ground states obtained by the CASPT2//CASSCF(12e/10o)/6-31G\* level of theory. The corresponding energy profiles are plotted in Figure 3 of the main article.

| 2-HEAQ-5H <sub>2</sub> O                | CASSCF       |              | CASPT2 |         |
|-----------------------------------------|--------------|--------------|--------|---------|
|                                         | A.E.         | A.E.         | A.E.   | R.E.    |
| $T_{\text{RCT}2}(^3\pi\pi^*)$ -INT      |              |              |        |         |
| Root1                                   | -1217.579944 | -1221.003767 |        | 58.524  |
| Root2                                   |              | -1220.912619 |        | 115.720 |
| Root3                                   |              | -1220.904158 |        | 121.030 |
| Root4                                   |              | -1220.894171 |        | 127.297 |
| Root5                                   |              | -1220.85241  |        | 153.502 |
| Path2- $T_{\text{RCT}2}(^3\pi\pi^*)$ -2 |              |              |        |         |
| Root1                                   | -1217.583600 | -1221.004853 |        | 57.843  |
| Root2                                   |              | -1220.911332 |        | 116.528 |
| Root3                                   |              | -1220.893692 |        | 127.597 |
| Root4                                   |              | -1220.886947 |        | 131.830 |
| Root5                                   |              | -1220.865340 |        | 145.388 |

|                                 |              |              |         |
|---------------------------------|--------------|--------------|---------|
| Path2- $T_{RCT2}(^3\pi\pi^*)-3$ |              |              |         |
| Root1                           | -1217.581720 | -1221.004144 | 58.288  |
| Root2                           |              | -1220.910985 | 116.746 |
| Root3                           |              | -1220.893470 | 127.737 |
| Root4                           |              | -1220.886197 | 132.300 |
| Root5                           |              | -1220.865111 | 145.532 |
| Path2- $T_{RCT2}(^3\pi\pi^*)-4$ |              |              |         |
| Root1                           | -1217.579738 | -1221.003239 | 58.855  |
| Root2                           |              | -1220.910114 | 117.292 |
| Root3                           |              | -1220.892558 | 128.309 |
| Root4                           |              | -1220.885569 | 132.695 |
| Root5                           |              | -1220.864182 | 146.115 |
| Path2- $T_{RCT2}(^3\pi\pi^*)-5$ |              |              |         |
| Root1                           | -1217.577438 | -1221.002210 | 59.501  |
| Root2                           |              | -1220.909130 | 117.910 |
| Root3                           |              | -1220.891616 | 128.900 |
| Root4                           |              | -1220.884875 | 133.130 |
| Root5                           |              | -1220.863227 | 146.715 |
| Path2- $T_{RCT2}(^3\pi\pi^*)-6$ |              |              |         |
| Root1                           | -1217.574616 | -1221.000977 | 60.275  |
| Root2                           |              | -1220.908580 | 118.255 |
| Root3                           |              | -1220.891246 | 129.132 |
| Root4                           |              | -1220.883708 | 133.862 |
| Root5                           |              | -1220.862832 | 146.962 |
| Path2- $T_{RCT2}(^3\pi\pi^*)-7$ |              |              |         |
| Root1                           | -1217.571684 | -1220.999428 | 61.247  |
| Root2                           |              | -1220.906712 | 119.427 |
| Root3                           |              | -1220.889667 | 130.123 |
| Root4                           |              | -1220.882526 | 134.604 |
| Root5                           |              | -1220.861093 | 148.053 |
| Path2- $T_{RCT2}(^3\pi\pi^*)-8$ |              |              |         |
| Root1                           | -1217.568083 | -1220.998059 | 62.106  |
| Root2                           |              | -1220.905440 | 120.225 |
| Root3                           |              | -1220.889021 | 130.528 |
| Root4                           |              | -1220.881504 | 135.245 |
| Root5                           |              | -1220.860190 | 148.620 |
| Path2- $T_{RCT2}(^3\pi\pi^*)-9$ |              |              |         |
| Root1                           | -1217.552867 | -1220.998551 | 61.797  |
| Root2                           |              | -1220.905982 | 119.885 |
| Root3                           |              | -1220.914068 | 114.811 |
| Root4                           |              | -1220.876062 | 138.660 |
| Root5                           |              | -1220.858480 | 149.693 |



|                                              |              |              |         |
|----------------------------------------------|--------------|--------------|---------|
| STC( $T_{RCT2}/S_0$ )- $T_{RCT2}(3\pi\pi^*)$ |              |              |         |
| Root1                                        | -1217.545912 | -1220.995758 | 63.550  |
| Root2                                        |              | -1220.906907 | 119.305 |
| Root3                                        |              | -1220.911019 | 116.724 |
| Root4                                        |              | -1220.875714 | 138.879 |
| Root5                                        |              | -1220.857435 | 150.349 |
|                                              |              |              |         |
| STC( $T_{RCT2}/S_0$ )- $S_0$                 |              |              |         |
| Root1                                        | -1217.565129 | -1220.999397 | 61.266  |
| Root2                                        |              | -1220.915091 | 114.169 |
| Root3                                        |              | -1220.897070 | 125.477 |
| Root4                                        |              | -1220.870789 | 141.969 |
| Root5                                        |              | -1220.876217 | 138.563 |
|                                              |              |              |         |
| Path2- $S_0$ -1                              |              |              |         |
| Root1                                        | -1217.543555 | -1221.009543 | 54.900  |
| Root2                                        |              | -1220.936695 | 100.612 |
| Root3                                        |              | -1220.920119 | 111.014 |
| Root4                                        |              | -1220.902289 | 122.203 |
| Root5                                        |              | -1220.875706 | 138.884 |
|                                              |              |              |         |
| Path2- $S_0$ -2                              |              |              |         |
| Root1                                        | -1217.549903 | -1221.011868 | 53.441  |
| Root2                                        |              | -1220.933226 | 102.789 |
| Root3                                        |              | -1220.921206 | 110.332 |
| Root4                                        |              | -1220.897934 | 124.935 |
| Root5                                        |              | -1220.877870 | 137.526 |
|                                              |              |              |         |
| Path2- $S_0$ -3                              |              |              |         |
| Root1                                        | -1217.536055 | -1221.011563 | 53.632  |
| Root2                                        |              | -1220.928850 | 105.535 |
| Root3                                        |              | -1220.919734 | 111.255 |
| Root4                                        |              | -1220.903872 | 121.209 |
| Root5                                        |              | -1220.880070 | 136.145 |
|                                              |              |              |         |
| Path2- $S_0$ -4                              |              |              |         |
| Root1                                        | -1217.533831 | -1221.010879 | 54.061  |
| Root2                                        |              | -1220.929533 | 105.106 |
| Root3                                        |              | -1220.923330 | 108.999 |
| Root4                                        |              | -1220.900671 | 123.218 |
| Root5                                        |              | -1220.880984 | 135.572 |
|                                              |              |              |         |
| Path2- $S_0$ -5                              |              |              |         |
| Root1                                        | -1217.531804 | -1221.010406 | 54.358  |
| Root2                                        |              | -1220.929750 | 104.970 |
| Root3                                        |              | -1220.924864 | 108.036 |
| Root4                                        |              | -1220.897850 | 124.988 |
| Root5                                        |              | -1220.882378 | 134.697 |
|                                              |              |              |         |
| Local-Min( $S_0$ )                           |              |              |         |

|                          |              |              |         |
|--------------------------|--------------|--------------|---------|
| Root1                    | -1217.530281 | -1221.015654 | 51.065  |
| Root2                    |              | -1220.934812 | 101.794 |
| Root3                    |              | -1220.929489 | 105.134 |
| Root4                    |              | -1220.902239 | 122.234 |
| Root5                    |              | -1220.890340 | 129.701 |
|                          |              |              |         |
| Path2-S <sub>0</sub> -7  |              |              |         |
| Root1                    | -1217.528358 | -1221.015565 | 51.121  |
| Root2                    |              | -1220.936580 | 100.684 |
| Root3                    |              | -1220.924050 | 108.547 |
| Root4                    |              | -1220.894488 | 127.097 |
| Root5                    |              | -1220.884958 | 133.078 |
|                          |              |              |         |
| Path2-S <sub>0</sub> -8  |              |              |         |
| Root1                    | -1217.536912 | -1221.014248 | 51.947  |
| Root2                    |              | -1220.940940 | 97.949  |
| Root3                    |              | -1220.920671 | 110.668 |
| Root4                    |              | -1220.897742 | 125.056 |
| Root5                    |              | -1220.874655 | 139.543 |
|                          |              |              |         |
| Path2-S <sub>0</sub> -9  |              |              |         |
| Root1                    | -1217.540511 | -1221.015497 | 51.163  |
| Root2                    |              | -1220.948554 | 93.171  |
| Root3                    |              | -1220.920147 | 110.996 |
| Root4                    |              | -1220.890645 | 129.509 |
| Root5                    |              | -1220.875079 | 139.277 |
|                          |              |              |         |
| Path2-S <sub>0</sub> -10 |              |              |         |
| Root1                    | -1217.545117 | -1221.018183 | 49.478  |
| Root2                    |              | -1220.953993 | 89.757  |
| Root3                    |              | -1220.919815 | 111.205 |
| Root4                    |              | -1220.892733 | 128.199 |
| Root5                    |              | -1220.876704 | 138.257 |
|                          |              |              |         |
| Path2-S <sub>0</sub> -11 |              |              |         |
| Root1                    | -1217.545467 | -1221.020043 | 48.311  |
| Root2                    |              | -1220.960194 | 85.866  |
| Root3                    |              | -1220.920389 | 110.844 |
| Root4                    |              | -1220.893167 | 127.926 |
| Root5                    |              | -1220.893830 | 127.510 |
|                          |              |              |         |
| Path2-S <sub>0</sub> -12 |              |              |         |
| Root1                    | -1217.550337 | -1221.020242 | 48.186  |
| Root2                    |              | -1220.959626 | 86.223  |
| Root3                    |              | -1220.916558 | 113.249 |
| Root4                    |              | -1220.896594 | 125.776 |
| Root5                    |              | -1220.877179 | 137.959 |
|                          |              |              |         |
| Path2-S <sub>0</sub> -13 |              |              |         |
| Root1                    | -1217.552226 | -1221.021159 | 47.610  |

|                          |              |              |         |
|--------------------------|--------------|--------------|---------|
| Root2                    |              | -1220.960954 | 85.389  |
| Root3                    |              | -1220.916005 | 113.595 |
| Root4                    |              | -1220.896884 | 125.594 |
| Root5                    |              | -1220.876381 | 138.460 |
|                          |              |              |         |
| Path2-S <sub>0</sub> -14 |              |              |         |
| Root1                    | -1217.553804 | -1221.022205 | 46.954  |
| Root2                    |              | -1220.962179 | 84.621  |
| Root3                    |              | -1220.915855 | 113.690 |
| Root4                    |              | -1220.896928 | 125.566 |
| Root5                    |              | -1220.876136 | 138.614 |
|                          |              |              |         |
| Path2-S <sub>0</sub> -15 |              |              |         |
| Root1                    | -1217.555250 | -1221.023247 | 46.300  |
| Root2                    |              | -1220.963217 | 83.970  |
| Root3                    |              | -1220.915932 | 113.641 |
| Root4                    |              | -1220.897383 | 125.281 |
| Root5                    |              | -1220.876098 | 138.637 |
|                          |              |              |         |
| Path2-S <sub>0</sub> -16 |              |              |         |
| Root1                    | -1217.556427 | -1221.024239 | 45.678  |
| Root2                    |              | -1220.964230 | 83.334  |
| Root3                    |              | -1220.915858 | 113.688 |
| Root4                    |              | -1220.897521 | 125.195 |
| Root5                    |              | -1220.876232 | 138.553 |
|                          |              |              |         |
| Path2-S <sub>0</sub> -17 |              |              |         |
| Root1                    | -1217.557621 | -1221.025246 | 45.046  |
| Root2                    |              | -1220.965073 | 82.805  |
| Root3                    |              | -1220.916006 | 113.595 |
| Root4                    |              | -1220.898205 | 124.765 |
| Root5                    |              | -1220.876478 | 138.399 |
|                          |              |              |         |
| Path2-S <sub>0</sub> -18 |              |              |         |
| Root1                    | -1217.558546 | -1221.026115 | 44.500  |
| Root2                    |              | -1220.965853 | 82.316  |
| Root3                    |              | -1220.915788 | 113.732 |
| Root4                    |              | -1220.898608 | 124.512 |
| Root5                    |              | -1220.876714 | 138.251 |
|                          |              |              |         |
| Path2-S <sub>0</sub> -19 |              |              |         |
| Root1                    | -1217.559098 | -1221.028080 | 43.268  |
| Root2                    |              | -1220.968594 | 80.595  |
| Root3                    |              | -1220.919790 | 111.220 |
| Root4                    |              | -1220.897192 | 125.401 |
| Root5                    |              | -1220.904971 | 120.520 |
|                          |              |              |         |
| Path2-S <sub>0</sub> -20 |              |              |         |
| Root1                    | -1217.560201 | -1221.029016 | 42.680  |
| Root2                    |              | -1220.969316 | 80.142  |

|                          |              |              |         |
|--------------------------|--------------|--------------|---------|
| Root3                    |              | -1220.919853 | 111.181 |
| Root4                    |              | -1220.897801 | 125.019 |
| Root5                    |              | -1220.906170 | 119.767 |
|                          |              |              |         |
| Path2-S <sub>0</sub> -21 |              |              |         |
| Root1                    | -1217.566838 | -1221.029234 | 42.543  |
| Root2                    |              | -1220.965273 | 82.679  |
| Root3                    |              | -1220.924481 | 108.277 |
| Root4                    |              | -1220.904894 | 120.568 |
| Root5                    |              | -1220.898140 | 124.806 |
|                          |              |              |         |
| Path2-S <sub>0</sub> -22 |              |              |         |
| Root1                    | -1217.567885 | -1221.030368 | 41.832  |
| Root2                    |              | -1220.965954 | 82.252  |
| Root3                    |              | -1220.925878 | 107.400 |
| Root4                    |              | -1220.905184 | 120.386 |
| Root5                    |              | -1220.898656 | 124.482 |
|                          |              |              |         |
| Path2-S <sub>0</sub> -23 |              |              |         |
| Root1                    | -1217.569040 | -1221.031668 | 41.016  |
| Root2                    |              | -1220.966727 | 81.767  |
| Root3                    |              | -1220.927352 | 106.475 |
| Root4                    |              | -1220.905659 | 120.088 |
| Root5                    |              | -1220.899364 | 124.038 |
|                          |              |              |         |
| Path2-S <sub>0</sub> -24 |              |              |         |
| Root1                    | -1217.570239 | -1221.033118 | 40.106  |
| Root2                    |              | -1220.967543 | 81.255  |
| Root3                    |              | -1220.929028 | 105.424 |
| Root4                    |              | -1220.906043 | 119.847 |
| Root5                    |              | -1220.900136 | 123.554 |
|                          |              |              |         |
| Path2-S <sub>0</sub> -25 |              |              |         |
| Root1                    | -1217.572529 | -1221.034479 | 39.252  |
| Root2                    |              | -1220.978635 | 74.295  |
| Root3                    |              | -1220.926170 | 107.217 |
| Root4                    |              | -1220.907990 | 118.625 |
| Root5                    |              | -1220.880799 | 135.688 |
|                          |              |              |         |
| Path2-S <sub>0</sub> -26 |              |              |         |
| Root1                    | -1217.574542 | -1221.036430 | 38.027  |
| Root2                    |              | -1220.979823 | 73.549  |
| Root3                    |              | -1220.927350 | 106.477 |
| Root4                    |              | -1220.909981 | 117.375 |
| Root5                    |              | -1220.881959 | 134.960 |
|                          |              |              |         |
| Path2-S <sub>0</sub> -27 |              |              |         |
| Root1                    | -1217.576936 | -1221.038591 | 36.672  |
| Root2                    |              | -1220.980926 | 72.857  |
| Root3                    |              | -1220.928835 | 105.545 |

|                          |              |              |         |
|--------------------------|--------------|--------------|---------|
| Root4                    |              | -1220.911602 | 116.358 |
| Root5                    |              | -1220.883643 | 133.903 |
|                          |              |              |         |
| Path2-S <sub>0</sub> -28 |              |              |         |
| Root1                    | -1217.579587 | -1221.040978 | 35.173  |
| Root2                    |              | -1220.981800 | 72.309  |
| Root3                    |              | -1220.930715 | 104.365 |
| Root4                    |              | -1220.912308 | 115.916 |
| Root5                    |              | -1220.886523 | 132.096 |
|                          |              |              |         |
| Path2-S <sub>0</sub> -29 |              |              |         |
| Root1                    | -1217.582564 | -1221.043396 | 33.656  |
| Root2                    |              | -1220.982456 | 71.897  |
| Root3                    |              | -1220.932822 | 103.043 |
| Root4                    |              | -1220.913211 | 115.349 |
| Root5                    |              | -1220.890120 | 129.839 |
|                          |              |              |         |
| Path2-S <sub>0</sub> -30 |              |              |         |
| Root1                    | -1217.585010 | -1221.044796 | 32.778  |
| Root2                    |              | -1220.979177 | 73.955  |
| Root3                    |              | -1220.941219 | 97.773  |
| Root4                    |              | -1220.898568 | 124.537 |
| Root5                    |              | -1220.905994 | 119.878 |
|                          |              |              |         |
| Path2-S <sub>0</sub> -31 |              |              |         |
| Root1                    | -1217.589433 | -1221.047620 | 31.006  |
| Root2                    |              | -1220.979394 | 73.818  |
| Root3                    |              | -1220.943385 | 96.414  |
| Root4                    |              | -1220.896995 | 125.525 |
| Root5                    |              | -1220.908368 | 118.388 |
|                          |              |              |         |
| Path2-S <sub>0</sub> -32 |              |              |         |
| Root1                    | -1217.594601 | -1221.050995 | 28.888  |
| Root2                    |              | -1220.979720 | 73.614  |
| Root3                    |              | -1220.945622 | 95.010  |
| Root4                    |              | -1220.896773 | 125.664 |
| Root5                    |              | -1220.911170 | 116.629 |
|                          |              |              |         |
| Path2-S <sub>0</sub> -33 |              |              |         |
| Root1                    | -1217.609304 | -1221.055001 | 26.374  |
| Root2                    |              | -1220.972519 | 78.133  |
| Root3                    |              | -1220.948912 | 92.946  |
| Root4                    |              | -1220.915719 | 113.775 |
| Root5                    |              | -1220.911579 | 116.373 |
|                          |              |              |         |
| Path2-S <sub>0</sub> -34 |              |              |         |
| Root1                    | -1217.615766 | -1221.059618 | 23.477  |
| Root2                    |              | -1220.973974 | 77.219  |
| Root3                    |              | -1220.952945 | 90.416  |
| Root4                    |              | -1220.917775 | 112.485 |

|                          |              |              |         |
|--------------------------|--------------|--------------|---------|
| Root5                    |              | -1220.914389 | 114.609 |
| Path2-S <sub>0</sub> -35 |              |              |         |
| Root1                    | -1217.622970 | -1221.064353 | 20.506  |
| Root2                    |              | -1220.975681 | 76.149  |
| Root3                    |              | -1220.956966 | 87.892  |
| Root4                    |              | -1220.920249 | 110.933 |
| Root5                    |              | -1220.917335 | 112.761 |
| Path2-S <sub>0</sub> -36 |              |              |         |
| Root1                    | -1217.629910 | -1221.068844 | 17.688  |
| Root2                    |              | -1220.978268 | 74.525  |
| Root3                    |              | -1220.962035 | 84.711  |
| Root4                    |              | -1220.924063 | 108.539 |
| Root5                    |              | -1220.918990 | 111.722 |
| Path2-S <sub>0</sub> -37 |              |              |         |
| Root1                    | -1217.636794 | -1221.072052 | 15.674  |
| Root2                    |              | -1220.978370 | 74.461  |
| Root3                    |              | -1220.963310 | 83.911  |
| Root4                    |              | -1220.924399 | 108.328 |
| Root5                    |              | -1220.922205 | 109.705 |
| Path2-S <sub>0</sub> -38 |              |              |         |
| Root1                    | -1217.661992 | -1221.086622 | 6.532   |
| Root2                    |              | -1220.986356 | 69.449  |
| Root3                    |              | -1220.975472 | 76.279  |
| Root4                    |              | -1220.936202 | 100.922 |
| Root5                    |              | -1220.931775 | 103.700 |

**Table S3-3.** The absolute energies (A.E.) in Hartree and relative energies (R.E.) in kcal/mol for the optimized structures of 2-HEAQ·5H<sub>2</sub>O along the reaction coordinate of the deprotonation of 1'-substituted hydroxyl (O13-H14 distance) in the S<sub>RCT2</sub>(<sup>1</sup>ππ\*) state obtained by the CASPT2//CASSCF(12e/10o)/6-31G\* level of theory. The corresponding energy profiles are partially plotted by dotted line in Figure 1 of the main article.

| 2-HEAQ·5H <sub>2</sub> O                                         | CASSCF       | CASPT2       |         |
|------------------------------------------------------------------|--------------|--------------|---------|
|                                                                  | A.E.         | A.E.         | R.E.    |
| CI( S <sub>RCT2</sub> /S <sub>RCT1</sub> )/S <sub>RCT</sub> -min |              |              |         |
| Root1                                                            |              | -1221.088181 | 5.553   |
| Root2                                                            |              | -1220.971760 | 78.609  |
| Root3                                                            | -1217.493722 | -1220.968433 | 80.697  |
| Root4                                                            |              | -1220.938228 | 99.650  |
| Root5                                                            |              | -1220.932025 | 103.543 |
| S <sub>RCT</sub> ( <sup>1</sup> ππ*)-1.05                        |              |              |         |
| Root1                                                            |              | -1221.085702 | 7.109   |

|                                   |              |              |         |
|-----------------------------------|--------------|--------------|---------|
| Root2                             |              | -1220.966876 | 81.673  |
| Root3                             | -1217.492296 | -1220.966425 | 81.956  |
| Root4                             |              | -1220.934774 | 101.818 |
| Root5                             |              | -1220.928316 | 105.871 |
|                                   |              |              |         |
| $S_{\text{RCT}}(^1\pi\pi^*)-1.1$  |              |              |         |
| Root1                             |              | -1221.079707 | 10.871  |
| Root2                             |              | -1220.960589 | 85.619  |
| Root3                             | -1217.485004 | -1220.960369 | 85.757  |
| Root4                             |              | -1220.928901 | 105.503 |
| Root5                             |              | -1220.922297 | 109.647 |
|                                   |              |              |         |
| $S_{\text{RCT}}(^1\pi\pi^*)-1.15$ |              |              |         |
| Root1                             |              | -1221.072476 | 15.408  |
| Root2                             |              | -1220.953735 | 89.920  |
| Root3                             | -1217.477821 | -1220.953587 | 90.012  |
| Root4                             |              | -1220.922054 | 109.800 |
| Root5                             |              | -1220.915321 | 114.025 |
|                                   |              |              |         |
| $S_{\text{RCT}}(^1\pi\pi^*)-1.2$  |              |              |         |
| Root1                             |              | -1221.064176 | 20.617  |
| Root2                             |              | -1220.948374 | 93.284  |
| Root3                             | -1217.470837 | -1220.945230 | 95.257  |
| Root4                             |              | -1220.914747 | 114.385 |
| Root5                             |              | -1220.908233 | 118.473 |

**Table S3-4.** The absolute energies (A.E.) in Hartree and relative energies (R.E.) in kcal/mol for the optimized structures of the  $S_0$ ,  $T_{\text{RCT}2}$  minimum, transition state ( $T_{\text{RCT}2}$ -TS) and intermediate ( $T_{\text{RCT}2}$ -INT) for 2-HEAQ·5H<sub>2</sub>O along the reaction pathway of the first step of ESIPT in the  $T_{\text{RCT}2}(^3\pi\pi^*)$  state obtained at the CASPT2//CASSCF(12e/10o)/6-31G\*\* level of theory.

| 2-HEAQ·5H <sub>2</sub> O | CASSCF       | CASPT2       |         |
|--------------------------|--------------|--------------|---------|
|                          | A.E.         | A.E.         | R.E.    |
| $S_0$ -Min               |              |              |         |
| Root1                    |              | -1221.308888 | 0.000   |
| Root2                    |              | -1221.167839 | 88.510  |
| Root3                    |              | -1221.174812 | 84.134  |
| Root4                    |              | -1221.165812 | 89.782  |
| Root5                    | -1217.533870 | -1221.133908 | 109.802 |
|                          |              |              |         |
| $T_{\text{RCT}2}$ -Min   |              |              |         |
| Root1                    | -1217.650470 | -1221.202560 | 66.722  |
| Root2                    |              | -1221.176045 | 83.361  |
| Root3                    |              | -1221.166467 | 89.371  |
| Root4                    |              | -1221.153553 | 97.474  |
| Root5                    |              | -1221.135386 | 108.874 |

|                       |              |              |         |
|-----------------------|--------------|--------------|---------|
| $T_{\text{RCT2-TS}}$  |              |              |         |
| Root1                 | -1217.604675 | -1221.186522 | 76.786  |
| Root2                 |              | -1221.166475 | 89.366  |
| Root3                 |              | -1221.116762 | 120.562 |
| Root4                 |              | -1221.095719 | 133.766 |
| Root5                 |              | -1221.118657 | 119.372 |
|                       |              |              |         |
| $T_{\text{RCT2-INT}}$ |              |              |         |
| Root1                 | -1217.680590 | -1221.223155 | 53.798  |
| Root2                 |              | -1221.135244 | 108.963 |
| Root3                 |              | -1221.126941 | 114.174 |
| Root4                 |              | -1221.111348 | 123.959 |
| Root5                 |              | -1221.075199 | 146.642 |

**Table S3-5.** The absolute energies (A.E.) in Hartree and relative energies (R.E.) in kcal/mol for the optimized structures of the  $S_0$ ,  $T_{\text{RCT2}}$  minimum, transition state ( $T_{\text{RCT2-TS}}$ ) and intermediate ( $T_{\text{RCT2-INT}}$ ) for 2-HEAQ along the reaction pathway of the first step of ESIPT in the  $T_{\text{RCT2}}(^3\pi\pi^*)$  state obtained at the CASPT2//CASSCF(12e/10o)/6-31G\*\* and the CASPT2//CASSCF(12e/10o)/6-31G\*\*/PCM levels of theory.

| 2-HEAQ                            | CASSCF      | CASPT2      |         |
|-----------------------------------|-------------|-------------|---------|
|                                   | A.E.        | A.E.        | R.E.    |
| $S_0$ -Min (gas phase)            |             |             |         |
| Root1                             |             | -840.130750 | 0.000   |
| Root2                             |             | -839.988733 | 89.117  |
| Root3                             |             | -839.979812 | 94.715  |
| Root4                             |             | -839.968968 | 101.520 |
| Root5                             | -837.344975 | -839.951810 | 112.287 |
|                                   |             |             |         |
| $T_{\text{RCT2-Min}}$ (gas phase) |             |             |         |
| Root1                             | -837.466872 | -840.016335 | 71.797  |
| Root2                             |             | -839.990390 | 88.077  |
| Root3                             |             | -839.972242 | 99.465  |
| Root4                             |             | -839.972927 | 99.036  |
| Root5                             |             | -839.932086 | 124.664 |
|                                   |             |             |         |
| $T_{\text{RCT2-TS}}$ (gas phase)  |             |             |         |
| Root1                             | -837.421970 | -839.935312 | 122.639 |
| Root2                             |             | -839.855148 | 172.943 |
| Root3                             |             | -839.848672 | 177.007 |
| Root4                             |             | -839.839827 | 182.557 |
| Root5                             |             | -839.819611 | 195.243 |
|                                   |             |             |         |
| $T_{\text{RCT2-INT}}$ (gas phase) |             |             |         |
| Root1                             | -837.507282 | -840.031756 | 62.120  |
| Root2                             |             | -839.933578 | 123.728 |



|                              |              |             |         |
|------------------------------|--------------|-------------|---------|
| Root3                        |              | -839.918436 | 133.229 |
| Root4                        |              | -839.888918 | 151.752 |
| Root5                        |              | -839.897483 | 146.377 |
|                              |              |             |         |
| S <sub>0</sub> -Min (PCM)    |              |             |         |
| Root1                        |              | -840.126098 | 0.000   |
| Root2                        |              | -839.984013 | 89.160  |
| Root3                        |              | -839.976199 | 94.063  |
| Root4                        |              | -839.967837 | 99.311  |
| Root5                        | -837.3714436 | -839.947825 | 111.868 |
|                              |              |             |         |
| T <sub>RCT2</sub> -Min (PCM) |              |             |         |
| Root1                        | -823.049987  | -840.011173 | 72.117  |
| Root2                        |              | -839.985968 | 87.933  |
| Root3                        |              | -839.970276 | 97.780  |
| Root4                        |              | -839.964873 | 101.170 |
| Root5                        |              | -839.927678 | 124.511 |
|                              |              |             |         |
| T <sub>RCT2</sub> -TS (PCM)  |              |             |         |
| Root1                        | -837.476679  | -839.931671 | 122.005 |
| Root2                        |              | -839.852499 | 171.686 |
| Root3                        |              | -839.852084 | 171.947 |
| Root4                        |              | -839.845469 | 176.097 |
| Root5                        |              | -839.833735 | 183.461 |
|                              |              |             |         |
| T <sub>RCT2</sub> -INT (PCM) |              |             |         |
| Root1                        | -837.517261  | -840.030418 | 60.040  |
| Root2                        |              | -839.944204 | 114.140 |
| Root3                        |              | -839.923082 | 127.395 |
| Root4                        |              | -839.915053 | 132.433 |
| Root5                        |              | -839.873969 | 158.214 |

## Section 4. Cartesian Coordinates

**S4-1.** Cartesian coordinates of the critical points for 2-HEAQ·5H<sub>2</sub>O along the reaction pathway of the first step of ES IPT between 1'-substituted hydroxyl (O13-H14) and carbonyl C10=O12 in the  $S_{RCT2}(^1\pi\pi^*)$ ,  $S_{RCT1}(^1\pi\pi^*)$  and  $T_{RCT2}(^3\pi\pi^*)$  states obtained by the CASSCF(12e/10o)/6-31G\* level of theory.

### S<sub>0</sub>

|   |              |              |              |
|---|--------------|--------------|--------------|
| C | 0.683402095  | 1.270527079  | 0.084227174  |
| H | 0.624713460  | 2.322118274  | -0.122266004 |
| C | -0.493982949 | 0.508752829  | 0.091610392  |
| C | -1.800765101 | 1.173245425  | -0.166236161 |
| O | -1.886656733 | 2.335740190  | -0.458138380 |
| C | -3.034523018 | 0.346858782  | -0.017240805 |
| C | -4.266641523 | 0.959527022  | -0.115016111 |
| H | -4.311131994 | 2.016391156  | -0.292212790 |
| C | -5.435710554 | 0.212952320  | 0.015930449  |
| H | -6.390639793 | 0.700217919  | -0.053244670 |
| C | -5.362182751 | -1.159336323 | 0.232669658  |
| H | -6.261308397 | -1.739360648 | 0.331097420  |
| C | -4.120326416 | -1.785337377 | 0.316835448  |
| H | -4.046368376 | -2.843475108 | 0.474071423  |
| C | -2.954661667 | -1.034463473 | 0.199465528  |
| C | -1.635029644 | -1.718013818 | 0.277693206  |
| O | -1.563885271 | -2.919956440 | 0.308177022  |
| C | -0.427929695 | -0.861772241 | 0.345946420  |
| C | 0.811632919  | -1.447017936 | 0.625874654  |
| H | 0.867856827  | -2.496171502 | 0.841127804  |
| C | 1.948311121  | -0.684047559 | 0.633318003  |
| H | 2.887746357  | -1.154483710 | 0.846466038  |
| C | 1.905883076  | 0.689346216  | 0.344740629  |
| C | 3.193257259  | 1.504462190  | 0.271990255  |
| C | 4.004835223  | 1.448255825  | 1.565918381  |
| H | 4.872266416  | 2.090320922  | 1.466502862  |
| H | 3.417179755  | 1.790862490  | 2.411086569  |
| H | 4.356020561  | 0.442104560  | 1.774209224  |
| O | 1.958418894  | 4.994706247  | -0.193925040 |
| H | 1.018920246  | 5.113269145  | -0.317908724 |
| H | 2.353697180  | 5.199301671  | -1.031051894 |
| O | -0.883796058 | 5.077880496  | -0.680050588 |
| H | -1.227475573 | 4.188893738  | -0.669442892 |
| H | -1.473232261 | 5.591322427  | -0.142902303 |
| O | 3.253910174  | -4.094313359 | -0.323930027 |
| H | 2.343017118  | -4.218453489 | -0.592390302 |
| H | 3.573679947  | -4.963263392 | -0.118909493 |
| O | 4.892436679  | -1.724617394 | -0.452893377 |
| H | 4.347739921  | -2.511984165 | -0.452475536 |
| H | 5.788557953  | -2.033217040 | -0.468592710 |
| O | 0.512196585  | -4.551203842 | -1.003475436 |

|   |              |              |              |
|---|--------------|--------------|--------------|
| H | 0.194673325  | -4.550028878 | -1.897714437 |
| H | -0.160044794 | -4.108696143 | -0.490796510 |
| H | 2.919670981  | 2.532473305  | 0.089669966  |
| O | 3.959116647  | 1.117081525  | -0.835289883 |
| H | 4.277123429  | 0.205685358  | -0.714480072 |

**S<sub>RCT2</sub>-Min/CI(S<sub>RCT2</sub>/S<sub>RCT1</sub>)**

|   |              |              |              |
|---|--------------|--------------|--------------|
| C | 0.786395350  | 1.221689596  | 0.110896707  |
| H | 0.768748093  | 2.255065034  | -0.185481714 |
| C | -0.489633457 | 0.541071905  | 0.196766143  |
| C | -1.719193491 | 1.267466058  | -0.076286983 |
| O | -1.736505059 | 2.461955171  | -0.280297034 |
| C | -2.983711874 | 0.481343148  | -0.075133359 |
| C | -4.193312437 | 1.157362905  | -0.338800086 |
| H | -4.162323463 | 2.212569762  | -0.525067114 |
| C | -5.380967802 | 0.463388937  | -0.357608459 |
| H | -6.302618037 | 0.977805354  | -0.558453128 |
| C | -5.390330165 | -0.925329709 | -0.116456396 |
| H | -6.320740664 | -1.463123112 | -0.131411207 |
| C | -4.222627248 | -1.584469208 | 0.134709741  |
| H | -4.207136727 | -2.640382114 | 0.320899863  |
| C | -3.002695975 | -0.880617052 | 0.159610199  |
| C | -1.752937807 | -1.630078164 | 0.435698286  |
| O | -1.751608048 | -2.836819461 | 0.585183115  |
| C | -0.531184355 | -0.856638597 | 0.500226996  |
| C | 0.733430825  | -1.488719220 | 0.859419074  |
| H | 0.752438337  | -2.502370555 | 1.204054881  |
| C | 1.977545894  | -0.743592795 | 0.772601736  |
| H | 2.882849441  | -1.261108756 | 1.014388558  |
| C | 1.984020939  | 0.610670958  | 0.354956895  |
| C | 3.302245139  | 1.349394449  | 0.158297986  |
| C | 4.276110748  | 1.184185752  | 1.322200740  |
| H | 5.155287295  | 1.788281629  | 1.130963453  |
| H | 3.831893689  | 1.510763601  | 2.257399975  |
| H | 4.601687198  | 0.155129097  | 1.438064659  |
| O | 2.239833974  | 4.659177787  | -0.337278060 |
| H | 1.326874132  | 4.918194361  | -0.223354987 |
| H | 2.434755932  | 4.817762271  | -1.250441881 |
| O | -0.583250559 | 5.111047056  | -0.129102153 |
| H | -0.946518591 | 4.234966375  | -0.231714263 |
| H | -0.905338986 | 5.425299944  | 0.704590410  |
| O | 2.964460913  | -4.097100996 | -0.144627214 |
| H | 2.033779941  | -4.187909754 | -0.355946609 |
| H | 3.332756298  | -4.964618493 | -0.243661409 |
| O | 4.659562494  | -1.921719441 | -0.943520320 |
| H | 4.051661937  | -2.623325075 | -0.709840918 |
| H | 5.500958638  | -2.167775654 | -0.585050773 |
| O | 0.208564259  | -4.516135848 | -0.754941377 |
| H | -0.084242423 | -4.404502949 | -1.649381973 |
| H | -0.420485269 | -4.038973447 | -0.215756277 |
| H | 3.077188637  | 2.399580874  | 0.049583243  |

|   |             |             |              |
|---|-------------|-------------|--------------|
| O | 3.886610865 | 0.956719927 | -1.056791345 |
| H | 4.138248030 | 0.018904266 | -1.009982998 |

**STC(S<sub>RCT1</sub>/T<sub>RCT2</sub>)**

|   |              |              |              |
|---|--------------|--------------|--------------|
| C | 0.726367811  | 1.326292846  | 0.062270203  |
| H | 0.646020432  | 2.374465683  | -0.169165848 |
| C | -0.494626941 | 0.522304040  | 0.140025807  |
| C | -1.827468660 | 1.158932254  | -0.040860637 |
| O | -1.902392327 | 2.382041395  | -0.178039330 |
| C | -2.973411311 | 0.301054131  | -0.031285218 |
| C | -4.266860306 | 0.870411208  | -0.204553123 |
| H | -4.339931799 | 1.932756231  | -0.331030787 |
| C | -5.372473449 | 0.089276287  | -0.213957399 |
| H | -6.342355914 | 0.533381806  | -0.346024661 |
| C | -5.258485405 | -1.323695644 | -0.051617941 |
| H | -6.143983504 | -1.933382031 | -0.060945605 |
| C | -4.029393450 | -1.899438279 | 0.115618859  |
| H | -3.920497720 | -2.959184429 | 0.240862152  |
| C | -2.852603262 | -1.094526054 | 0.133696536  |
| C | -1.578469036 | -1.709459667 | 0.309680432  |
| O | -1.401412462 | -2.932172946 | 0.401684547  |
| C | -0.405272102 | -0.820800401 | 0.361752799  |
| C | 0.884438220  | -1.368953338 | 0.628774054  |
| H | 0.960530734  | -2.411221964 | 0.864790779  |
| C | 2.052890860  | -0.564506355 | 0.576916953  |
| H | 3.008401141  | -1.009448566 | 0.757976314  |
| C | 1.980851019  | 0.781191151  | 0.244573724  |
| C | 3.256488405  | 1.582347292  | 0.042452212  |
| C | 4.117290235  | 1.654358610  | 1.299373060  |
| H | 4.994860528  | 2.253159313  | 1.089088372  |
| H | 3.573457518  | 2.114836973  | 2.117067694  |
| H | 4.448018634  | 0.669850210  | 1.612659110  |
| O | 1.553928558  | 4.817190161  | -0.452940363 |
| H | 0.638769434  | 5.041553610  | -0.262119113 |
| H | 1.777234245  | 5.269084000  | -1.252511202 |
| O | -1.113417952 | 4.995114491  | -0.070004705 |
| H | -1.375598116 | 4.074563924  | -0.151085358 |
| H | -1.688028470 | 5.404935404  | 0.557961655  |
| O | 3.180110395  | -3.943863695 | -0.177013792 |
| H | 2.263419726  | -4.139910425 | -0.413801042 |
| H | 3.534022737  | -4.695270486 | 0.275096575  |
| O | 4.758360177  | -1.713464909 | -0.483012048 |
| H | 4.163263292  | -2.468386982 | -0.426737444 |
| H | 5.652978720  | -2.009554540 | -0.412844605 |
| O | 0.574867196  | -4.548449729 | -0.629636787 |
| H | 0.228227941  | -4.808295994 | -1.470373285 |
| H | -0.123115197 | -4.078182454 | -0.160787699 |
| H | 2.979380521  | 2.578372801  | -0.251650447 |
| O | 3.976914942  | 1.076854746  | -1.055543932 |
| H | 4.293681226  | 0.171153163  | -0.887536177 |

**T<sub>RCT2</sub>(<sup>3</sup>ππ\*)-Min**

|   |              |              |              |
|---|--------------|--------------|--------------|
| C | 0.694431059  | 1.271828876  | 0.197660481  |
| H | 0.704266438  | 2.304790026  | -0.097217734 |
| C | -0.481656854 | 0.615619353  | 0.270353932  |
| C | -1.740090542 | 1.297054708  | -0.052347341 |
| O | -1.807799501 | 2.483590742  | -0.281098508 |
| C | -2.968658427 | 0.457994580  | -0.093161348 |
| C | -4.196117156 | 1.082486171  | -0.410297263 |
| H | -4.199970915 | 2.136696592  | -0.605659639 |
| C | -5.352289941 | 0.342215934  | -0.466755792 |
| H | -6.286491519 | 0.816091539  | -0.707787694 |
| C | -5.312535712 | -1.044978231 | -0.210332348 |
| H | -6.219085767 | -1.621555378 | -0.254425633 |
| C | -4.130834479 | -1.653380214 | 0.093065294  |
| H | -4.081177703 | -2.706056646 | 0.292504711  |
| C | -2.939400762 | -0.901108510 | 0.156236184  |
| C | -1.676695849 | -1.610383933 | 0.494020937  |
| O | -1.665723332 | -2.819160181 | 0.667767728  |
| C | -0.485555924 | -0.814608281 | 0.610969933  |
| C | 0.780117921  | -1.432189861 | 1.036916623  |
| H | 0.755866691  | -2.442780571 | 1.388892298  |
| C | 1.938551034  | -0.740030353 | 0.970134248  |
| H | 2.856541436  | -1.215486962 | 1.252151039  |
| C | 1.967856124  | 0.643682384  | 0.497345159  |
| C | 3.261731668  | 1.340620696  | 0.123017248  |
| C | 4.366373617  | 1.187553594  | 1.164801671  |
| H | 5.229597455  | 1.760766243  | 0.846534169  |
| H | 4.045980500  | 1.559685154  | 2.133049958  |
| H | 4.677637199  | 0.154815180  | 1.278453233  |
| O | 2.178604128  | 4.642891384  | -0.361830776 |
| H | 1.267746337  | 4.897734558  | -0.222542055 |
| H | 2.346657799  | 4.799483938  | -1.281046334 |
| O | -0.628593557 | 5.095015753  | -0.078167217 |
| H | -1.005280459 | 4.225647167  | -0.196225838 |
| H | -0.923308469 | 5.390781924  | 0.772504606  |
| O | 3.036162531  | -4.064300913 | -0.248791002 |
| H | 2.093925608  | -4.147042263 | -0.405133879 |
| H | 3.402548125  | -4.914672427 | -0.450312503 |
| O | 4.566416741  | -1.830656249 | -1.065316777 |
| H | 4.003016377  | -2.564930699 | -0.818634908 |
| H | 5.425242317  | -2.032420898 | -0.721155548 |
| O | 0.267413912  | -4.481158946 | -0.698786786 |
| H | -0.063781869 | -4.383363466 | -1.581503751 |
| H | -0.347252619 | -4.008978474 | -0.139569821 |
| H | 3.047602512  | 2.392874886  | 0.012167458  |
| O | 3.671313467  | 0.894662464  | -1.146021430 |
| H | 3.976010652  | -0.023413343 | -1.086849751 |

**Path1-T<sub>RCT2</sub>(<sup>3</sup>ππ\*)-4**

|   |              |              |              |
|---|--------------|--------------|--------------|
| C | 0.763560605  | 1.201340985  | 0.225141308  |
| H | 0.844702544  | 2.215740740  | -0.121102074 |
| C | -0.458352276 | 0.626276723  | 0.317233298  |
| C | -1.670949862 | 1.357773892  | -0.052961034 |
| O | -1.687309715 | 2.536854967  | -0.333193491 |
| C | -2.940817792 | 0.573703329  | -0.090983760 |
| C | -4.136903063 | 1.256237647  | -0.421361490 |
| H | -4.087211996 | 2.308123917  | -0.626576153 |
| C | -5.326732426 | 0.573046609  | -0.476130943 |
| H | -6.236849084 | 1.089285390  | -0.725029876 |
| C | -5.357151281 | -0.815376165 | -0.206737200 |
| H | -6.292775975 | -1.344999982 | -0.250239043 |
| C | -4.208805249 | -1.478382732 | 0.106079724  |
| H | -4.209302882 | -2.531462090 | 0.313216810  |
| C | -2.980089862 | -0.781377591 | 0.167951226  |
| C | -1.753334663 | -1.546587287 | 0.517915622  |
| O | -1.784578304 | -2.759951856 | 0.666917076  |
| C | -0.542483977 | -0.793344955 | 0.691671299  |
| C | 0.672130689  | -1.460402379 | 1.186424632  |
| H | 0.573399147  | -2.453817103 | 1.578480038  |
| C | 1.867379790  | -0.837235181 | 1.118166974  |
| H | 2.753211498  | -1.338503347 | 1.457364844  |
| C | 1.987795856  | 0.520599743  | 0.570613320  |
| C | 3.324861836  | 1.090939804  | 0.138015306  |
| C | 4.440511196  | 0.890581206  | 1.162688476  |
| H | 5.345485410  | 1.350046433  | 0.779635153  |
| H | 4.196352846  | 1.357954495  | 2.112879092  |
| H | 4.656754632  | -0.158272702 | 1.348684262  |
| O | 2.487087672  | 4.356183034  | -0.443101035 |
| H | 1.586608089  | 4.638204551  | -0.280606106 |
| H | 2.625122346  | 4.460616624  | -1.375075289 |
| O | -0.253954858 | 4.942971826  | -0.080311963 |
| H | -0.723075662 | 4.120472485  | -0.223768873 |
| H | -0.472236434 | 5.219917972  | 0.799870483  |
| O | 2.770462803  | -3.883716208 | -0.416778564 |
| H | 1.815609957  | -3.908574420 | -0.557288663 |
| H | 3.103116365  | -4.713053524 | -0.736089760 |
| O | 4.366105044  | -1.812618682 | -1.066910437 |
| H | 3.709650866  | -2.574101901 | -0.839455990 |
| H | 5.175350960  | -1.993090666 | -0.603765354 |
| O | 0.101992520  | -4.171974470 | -0.822756696 |
| H | -0.221408103 | -3.971861945 | -1.691898153 |
| H | -0.512758803 | -3.762022543 | -0.210620982 |
| H | 3.201957007  | 2.158350171  | 0.000150667  |
| O | 3.640767181  | 0.549023317  | -1.109317426 |
| H | 3.960001786  | -0.489889943 | -1.027505258 |

**Path1-T<sub>RCT2</sub>(<sup>3</sup>ππ\*)-7**

|   |              |              |              |
|---|--------------|--------------|--------------|
| C | 0.911193443  | 1.107571348  | 0.243439478  |
| H | 1.036810306  | 2.097103159  | -0.147396930 |
| C | -0.402777942 | 0.579885082  | 0.313153743  |
| C | -1.524453634 | 1.395341778  | -0.100855618 |
| O | -1.414147467 | 2.567270276  | -0.446657323 |
| C | -2.841885814 | 0.738582524  | -0.094631066 |
| C | -3.987026482 | 1.499354090  | -0.466054528 |
| H | -3.849990953 | 2.528041848  | -0.731712205 |
| C | -5.225665562 | 0.919871680  | -0.478876978 |
| H | -6.091432710 | 1.492581944  | -0.755900595 |
| C | -5.368720630 | -0.450755136 | -0.125218421 |
| H | -6.344735201 | -0.901154945 | -0.136005960 |
| C | -4.284413465 | -1.183440347 | 0.221724155  |
| H | -4.370367704 | -2.217540747 | 0.489325319  |
| C | -2.990302226 | -0.592826614 | 0.245988486  |
| C | -1.840704801 | -1.420375529 | 0.623905046  |
| O | -1.957189768 | -2.643460788 | 0.821014988  |
| C | -0.576880689 | -0.757060467 | 0.714483485  |
| C | 0.562450496  | -1.485905870 | 1.191671091  |
| H | 0.407879813  | -2.470040883 | 1.585765263  |
| C | 1.807078746  | -0.935463761 | 1.166779286  |
| H | 2.636224278  | -1.496931210 | 1.554518035  |
| C | 1.999119107  | 0.390204762  | 0.637167815  |
| C | 3.371266728  | 0.925838921  | 0.354487965  |
| C | 4.495827994  | 0.578020261  | 1.314220202  |
| H | 5.439110624  | 0.970874773  | 0.954115550  |
| H | 4.281005357  | 1.045042478  | 2.266863760  |
| H | 4.600022396  | -0.486605676 | 1.475944654  |
| O | 2.916268757  | 4.130908956  | -0.451833822 |
| H | 2.017247264  | 4.446371681  | -0.357750030 |
| H | 3.119167009  | 4.223276501  | -1.370404199 |
| O | 0.196238630  | 4.829881864  | -0.290838523 |
| H | -0.333799190 | 4.039067360  | -0.404286650 |
| H | -0.065200758 | 5.195103200  | 0.540950824  |
| O | 2.329605322  | -3.863847766 | -0.839150856 |
| H | 1.353194614  | -3.796087916 | -0.825272272 |
| H | 2.536793561  | -4.664991635 | -1.300697183 |
| O | 4.026655397  | -2.131985391 | -1.119489674 |
| H | 3.225080703  | -2.827113673 | -1.016022879 |
| H | 4.767040192  | -2.451189214 | -0.619257118 |
| O | -0.315002972 | -3.985107442 | -0.868470350 |
| H | -0.754347603 | -3.750445130 | -1.673040753 |
| H | -0.849824339 | -3.588740109 | -0.164624100 |
| H | 3.361393286  | 1.983251547  | 0.155847649  |
| O | 3.645933157  | 0.307564128  | -0.944924804 |
| H | 3.827208941  | -0.912720368 | -0.966462160 |

## Path1-T<sub>RCT2</sub>(<sup>3</sup>ππ\*)-10

|   |              |              |              |
|---|--------------|--------------|--------------|
| C | 0.896829302  | 1.143391610  | 0.275403866  |
| H | 1.017067465  | 2.124225816  | -0.133019998 |
| C | -0.408433437 | 0.593671028  | 0.333966650  |
| C | -1.545821742 | 1.386138830  | -0.085272771 |
| O | -1.450772904 | 2.559296818  | -0.437972262 |
| C | -2.849694714 | 0.713384125  | -0.075901688 |
| C | -4.007967079 | 1.455209410  | -0.435761105 |
| H | -3.892428100 | 2.488463686  | -0.689766870 |
| C | -5.236853893 | 0.853008404  | -0.457490280 |
| H | -6.110292693 | 1.415404930  | -0.728417754 |
| C | -5.354736486 | -0.522368717 | -0.124062287 |
| H | -6.320045590 | -0.993179224 | -0.142439451 |
| C | -4.257221713 | -1.240180462 | 0.213975177  |
| H | -4.327928699 | -2.278587386 | 0.466027870  |
| C | -2.975728891 | -0.628316813 | 0.251014513  |
| C | -1.813938910 | -1.430113761 | 0.615357982  |
| O | -1.892634250 | -2.670644988 | 0.751161829  |
| C | -0.563781134 | -0.743159854 | 0.734123645  |
| C | 0.576641797  | -1.445345022 | 1.234470613  |
| H | 0.436572394  | -2.426479076 | 1.639258490  |
| C | 1.812685861  | -0.869862038 | 1.217268966  |
| H | 2.646626686  | -1.412660325 | 1.621077436  |
| C | 1.990946128  | 0.439150116  | 0.661727196  |
| C | 3.372367443  | 0.962893314  | 0.338389981  |
| C | 4.477993577  | 0.691689969  | 1.343263137  |
| H | 5.427213925  | 1.067826787  | 0.980223398  |
| H | 4.240429559  | 1.216153952  | 2.258269710  |
| H | 4.591697612  | -0.358751056 | 1.576483108  |
| O | 2.837602257  | 4.094248799  | -0.608275992 |
| H | 1.942709553  | 4.407225238  | -0.465430239 |
| H | 2.954817933  | 4.094449024  | -1.545467776 |
| O | 0.161483549  | 4.789477408  | -0.287646237 |
| H | -0.376787173 | 4.001863813  | -0.401660781 |
| H | -0.031344250 | 5.104523808  | 0.581738510  |
| O | 2.318819668  | -3.861318273 | -0.773882594 |
| H | 1.289199865  | -3.726208695 | -0.819788853 |
| H | 2.509081501  | -4.655544610 | -1.254968093 |
| O | 4.046809853  | -2.214504677 | -1.134660794 |
| H | 3.173902336  | -2.927576529 | -0.979087334 |
| H | 4.785822026  | -2.493869518 | -0.608455214 |
| O | -0.243159980 | -3.830656854 | -0.954052191 |
| H | -0.608203119 | -3.455608294 | -1.742383552 |
| H | -0.803775669 | -3.486362446 | -0.225602655 |
| H | 3.343409816  | 2.013159327  | 0.104099160  |
| O | 3.666871267  | 0.291293817  | -0.898717523 |
| H | 3.872382199  | -1.131146369 | -0.981164545 |



**TS(T<sub>RCT2</sub>)**

|   |              |              |              |
|---|--------------|--------------|--------------|
| C | 0.930724074  | 1.117541010  | 0.267728768  |
| H | 1.060176413  | 2.105145452  | -0.130417589 |
| C | -0.387606666 | 0.589805415  | 0.332726253  |
| C | -1.511928183 | 1.409728175  | -0.076033695 |
| O | -1.394207830 | 2.583883351  | -0.419977524 |
| C | -2.828648191 | 0.756569677  | -0.067483284 |
| C | -3.974859459 | 1.520444751  | -0.431371367 |
| H | -3.834945396 | 2.552610796  | -0.687174875 |
| C | -5.213669087 | 0.940938650  | -0.452969568 |
| H | -6.080407090 | 1.516472498  | -0.726075626 |
| C | -5.358524654 | -0.434603212 | -0.114958393 |
| H | -6.336267254 | -0.883936999 | -0.133837154 |
| C | -4.274601106 | -1.171974431 | 0.227041435  |
| H | -4.360498617 | -2.210133059 | 0.484242369  |
| C | -2.978747096 | -0.581832227 | 0.262693873  |
| C | -1.832649565 | -1.408781578 | 0.628837317  |
| O | -1.943073336 | -2.647664323 | 0.785898220  |
| C | -0.567324817 | -0.745381097 | 0.730082815  |
| C | 0.565702486  | -1.471005975 | 1.219631954  |
| H | 0.404777871  | -2.451029545 | 1.626001647  |
| C | 1.812639663  | -0.924270466 | 1.189802725  |
| H | 2.642277515  | -1.485181257 | 1.581312364  |
| C | 2.015619758  | 0.390444749  | 0.645987258  |
| C | 3.403132771  | 0.897608177  | 0.349904630  |
| C | 4.488325044  | 0.611988440  | 1.379424983  |
| H | 5.447022088  | 0.979793616  | 1.028789196  |
| H | 4.246240502  | 1.131699512  | 2.299210106  |
| H | 4.586349774  | -0.444429439 | 1.601661097  |
| O | 2.959014187  | 4.107556999  | -0.614856644 |
| H | 2.069028073  | 4.437573929  | -0.479781309 |
| H | 3.091554868  | 4.135507882  | -1.552517041 |
| O | 0.241365000  | 4.845254479  | -0.321345851 |
| H | -0.297436022 | 4.055209071  | -0.409746152 |
| H | 0.017874788  | 5.206547642  | 0.525535176  |
| O | 2.158049413  | -3.901237457 | -0.841728954 |
| H | 1.111301814  | -3.748194861 | -0.872449001 |
| H | 2.351767868  | -4.677176344 | -1.355967185 |
| O | 3.947128348  | -2.294194267 | -1.107176507 |
| H | 2.989430491  | -3.029869095 | -0.969283024 |
| H | 4.690228146  | -2.596576429 | -0.596029957 |
| O | -0.343315401 | -3.823913093 | -0.969502579 |
| H | -0.739211335 | -3.460564240 | -1.752293809 |
| H | -0.883286715 | -3.476546790 | -0.225086857 |
| H | 3.386214667  | 1.950775971  | 0.117926674  |
| O | 3.733131519  | 0.211732997  | -0.879476406 |
| H | 3.847562501  | -1.242368134 | -0.974963344 |

**Path1-T<sub>RCT2</sub>(<sup>3</sup> $\pi\pi^*$ )-17**

|   |              |              |              |
|---|--------------|--------------|--------------|
| C | 0.931638497  | 1.140581954  | 0.235444553  |
| H | 1.038830477  | 2.146071195  | -0.129059692 |
| C | -0.379612878 | 0.593139533  | 0.306211748  |
| C | -1.520048064 | 1.407691303  | -0.073014591 |
| O | -1.417507256 | 2.587538796  | -0.410641485 |
| C | -2.829184952 | 0.741757741  | -0.055912408 |
| C | -3.986183185 | 1.494829355  | -0.407554729 |
| H | -3.853926376 | 2.528952477  | -0.665929414 |
| C | -5.221027980 | 0.905696625  | -0.411992457 |
| H | -6.097908411 | 1.473345367  | -0.675137103 |
| C | -5.352205749 | -0.469639496 | -0.066521837 |
| H | -6.329069438 | -0.924528159 | -0.070465686 |
| C | -4.257228883 | -1.198327733 | 0.264667185  |
| H | -4.329572647 | -2.237225855 | 0.528635654  |
| C | -2.963954618 | -0.600013984 | 0.277431230  |
| C | -1.807494383 | -1.418147423 | 0.628403587  |
| O | -1.914950978 | -2.654004591 | 0.828329673  |
| C | -0.540532848 | -0.749059905 | 0.692389657  |
| C | 0.612979997  | -1.475496732 | 1.127521933  |
| H | 0.466261425  | -2.469598692 | 1.510737534  |
| C | 1.853406484  | -0.911540710 | 1.089564356  |
| H | 2.700287111  | -1.469133571 | 1.452070415  |
| C | 2.033114273  | 0.427876767  | 0.598296519  |
| C | 3.415546486  | 0.979271509  | 0.345006523  |
| C | 4.454531806  | 0.777607229  | 1.442928301  |
| H | 5.414504834  | 1.171463912  | 1.120703627  |
| H | 4.153195197  | 1.314573798  | 2.336890124  |
| H | 4.585222489  | -0.269364028 | 1.698108403  |
| O | 2.919771826  | 4.234353509  | -0.705348351 |
| H | 2.028196756  | 4.553838558  | -0.554728292 |
| H | 3.028081285  | 4.262427071  | -1.648553636 |
| O | 0.157316014  | 4.926027433  | -0.356566894 |
| H | -0.356588926 | 4.117035849  | -0.426459083 |
| H | -0.084993112 | 5.294847116  | 0.484679701  |
| O | 2.125843791  | -4.057650753 | -0.866444215 |
| H | 1.137140291  | -3.830963830 | -0.894556756 |
| H | 2.298346208  | -4.777128491 | -1.469726715 |
| O | 3.981507576  | -2.518076387 | -0.952507300 |
| H | 2.883014481  | -3.312420307 | -0.879467933 |
| H | 4.705295913  | -2.777954466 | -0.389358986 |
| O | -0.383655810 | -3.805951277 | -1.023586664 |
| H | -0.780275373 | -3.369978123 | -1.770861114 |
| H | -0.899964656 | -3.485508772 | -0.252391185 |
| H | 3.362340037  | 2.026653252  | 0.083021573  |
| O | 3.826491504  | 0.251789175  | -0.820652184 |
| H | 3.910584971  | -1.554967677 | -0.886029499 |

**Path1-T<sub>RCT2</sub>(<sup>3</sup>ππ\*)-20**

|   |              |              |              |
|---|--------------|--------------|--------------|
| C | 0.970820262  | 1.113885115  | 0.208039361  |
| H | 1.099146565  | 2.108406089  | -0.170513108 |
| C | -0.344977422 | 0.587916231  | 0.279971901  |
| C | -1.470760431 | 1.416389570  | -0.114932699 |
| O | -1.339793290 | 2.591164539  | -0.449719117 |
| C | -2.793918135 | 0.790256619  | -0.059439121 |
| C | -3.935434796 | 1.562022165  | -0.407187095 |
| H | -3.789590646 | 2.586293976  | -0.686954981 |
| C | -5.184548717 | 1.001249600  | -0.388346474 |
| H | -6.046221499 | 1.587320970  | -0.651591632 |
| C | -5.340039541 | -0.361994529 | -0.021393990 |
| H | -6.322047996 | -0.800167664 | -0.006433877 |
| C | -4.258426300 | -1.109921255 | 0.308611784  |
| H | -4.358229886 | -2.139779579 | 0.589276370  |
| C | -2.954817536 | -0.543169669 | 0.300947088  |
| C | -1.814969054 | -1.376763682 | 0.649199904  |
| O | -1.944880725 | -2.611546240 | 0.854032690  |
| C | -0.531420045 | -0.740320998 | 0.691581710  |
| C | 0.605395881  | -1.478313796 | 1.141509734  |
| H | 0.446040528  | -2.457243541 | 1.551066698  |
| C | 1.856730955  | -0.933035726 | 1.092744791  |
| H | 2.693427518  | -1.499656626 | 1.458905586  |
| C | 2.055986092  | 0.384827082  | 0.576078906  |
| C | 3.451344549  | 0.929501118  | 0.349256493  |
| C | 4.419328728  | 0.776420348  | 1.515449820  |
| H | 5.395477684  | 1.170650583  | 1.254560431  |
| H | 4.043614421  | 1.339538910  | 2.360418625  |
| H | 4.540056025  | -0.257410024 | 1.816682805  |
| O | 3.006995016  | 4.267200175  | -0.706062280 |
| H | 2.114379838  | 4.582340161  | -0.570129737 |
| H | 3.156015568  | 4.350187583  | -1.636664293 |
| O | 0.223034436  | 4.940837014  | -0.412379381 |
| H | -0.280136438 | 4.128324528  | -0.484598980 |
| H | -0.079821948 | 5.349797992  | 0.385232794  |
| O | 1.879220025  | -4.228535274 | -0.869921862 |
| H | 0.897185529  | -3.893743789 | -0.898643893 |
| H | 2.023753673  | -4.860516834 | -1.570179697 |
| O | 3.931093637  | -2.700658847 | -0.994944691 |
| H | 2.600924081  | -3.544260443 | -0.883450336 |
| H | 4.684058934  | -2.986574521 | -0.494204554 |
| O | -0.537158967 | -3.762764154 | -1.063543293 |
| H | -0.886138588 | -3.240613579 | -1.774975372 |
| H | -1.026691908 | -3.458338452 | -0.264465433 |
| H | 3.381055353  | 1.970567824  | 0.073633935  |
| O | 3.959508916  | 0.203352573  | -0.758314109 |
| H | 3.907823893  | -1.741211027 | -0.922707673 |

**Path1-T<sub>RCT2</sub>(<sup>3</sup>ππ\*)-23**

|   |              |              |              |
|---|--------------|--------------|--------------|
| C | 1.055721831  | 1.064853784  | 0.233628367  |
| H | 1.233532673  | 2.060832239  | -0.118914069 |
| C | -0.283879787 | 0.601046732  | 0.285830735  |
| C | -1.370210139 | 1.494664971  | -0.090136865 |
| O | -1.176259920 | 2.650112763  | -0.451109561 |
| C | -2.724280865 | 0.937353950  | -0.038386270 |
| C | -3.825822010 | 1.774166885  | -0.365811327 |
| H | -3.628785306 | 2.794424060  | -0.627579547 |
| C | -5.101637522 | 1.278868145  | -0.348584185 |
| H | -5.933571305 | 1.912387289  | -0.595997169 |
| C | -5.324714144 | -0.082334652 | -0.005402522 |
| H | -6.327783590 | -0.469203586 | 0.007342370  |
| C | -4.282757542 | -0.891205513 | 0.303066497  |
| H | -4.435172449 | -1.919783314 | 0.563204976  |
| C | -2.950334061 | -0.391787922 | 0.297110094  |
| C | -1.852852822 | -1.285602534 | 0.614408347  |
| O | -2.047231288 | -2.527462896 | 0.777481497  |
| C | -0.538085763 | -0.721879510 | 0.667306291  |
| C | 0.561867629  | -1.527523671 | 1.095011670  |
| H | 0.357724910  | -2.507372946 | 1.481314332  |
| C | 1.839852418  | -1.045357085 | 1.056774872  |
| H | 2.648821956  | -1.671067318 | 1.386717173  |
| C | 2.104657577  | 0.273534743  | 0.577557549  |
| C | 3.520509233  | 0.768017860  | 0.365082718  |
| C | 4.456276058  | 0.632776173  | 1.562584172  |
| H | 5.448902413  | 0.986145373  | 1.307148293  |
| H | 4.079155585  | 1.243653945  | 2.372725330  |
| H | 4.534688644  | -0.390635451 | 1.907724597  |
| O | 3.227381169  | 4.090188026  | -0.748964675 |
| H | 2.342798251  | 4.427769042  | -0.604482860 |
| H | 3.374225839  | 4.170111835  | -1.679838193 |
| O | 0.531743526  | 4.841155070  | -0.434531952 |
| H | -0.024288929 | 4.064354778  | -0.524267739 |
| H | 0.237172936  | 5.270466253  | 0.355173184  |
| O | 1.404970967  | -4.279643228 | -0.739146262 |
| H | 0.320642680  | -3.915336485 | -0.849364511 |
| H | 1.569286906  | -5.002841225 | -1.336533056 |
| O | 3.719746891  | -2.839483990 | -1.159662836 |
| H | 2.130109907  | -3.623811712 | -0.835027152 |
| H | 4.518361361  | -3.206695815 | -0.806931825 |
| O | -0.847403576 | -3.781236043 | -1.015878610 |
| H | -1.064654332 | -3.213176284 | -1.746693833 |
| H | -1.333490879 | -3.389834616 | -0.213777687 |
| H | 3.485957123  | 1.802581195  | 0.060706339  |
| O | 4.058537887  | -0.005247959 | -0.693905015 |
| H | 3.788619839  | -1.887575305 | -1.037150540 |

**Path1-T<sub>RCT2</sub>(<sup>3</sup>ππ\*)-26**

|   |              |              |              |
|---|--------------|--------------|--------------|
| C | 1.114966642  | 1.035238485  | 0.241949589  |
| H | 1.324960262  | 2.043064652  | -0.072461812 |
| C | -0.249664542 | 0.621269024  | 0.272487070  |
| C | -1.303136251 | 1.565921598  | -0.094395690 |
| O | -1.074312092 | 2.716054566  | -0.451203207 |
| C | -2.685084150 | 1.055975079  | -0.034628945 |
| C | -3.760426767 | 1.951748339  | -0.326593851 |
| H | -3.510599468 | 2.969793702  | -0.566721570 |
| C | -5.051098878 | 1.508737588  | -0.298731641 |
| H | -5.872048205 | 2.173148856  | -0.516313700 |
| C | -5.328859825 | 0.140692021  | 0.019761287  |
| H | -6.354953243 | -0.191401845 | 0.039001166  |
| C | -4.318571740 | -0.717177188 | 0.291995171  |
| H | -4.497171379 | -1.749719303 | 0.533249030  |
| C | -2.957595585 | -0.266578833 | 0.267855937  |
| C | -1.887908206 | -1.208526577 | 0.542916871  |
| O | -2.137682386 | -2.458534130 | 0.715059002  |
| C | -0.557080951 | -0.699570296 | 0.612372496  |
| C | 0.517010708  | -1.571332049 | 0.995216529  |
| H | 0.268444121  | -2.567572484 | 1.320931677  |
| C | 1.808269464  | -1.141230116 | 0.990199199  |
| H | 2.596631623  | -1.812575405 | 1.285545023  |
| C | 2.135523703  | 0.199891247  | 0.577701279  |
| C | 3.560495739  | 0.647149178  | 0.415488490  |
| C | 4.496173234  | 0.469476932  | 1.617246383  |
| H | 5.500578054  | 0.774104113  | 1.334327493  |
| H | 4.169895698  | 1.098911484  | 2.441246883  |
| H | 4.524475412  | -0.561928526 | 1.954156821  |
| O | 3.439541176  | 3.902699732  | -0.780357459 |
| H | 2.555252078  | 4.254503165  | -0.629671940 |
| H | 3.564979606  | 3.948647891  | -1.722529515 |
| O | 0.820418023  | 4.718519973  | -0.440459660 |
| H | 0.191854947  | 3.995869494  | -0.549966607 |
| H | 0.561564315  | 5.144597444  | 0.370752945  |
| O | 1.169245448  | -4.205274859 | -0.762400829 |
| H | -0.201105345 | -4.015975351 | -0.807780143 |
| H | 1.424259171  | -5.010438099 | -1.198968916 |
| O | 3.632863389  | -2.848737818 | -1.221758733 |
| H | 1.894185687  | -3.530857590 | -0.858565893 |
| H | 4.415109598  | -3.264504228 | -0.872619597 |
| O | -1.210073970 | -3.914761338 | -0.842929155 |
| H | -1.396921890 | -3.485315755 | -1.678807885 |
| H | -1.655020531 | -3.280213130 | -0.048663013 |
| H | 3.600271611  | 1.679545674  | 0.095426095  |
| O | 4.101654815  | -0.190777898 | -0.630852000 |
| H | 3.764047006  | -1.915297171 | -1.077391316 |

**Path1-T<sub>RCT2</sub>(<sup>3</sup>ππ\*)-29**

|   |              |              |              |
|---|--------------|--------------|--------------|
| C | 1.114027845  | 1.039019166  | 0.241077625  |
| H | 1.327623547  | 2.047459247  | -0.066454784 |
| C | -0.248683068 | 0.623975522  | 0.262647276  |
| C | -1.303441517 | 1.568573797  | -0.110704257 |
| O | -1.072930394 | 2.719249246  | -0.460980296 |
| C | -2.686860556 | 1.065357783  | -0.046169102 |
| C | -3.758935323 | 1.963707094  | -0.331849870 |
| H | -3.507295507 | 2.981005095  | -0.572521374 |
| C | -5.051955462 | 1.524313894  | -0.298953593 |
| H | -5.871229568 | 2.191539527  | -0.512510980 |
| C | -5.332095955 | 0.158466272  | 0.018849243  |
| H | -6.358824492 | -0.170479390 | 0.042878534  |
| C | -4.323228007 | -0.704281091 | 0.286569992  |
| H | -4.505563601 | -1.735840333 | 0.528359721  |
| C | -2.962319915 | -0.258300216 | 0.256426499  |
| C | -1.894345006 | -1.195596506 | 0.526968500  |
| O | -2.158068781 | -2.451700653 | 0.715565663  |
| C | -0.558787568 | -0.696933136 | 0.598391135  |
| C | 0.511807496  | -1.572548548 | 0.976275381  |
| H | 0.264267099  | -2.570757273 | 1.292816427  |
| C | 1.804336047  | -1.142136179 | 0.975301737  |
| H | 2.593856845  | -1.814918761 | 1.262610529  |
| C | 2.131702270  | 0.199157778  | 0.576944269  |
| C | 3.561721869  | 0.639781660  | 0.437369751  |
| C | 4.466520729  | 0.457878130  | 1.660610003  |
| H | 5.480049098  | 0.753152276  | 1.402533873  |
| H | 4.123720167  | 1.092601987  | 2.473380304  |
| H | 4.477805624  | -0.573284564 | 2.002579206  |
| O | 3.465688909  | 3.881997482  | -0.773582244 |
| H | 2.578882547  | 4.229820216  | -0.625003936 |
| H | 3.593896412  | 3.930071690  | -1.715066533 |
| O | 0.848122426  | 4.698827800  | -0.436937495 |
| H | 0.209785521  | 3.986043117  | -0.554594511 |
| H | 0.590549020  | 5.123057765  | 0.375548937  |
| O | 1.193483909  | -4.175162075 | -0.723083817 |
| H | -0.269598703 | -4.042564147 | -0.769902969 |
| H | 1.506900618  | -4.996144344 | -1.089130092 |
| O | 3.636050391  | -2.838160311 | -1.308261364 |
| H | 1.878994215  | -3.521951638 | -0.854357462 |
| H | 4.435034016  | -3.269955664 | -1.023923363 |
| O | -1.249477101 | -3.960424943 | -0.801094957 |
| H | -1.441096485 | -3.593365462 | -1.664170207 |
| H | -1.715207353 | -3.230886878 | 0.005726489  |
| H | 3.609335248  | 1.671063466  | 0.111182284  |
| O | 4.137312704  | -0.200286902 | -0.598664344 |
| H | 3.779876068  | -1.902995652 | -1.132196764 |

**Path1-T<sub>RCT2</sub>(<sup>3</sup>ππ\*)-32**

|   |              |              |              |
|---|--------------|--------------|--------------|
| C | 1.097498877  | 1.052211136  | 0.234844229  |
| H | 1.304519557  | 2.060162015  | -0.075613097 |
| C | -0.259657848 | 0.624745157  | 0.257138825  |
| C | -1.325268925 | 1.557154761  | -0.121071357 |
| O | -1.104519344 | 2.709127726  | -0.469378031 |
| C | -2.704582628 | 1.044494166  | -0.050589784 |
| C | -3.783474728 | 1.931212854  | -0.335986612 |
| H | -3.542848651 | 2.949504798  | -0.581241781 |
| C | -5.073637241 | 1.480529975  | -0.298241898 |
| H | -5.897804903 | 2.140633930  | -0.511926607 |
| C | -5.340523209 | 0.115316837  | 0.024117516  |
| H | -6.363361552 | -0.223478059 | 0.052307474  |
| C | -4.323595410 | -0.738849367 | 0.292293542  |
| H | -4.498540990 | -1.770198151 | 0.538096653  |
| C | -2.968488915 | -0.281768768 | 0.257899901  |
| C | -1.891298739 | -1.202983599 | 0.528895866  |
| O | -2.144899893 | -2.466161506 | 0.727331184  |
| C | -0.558307483 | -0.696778929 | 0.597691637  |
| C | 0.516593253  | -1.561356042 | 0.980281534  |
| H | 0.279389683  | -2.560052108 | 1.299010166  |
| C | 1.805650571  | -1.118145950 | 0.979150264  |
| H | 2.600708240  | -1.781808331 | 1.270284911  |
| C | 2.120358848  | 0.221110045  | 0.577307999  |
| C | 3.550592039  | 0.667368744  | 0.446859206  |
| C | 4.436332590  | 0.488156324  | 1.682316415  |
| H | 5.452785463  | 0.787319473  | 1.443382758  |
| H | 4.075019493  | 1.120997606  | 2.487559100  |
| H | 4.446287716  | -0.542670533 | 2.025369854  |
| O | 3.442364591  | 3.900599020  | -0.780275357 |
| H | 2.552155592  | 4.240604579  | -0.635971811 |
| H | 3.574420504  | 3.946498696  | -1.720495712 |
| O | 0.811347063  | 4.703156624  | -0.450976406 |
| H | 0.176237066  | 3.987690335  | -0.565168541 |
| H | 0.553790897  | 5.128976734  | 0.359762199  |
| O | 1.270047194  | -4.161746056 | -0.759617880 |
| H | -0.238841152 | -4.045682420 | -0.791454671 |
| H | 1.606952245  | -4.998952164 | -1.063311614 |
| O | 3.705195056  | -2.824093531 | -1.293703233 |
| H | 1.945406510  | -3.520006530 | -0.879172504 |
| H | 4.500491961  | -3.245583967 | -0.987646252 |
| O | -1.210912753 | -3.958905341 | -0.812642959 |
| H | -1.423666810 | -3.662089013 | -1.695773260 |
| H | -1.704138970 | -3.202954130 | 0.025873149  |
| H | 3.595057596  | 1.697632418  | 0.117013109  |
| O | 4.154031731  | -0.166800762 | -0.574388682 |
| H | 3.835605021  | -1.882458590 | -1.119116318 |

**T<sub>RCT2</sub>(<sup>3</sup>ππ\*)-INT**

|   |              |              |              |
|---|--------------|--------------|--------------|
| C | 1.056484497  | 1.078441691  | 0.224537286  |
| H | 1.246105178  | 2.088208711  | -0.083267875 |
| C | -0.285913451 | 0.620023542  | 0.244952251  |
| C | -1.376287782 | 1.528214327  | -0.137868313 |
| O | -1.179845371 | 2.684748742  | -0.469648376 |
| C | -2.745991457 | 0.995537465  | -0.059438385 |
| C | -3.838203276 | 1.859453361  | -0.336655629 |
| H | -3.622655883 | 2.881667894  | -0.582050777 |
| C | -5.122027214 | 1.384312851  | -0.293813796 |
| H | -5.955645775 | 2.031219808  | -0.502185180 |
| C | -5.359291961 | 0.018479527  | 0.025025304  |
| H | -6.372425671 | -0.343289220 | 0.058061881  |
| C | -4.325160938 | -0.818575375 | 0.287725981  |
| H | -4.485237490 | -1.851035135 | 0.532396922  |
| C | -2.983535927 | -0.337209520 | 0.250037734  |
| C | -1.887568336 | -1.224460453 | 0.517791001  |
| O | -2.134112773 | -2.503258715 | 0.736527189  |
| C | -0.557870642 | -0.705436041 | 0.584988616  |
| C | 0.527850780  | -1.547964206 | 0.966704179  |
| H | 0.317930203  | -2.552503527 | 1.276734074  |
| C | 1.808702913  | -1.072434010 | 0.966150220  |
| H | 2.616645080  | -1.719352440 | 1.254094210  |
| C | 2.092408388  | 0.266802167  | 0.570783900  |
| C | 3.522440079  | 0.732239234  | 0.457851855  |
| C | 4.368100381  | 0.566214317  | 1.719775586  |
| H | 5.386743613  | 0.882437623  | 1.524195295  |
| H | 3.960209578  | 1.190437346  | 2.506548547  |
| H | 4.383197961  | -0.462759457 | 2.066363734  |
| O | 3.382948003  | 3.953051943  | -0.793394703 |
| H | 2.488641776  | 4.274855952  | -0.652246996 |
| H | 3.518961310  | 4.000337507  | -1.730462199 |
| O | 0.718323671  | 4.724201855  | -0.461690460 |
| H | 0.093536639  | 4.002473446  | -0.566435026 |
| H | 0.466155703  | 5.151530777  | 0.347003196  |
| O | 1.470643557  | -4.141269971 | -0.764571297 |
| H | -0.162305123 | -4.055343154 | -0.811304358 |
| H | 1.870268331  | -4.959056967 | -1.037934956 |
| O | 3.867476970  | -2.779643103 | -1.263447777 |
| H | 2.128180088  | -3.514559973 | -0.879322785 |
| H | 4.665737389  | -3.178724316 | -0.943451712 |
| O | -1.120149653 | -3.983159990 | -0.840411525 |
| H | -1.340152284 | -3.752150239 | -1.735302303 |
| H | -1.703707421 | -3.136546116 | 0.071691642  |
| H | 3.558045675  | 1.761435584  | 0.123258238  |
| O | 4.196144615  | -0.076163571 | -0.527386965 |
| H | 3.965522624  | -1.829174786 | -1.095478970 |



**S4-2.** Cartesian coordinates of the critical points for 2-HEAQ·5H<sub>2</sub>O along the reaction pathway of the second step of ES IPT between methylene C1'-H15 and carbonyl C9=O11 in the  $T_{RCT_2}(^3\pi\pi^*)$  and ground states obtained by the CASSCF(12e/10o)/6-31G\* level of theory.

**Path2- $T_{RCT_2}(^3\pi\pi^*)$ -4**

|   |              |              |              |
|---|--------------|--------------|--------------|
| C | 0.785247850  | -1.244753919 | -0.693070132 |
| H | 0.849779264  | -2.306212327 | -0.578128298 |
| C | -0.458804120 | -0.638020733 | -0.481283796 |
| C | -1.610987047 | -1.484879113 | -0.132720794 |
| O | -1.489025831 | -2.672670350 | 0.103263450  |
| C | -2.920229818 | -0.827950094 | -0.088155690 |
| C | -4.077963534 | -1.610103078 | 0.072603918  |
| H | -3.970669428 | -2.675011277 | 0.144525897  |
| C | -5.319199429 | -1.008589167 | 0.130084441  |
| H | -6.206362071 | -1.604573318 | 0.240807855  |
| C | -5.417194642 | 0.394922749  | 0.050813281  |
| H | -6.381393585 | 0.866310513  | 0.100386858  |
| C | -4.287418154 | 1.171126747  | -0.087530980 |
| H | -4.352028426 | 2.238663402  | -0.144753721 |
| C | -3.013392589 | 0.564548647  | -0.173495664 |
| C | -1.841291733 | 1.362727324  | -0.334536634 |
| O | -1.997822231 | 2.682581316  | -0.309822677 |
| C | -0.576350728 | 0.749681958  | -0.575504315 |
| C | 0.574254673  | 1.504534783  | -0.924123958 |
| H | 0.504375413  | 2.563019601  | -1.069072412 |
| C | 1.780452193  | 0.900204326  | -1.089391268 |
| H | 2.643280841  | 1.500499955  | -1.306152053 |
| C | 1.913849437  | -0.499110455 | -0.965260208 |
| C | 3.258943665  | -1.166731957 | -0.790045175 |
| C | 3.538537963  | -2.476577566 | -1.504203608 |
| H | 4.442406677  | -2.892312940 | -1.073854084 |
| H | 2.736200905  | -3.184234691 | -1.344239961 |
| H | 3.683973884  | -2.341304627 | -2.568413648 |
| O | 2.832711632  | -2.109017749 | 1.884183650  |
| H | 2.038780206  | -2.638328647 | 1.793227452  |
| H | 2.591981620  | -1.347350333 | 2.390569123  |
| O | 0.609669887  | -3.689063336 | 1.656629442  |
| H | -0.145506034 | -3.356864513 | 1.170832011  |
| H | 0.777393754  | -4.559101067 | 1.323630481  |
| O | 2.613965464  | 3.760553320  | 0.443981884  |
| H | 0.878108456  | 3.914197368  | 0.840644347  |
| H | 3.175207293  | 4.509204938  | 0.584843505  |
| O | 4.201674093  | 1.592469092  | 1.097246629  |
| H | 3.119749215  | 2.984615232  | 0.695466564  |
| H | 5.109791916  | 1.810563791  | 1.251865294  |
| O | -0.053724185 | 3.989350819  | 1.061856022  |
| H | -0.132671356 | 3.699997514  | 1.960171947  |
| H | -1.241191905 | 3.152342718  | 0.060547010  |

|   |             |              |              |
|---|-------------|--------------|--------------|
| H | 3.233203844 | -1.388417599 | 0.269208991  |
| O | 4.340026850 | -0.311914680 | -0.887510459 |
| H | 4.215060129 | 0.969806163  | 0.374186753  |

### Path2-T<sub>RCT2</sub>(<sup>3</sup>ππ\*)-7

|   |              |              |              |
|---|--------------|--------------|--------------|
| C | 0.784088687  | -1.250118596 | -0.682561841 |
| H | 0.842224502  | -2.315148337 | -0.578040238 |
| C | -0.458329171 | -0.643144290 | -0.475716915 |
| C | -1.613964585 | -1.489755259 | -0.127968518 |
| O | -1.498570754 | -2.677424230 | 0.118611834  |
| C | -2.919525272 | -0.827179051 | -0.089851799 |
| C | -4.081268150 | -1.604181346 | 0.071344140  |
| H | -3.977287133 | -2.668732393 | 0.146098075  |
| C | -5.320222594 | -0.999720569 | 0.126988254  |
| H | -6.209365469 | -1.592546299 | 0.239083150  |
| C | -5.412708753 | 0.403427851  | 0.044976849  |
| H | -6.377013479 | 0.874695310  | 0.095078237  |
| C | -4.279586775 | 1.175179822  | -0.093809944 |
| H | -4.343382972 | 2.242531709  | -0.151939831 |
| C | -3.005973069 | 0.565677329  | -0.177135459 |
| C | -1.830649523 | 1.363066765  | -0.335877929 |
| O | -1.989561589 | 2.682015552  | -0.302387801 |
| C | -0.568522414 | 0.749390387  | -0.570630444 |
| C | 0.585401723  | 1.506611920  | -0.913276523 |
| H | 0.518695936  | 2.561763800  | -1.087057993 |
| C | 1.790757496  | 0.901482802  | -1.069028834 |
| H | 2.656612536  | 1.493390135  | -1.301607781 |
| C | 1.910746781  | -0.497694055 | -0.958022857 |
| C | 3.248009721  | -1.165067154 | -0.785413821 |
| C | 3.535910831  | -2.477860213 | -1.488199483 |
| H | 4.439367819  | -2.894495077 | -1.056300539 |
| H | 2.729666481  | -3.180505235 | -1.329375843 |
| H | 3.685701314  | -2.353098416 | -2.553387411 |
| O | 2.813860302  | -2.087935766 | 1.817499082  |
| H | 2.030990907  | -2.638547641 | 1.765199976  |
| H | 2.601075918  | -1.349664663 | 2.367753435  |
| O | 0.612412295  | -3.675043510 | 1.656309893  |
| H | -0.144529272 | -3.342696014 | 1.172373494  |
| H | 0.774519898  | -4.547626996 | 1.327655636  |
| O | 2.615072550  | 3.748234153  | 0.444007156  |
| H | 0.888245111  | 3.905453306  | 0.828624568  |
| H | 3.175249076  | 4.498730018  | 0.577794361  |
| O | 4.192402289  | 1.577414338  | 1.077049865  |
| H | 3.125112861  | 2.970970847  | 0.684493592  |
| H | 5.097508760  | 1.803832170  | 1.234736440  |
| O | -0.043785080 | 3.988501770  | 1.047264869  |
| H | -0.127526520 | 3.698862021  | 1.945015554  |
| H | -1.229981153 | 3.157753217  | 0.055668548  |
| H | 3.136526992  | -1.373528382 | 0.271086782  |
| O | 4.336454131  | -0.325010944 | -0.842345922 |

|   |             |             |             |
|---|-------------|-------------|-------------|
| H | 4.216325080 | 0.941897942 | 0.364086849 |
|---|-------------|-------------|-------------|

### STC( $T_{\text{RCT2}}/S_0$ )

|   |              |              |              |
|---|--------------|--------------|--------------|
| C | 0.779091624  | -1.262397953 | -0.668912603 |
| H | 0.830880482  | -2.329688662 | -0.575489715 |
| C | -0.460097362 | -0.657417783 | -0.475958909 |
| C | -1.617836622 | -1.499201925 | -0.128420411 |
| O | -1.510704164 | -2.684077385 | 0.131251584  |
| C | -2.929422511 | -0.828563887 | -0.089926482 |
| C | -4.083595059 | -1.594238661 | 0.068372977  |
| H | -3.984577561 | -2.659020191 | 0.145601972  |
| C | -5.324091091 | -0.986106759 | 0.122577005  |
| H | -6.212838036 | -1.579649006 | 0.235278287  |
| C | -5.413475690 | 0.408209810  | 0.039087104  |
| H | -6.376612786 | 0.883547668  | 0.089107869  |
| C | -4.271284106 | 1.181287157  | -0.100894387 |
| H | -4.339033690 | 2.249001869  | -0.158555091 |
| C | -3.006477746 | 0.569737664  | -0.178644375 |
| C | -1.805091950 | 1.366735075  | -0.342716298 |
| O | -1.983138906 | 2.682513624  | -0.297459640 |
| C | -0.576272950 | 0.762444100  | -0.567708216 |
| C | 0.602680805  | 1.510469151  | -0.907946867 |
| H | 0.530436585  | 2.561936725  | -1.101869151 |
| C | 1.802352484  | 0.905771424  | -1.043919368 |
| H | 2.667134754  | 1.488341356  | -1.303585385 |
| C | 1.926792764  | -0.506110884 | -0.931087094 |
| C | 3.264414342  | -1.143664427 | -0.808957806 |
| C | 3.533563771  | -2.483730979 | -1.475801289 |
| H | 4.436804071  | -2.901844968 | -1.046395727 |
| H | 2.720062406  | -3.181550911 | -1.319877996 |
| H | 3.684014789  | -2.365307831 | -2.540653893 |
| O | 2.798379205  | -2.072986641 | 1.772702651  |
| H | 2.024679426  | -2.642327883 | 1.750811149  |
| H | 2.604165360  | -1.352785936 | 2.354505249  |
| O | 0.608857865  | -3.666279176 | 1.657435950  |
| H | -0.149139405 | -3.334851507 | 1.173337883  |
| H | 0.766443658  | -4.540889834 | 1.331710431  |
| O | 2.617474332  | 3.738532127  | 0.445260935  |
| H | 0.896682927  | 3.899985921  | 0.821474134  |
| H | 3.177303893  | 4.489820282  | 0.574325996  |
| O | 4.186284323  | 1.564020915  | 1.066268534  |
| H | 3.130170086  | 2.960048078  | 0.679912499  |
| H | 5.089747333  | 1.795089156  | 1.227428587  |
| O | -0.036195898 | 3.986724269  | 1.037689565  |
| H | -0.123224205 | 3.698779083  | 1.935651212  |
| H | -1.222944852 | 3.164003970  | 0.051515149  |
| H | 3.035762621  | -1.368085842 | 0.301484138  |
| O | 4.327701254  | -0.337481795 | -0.817944712 |
| H | 4.217313848  | 0.918394286  | 0.357785563  |

## Path2-S<sub>0</sub>-3

|   |              |              |              |
|---|--------------|--------------|--------------|
| C | 0.765187196  | -1.270732484 | -0.663654200 |
| H | 0.828532866  | -2.333871089 | -0.570887217 |
| C | -0.451624809 | -0.669014814 | -0.475642990 |
| C | -1.619797435 | -1.505646547 | -0.125379074 |
| O | -1.512500372 | -2.682271007 | 0.139127079  |
| C | -2.937121585 | -0.830855600 | -0.091488431 |
| C | -4.083186312 | -1.591127919 | 0.064519375  |
| H | -3.988525503 | -2.657619523 | 0.143614317  |
| C | -5.328321387 | -0.980814293 | 0.117413116  |
| H | -6.216726801 | -1.575717532 | 0.229857788  |
| C | -5.417097591 | 0.408200036  | 0.033589205  |
| H | -6.378679646 | 0.887883005  | 0.083312506  |
| C | -4.268797063 | 1.183604694  | -0.106609620 |
| H | -4.338951975 | 2.251743277  | -0.163433626 |
| C | -3.012480245 | 0.570988692  | -0.180602160 |
| C | -1.788719397 | 1.369638162  | -0.345351272 |
| O | -1.979650871 | 2.683521966  | -0.291848198 |
| C | -0.587601762 | 0.775184857  | -0.565640096 |
| C | 0.612802018  | 1.509795064  | -0.909542214 |
| H | 0.531641209  | 2.560907724  | -1.104805666 |
| C | 1.806488412  | 0.913143043  | -1.034244193 |
| H | 2.672649813  | 1.484558781  | -1.301462601 |
| C | 1.958898138  | -0.518548920 | -0.904500764 |
| C | 3.295940680  | -1.104713510 | -0.852379027 |
| C | 3.531614536  | -2.489490079 | -1.462354239 |
| H | 4.436686218  | -2.906238430 | -1.040755693 |
| H | 2.715233955  | -3.184856279 | -1.314911942 |
| H | 3.684518238  | -2.369269215 | -2.530330455 |
| O | 2.789857070  | -2.069555599 | 1.752948195  |
| H | 2.015890533  | -2.647719569 | 1.740472936  |
| H | 2.600316686  | -1.354267987 | 2.347040225  |
| O | 0.605249278  | -3.659566806 | 1.658104688  |
| H | -0.151291947 | -3.328474698 | 1.171919396  |
| H | 0.762186904  | -4.535113054 | 1.332958453  |
| O | 2.615713262  | 3.729894727  | 0.448817233  |
| H | 0.901600581  | 3.893610187  | 0.818986339  |
| H | 3.173482249  | 4.482839904  | 0.577163291  |
| O | 4.177890592  | 1.558931410  | 1.067851954  |
| H | 3.132867752  | 2.950907393  | 0.683311463  |
| H | 5.081857940  | 1.791630792  | 1.226701677  |
| O | -0.033081405 | 3.983353124  | 1.032812604  |
| H | -0.123930311 | 3.695894819  | 1.930584631  |
| H | -1.216187179 | 3.166695096  | 0.053852541  |
| H | 2.974271410  | -1.407398790 | 0.387069218  |
| O | 4.315409789  | -0.342632257 | -0.812871781 |
| H | 4.214358218  | 0.902808407  | 0.351407737  |

## Local-Min(S<sub>0</sub>)

|   |              |              |              |
|---|--------------|--------------|--------------|
| C | 0.774721943  | -1.265421794 | -0.664313957 |
| H | 0.838031153  | -2.332662088 | -0.568082948 |
| C | -0.449335381 | -0.668578586 | -0.473005943 |
| C | -1.609424852 | -1.517391171 | -0.122992916 |
| O | -1.498458193 | -2.699450328 | 0.146476105  |
| C | -2.929350733 | -0.839371565 | -0.099280914 |
| C | -4.083853234 | -1.602874680 | 0.057285098  |
| H | -3.985216712 | -2.675110625 | 0.135257104  |
| C | -5.330991086 | -0.991483750 | 0.109993102  |
| H | -6.225162257 | -1.587557354 | 0.221202111  |
| C | -5.424491520 | 0.404693658  | 0.029662096  |
| H | -6.390025683 | 0.886996819  | 0.081714100  |
| C | -4.277236011 | 1.183070002  | -0.108690915 |
| H | -4.344130239 | 2.256765846  | -0.161971919 |
| C | -3.014759804 | 0.570602345  | -0.188072921 |
| C | -1.798174069 | 1.378812487  | -0.341538933 |
| O | -1.980111356 | 2.702099601  | -0.272087928 |
| C | -0.593104978 | 0.777952644  | -0.565345948 |
| C | 0.608557493  | 1.515537780  | -0.909623977 |
| H | 0.520568173  | 2.572382234  | -1.098373993 |
| C | 1.806769183  | 0.920244554  | -1.040000985 |
| H | 2.683752423  | 1.490511708  | -1.294857008 |
| C | 1.965018528  | -0.511595060 | -0.903983975 |
| C | 3.305341525  | -1.088058090 | -0.859548972 |
| C | 3.539196852  | -2.482475607 | -1.468733021 |
| H | 4.447066845  | -2.904076492 | -1.047018987 |
| H | 2.715140719  | -3.178777794 | -1.321112010 |
| H | 3.690442785  | -2.366278417 | -2.544554104 |
| O | 2.791972985  | -2.077083240 | 1.740450229  |
| H | 1.999495214  | -2.663277131 | 1.716364224  |
| H | 2.592184618  | -1.353110269 | 2.333194271  |
| O | 0.606225922  | -3.654004195 | 1.652302222  |
| H | -0.150313469 | -3.315530504 | 1.151153179  |
| H | 0.770684691  | -4.529610706 | 1.315937197  |
| O | 2.605468184  | 3.719451641  | 0.459740129  |
| H | 0.905542232  | 3.883792399  | 0.821477156  |
| H | 3.156359512  | 4.481399457  | 0.592005141  |
| O | 4.163869549  | 1.559840256  | 1.071088175  |
| H | 3.132272862  | 2.938518750  | 0.697362146  |
| H | 5.070525959  | 1.799844094  | 1.229476185  |
| O | -0.036649774 | 3.973775958  | 1.033633173  |
| H | -0.134511915 | 3.684146967  | 1.934200240  |
| H | -1.198048883 | 3.176271463  | 0.073057099  |
| H | 2.970564698  | -1.462623712 | 0.483140131  |
| O | 4.322808693  | -0.325305999 | -0.806995966 |
| H | 4.200466104  | 0.901416809  | 0.342740120  |

## Path2-S<sub>0</sub>-8

|   |              |              |              |
|---|--------------|--------------|--------------|
| C | 0.761430725  | -1.267775262 | -0.655677017 |
| H | 0.826501948  | -2.333595493 | -0.561743388 |
| C | -0.444351752 | -0.678135734 | -0.471323792 |
| C | -1.610825780 | -1.512272122 | -0.120495546 |
| O | -1.506058295 | -2.695199066 | 0.156984434  |
| C | -2.929754326 | -0.834057424 | -0.094802724 |
| C | -4.093379028 | -1.596215858 | 0.063804314  |
| H | -3.993203589 | -2.663972603 | 0.144895650  |
| C | -5.327074592 | -0.987034634 | 0.113024991  |
| H | -6.220896982 | -1.577652569 | 0.225458595  |
| C | -5.419788669 | 0.408693962  | 0.026875082  |
| H | -6.383701485 | 0.889093546  | 0.076173890  |
| C | -4.275399830 | 1.183602810  | -0.112958291 |
| H | -4.341814961 | 2.253947353  | -0.170965528 |
| C | -3.010471436 | 0.569968327  | -0.185459646 |
| C | -1.788867794 | 1.370384159  | -0.345597501 |
| O | -1.977357253 | 2.698240809  | -0.290155935 |
| C | -0.598299318 | 0.777587433  | -0.564907964 |
| C | 0.609202285  | 1.517066102  | -0.911668560 |
| H | 0.525184346  | 2.566301051  | -1.108267523 |
| C | 1.813327118  | 0.913742421  | -1.033137096 |
| H | 2.681806246  | 1.481707272  | -1.298840760 |
| C | 1.977868550  | -0.525996632 | -0.885101634 |
| C | 3.296957632  | -1.083260199 | -0.900516953 |
| C | 3.534332956  | -2.491495152 | -1.449935481 |
| H | 4.440733588  | -2.911724262 | -1.030828222 |
| H | 2.713674385  | -3.185944019 | -1.305446009 |
| H | 3.687737969  | -2.383192546 | -2.522007608 |
| O | 2.779915507  | -2.038317848 | 1.700228112  |
| H | 2.005627918  | -2.660522441 | 1.720067756  |
| H | 2.595357787  | -1.347250684 | 2.339316619  |
| O | 0.608828299  | -3.646177198 | 1.664746349  |
| H | -0.154097882 | -3.314196369 | 1.171460213  |
| H | 0.759429361  | -4.525506148 | 1.340466531  |
| O | 2.613152647  | 3.720824888  | 0.450935438  |
| H | 0.902111084  | 3.887137116  | 0.812248638  |
| H | 3.164042642  | 4.478493830  | 0.577503975  |
| O | 4.169871880  | 1.551662610  | 1.072697821  |
| H | 3.132100376  | 2.944711532  | 0.686578138  |
| H | 5.071906222  | 1.795348633  | 1.227235088  |
| O | -0.030608328 | 3.982832895  | 1.026990469  |
| H | -0.129723884 | 3.692946354  | 1.922481472  |
| H | -1.208975774 | 3.169104043  | 0.056308455  |
| H | 2.927000112  | -1.536033344 | 0.659411109  |
| O | 4.320431570  | -0.350167244 | -0.800292523 |
| H | 4.204351741  | 0.902387685  | 0.348686521  |

## Path2-S<sub>0</sub>-11

|   |              |              |              |
|---|--------------|--------------|--------------|
| C | 0.777993873  | -1.266201547 | -0.654113600 |
| H | 0.819831055  | -2.335506267 | -0.560651738 |
| C | -0.456314335 | -0.680564933 | -0.467433770 |
| C | -1.606696002 | -1.504946224 | -0.119033330 |
| O | -1.502233058 | -2.703538312 | 0.166973099  |
| C | -2.918488105 | -0.831084443 | -0.091442779 |
| C | -4.092904742 | -1.601639226 | 0.069052033  |
| H | -3.994555245 | -2.665745891 | 0.151335373  |
| C | -5.327403423 | -0.994292856 | 0.116055654  |
| H | -6.219331888 | -1.582547993 | 0.228701039  |
| C | -5.415647116 | 0.408976910  | 0.025276822  |
| H | -6.381707810 | 0.882134040  | 0.072086251  |
| C | -4.277926895 | 1.176253379  | -0.113832998 |
| H | -4.343199225 | 2.245404702  | -0.176366890 |
| C | -2.999667981 | 0.560065314  | -0.182962773 |
| C | -1.795242485 | 1.359539206  | -0.346445856 |
| O | -1.985664712 | 2.698523977  | -0.310458344 |
| C | -0.600548062 | 0.770482598  | -0.564570698 |
| C | 0.609386656  | 1.515166615  | -0.910654984 |
| H | 0.524653966  | 2.563037228  | -1.113826196 |
| C | 1.811386561  | 0.912794813  | -1.022252063 |
| H | 2.676330749  | 1.482607916  | -1.300570106 |
| C | 1.969653052  | -0.532227522 | -0.865398576 |
| C | 3.297056593  | -1.072672780 | -0.953606978 |
| C | 3.535231468  | -2.493992657 | -1.439298235 |
| H | 4.441152543  | -2.908395277 | -1.014601864 |
| H | 2.714074597  | -3.185023541 | -1.292726779 |
| H | 3.689957921  | -2.394553188 | -2.508817590 |
| O | 2.774365771  | -2.009763883 | 1.674370003  |
| H | 2.001095250  | -2.656235761 | 1.706694632  |
| H | 2.607380610  | -1.332989124 | 2.336386570  |
| O | 0.630637012  | -3.632982338 | 1.669406368  |
| H | -0.154697869 | -3.309485422 | 1.187768065  |
| H | 0.758200828  | -4.523030948 | 1.361542798  |
| O | 2.612404735  | 3.728962825  | 0.445513247  |
| H | 0.893732107  | 3.891174601  | 0.808404721  |
| H | 3.165466050  | 4.484915798  | 0.570629772  |
| O | 4.172817423  | 1.547698464  | 1.081887487  |
| H | 3.125706217  | 2.953072421  | 0.681437874  |
| H | 5.073198193  | 1.800415706  | 1.230191686  |
| O | -0.035183534 | 3.994801704  | 1.026631724  |
| H | -0.133867191 | 3.697720390  | 1.919437274  |
| H | -1.224808085 | 3.162102292  | 0.047610993  |
| H | 2.879706790  | -1.562698824 | 0.764806342  |
| O | 4.310043429  | -0.370606395 | -0.795646850 |
| H | 4.204969624  | 0.914918904  | 0.355086742  |

## Path2-S<sub>0</sub>-14

|   |              |              |              |
|---|--------------|--------------|--------------|
| C | 0.786490253  | -1.261076375 | -0.651547450 |
| H | 0.820566225  | -2.331547000 | -0.572020624 |
| C | -0.461125995 | -0.679880495 | -0.461354755 |
| C | -1.594439992 | -1.508284390 | -0.112285847 |
| O | -1.479100011 | -2.714043666 | 0.176905503  |
| C | -2.902164554 | -0.841392170 | -0.085126753 |
| C | -4.085812021 | -1.612085455 | 0.075869588  |
| H | -3.988732475 | -2.676903615 | 0.156566406  |
| C | -5.320824903 | -1.009674266 | 0.120153947  |
| H | -6.215427988 | -1.597412402 | 0.232523302  |
| C | -5.412677214 | 0.399064729  | 0.026855577  |
| H | -6.379591471 | 0.871964560  | 0.069692715  |
| C | -4.278260197 | 1.163298856  | -0.111287914 |
| H | -4.345026649 | 2.231537771  | -0.179330042 |
| C | -2.991832146 | 0.549569623  | -0.179798739 |
| C | -1.806676354 | 1.354148451  | -0.351447866 |
| O | -2.000154807 | 2.697748944  | -0.344907126 |
| C | -0.607757192 | 0.765270880  | -0.564735182 |
| C | 0.598163981  | 1.514694023  | -0.909210309 |
| H | 0.515983343  | 2.561952664  | -1.117243941 |
| C | 1.802873988  | 0.916909288  | -1.014475644 |
| H | 2.662761035  | 1.490412762  | -1.301923636 |
| C | 1.960755555  | -0.526411035 | -0.857757490 |
| C | 3.294778665  | -1.070044875 | -1.002638690 |
| C | 3.536855666  | -2.494758028 | -1.450351356 |
| H | 4.441906912  | -2.890304464 | -1.003261516 |
| H | 2.713049623  | -3.175482237 | -1.285135985 |
| H | 3.696813751  | -2.419534275 | -2.518297255 |
| O | 2.760193600  | -2.012274278 | 1.702704995  |
| H | 1.972229679  | -2.657994228 | 1.694442956  |
| H | 2.613418718  | -1.315755043 | 2.347085179  |
| O | 0.666961553  | -3.606183146 | 1.655074111  |
| H | -0.145734150 | -3.292403236 | 1.201738873  |
| H | 0.765099204  | -4.513111399 | 1.386079308  |
| O | 2.608462068  | 3.746881893  | 0.436693320  |
| H | 0.876947303  | 3.900325812  | 0.808135597  |
| H | 3.164591425  | 4.500171507  | 0.565956449  |
| O | 4.178216671  | 1.546987440  | 1.104123350  |
| H | 3.113880370  | 2.969456728  | 0.678429030  |
| H | 5.077184199  | 1.814313017  | 1.235271698  |
| O | -0.047977177 | 4.014938529  | 1.034634826  |
| H | -0.144111645 | 3.701684034  | 1.922166045  |
| H | -1.254164860 | 3.157664649  | 0.043014275  |
| H | 2.821611663  | -1.561151102 | 0.829491635  |
| O | 4.301412670  | -0.382403181 | -0.812194471 |
| H | 4.202543966  | 0.942802618  | 0.357176771  |



## Path2-S<sub>0</sub>-17

|   |              |              |              |
|---|--------------|--------------|--------------|
| C | 0.789336078  | -1.259415007 | -0.652084523 |
| H | 0.819972382  | -2.330568096 | -0.588858230 |
| C | -0.461550493 | -0.678291084 | -0.451687481 |
| C | -1.584901789 | -1.510701746 | -0.101653265 |
| O | -1.457521718 | -2.719503331 | 0.190072570  |
| C | -2.892173714 | -0.848825793 | -0.077071488 |
| C | -4.079000922 | -1.618363519 | 0.081805312  |
| H | -3.984573163 | -2.683660044 | 0.159877596  |
| C | -5.313747845 | -1.015949752 | 0.121529002  |
| H | -6.208802954 | -1.603343214 | 0.230924374  |
| C | -5.407435343 | 0.394063683  | 0.026438903  |
| H | -6.373219384 | 0.869535208  | 0.063941074  |
| C | -4.274435986 | 1.156606790  | -0.111604497 |
| H | -4.339526968 | 2.224468428  | -0.184244305 |
| C | -2.986647887 | 0.543286305  | -0.179223238 |
| C | -1.811833293 | 1.351613734  | -0.361834032 |
| O | -2.006072136 | 2.697363449  | -0.385300704 |
| C | -0.610039216 | 0.762728077  | -0.564214715 |
| C | 0.592603127  | 1.513838529  | -0.907297042 |
| H | 0.508815390  | 2.560675235  | -1.116481983 |
| C | 1.798502550  | 0.917817943  | -1.010178588 |
| H | 2.654832722  | 1.495021049  | -1.299022771 |
| C | 1.956358151  | -0.525910158 | -0.859861149 |
| C | 3.293209242  | -1.074743673 | -1.027884054 |
| C | 3.531811390  | -2.503701573 | -1.462588945 |
| H | 4.433025555  | -2.883742957 | -0.995413897 |
| H | 2.705570665  | -3.176899093 | -1.280812194 |
| H | 3.700591330  | -2.461996225 | -2.531841145 |
| O | 2.725297710  | -2.016263910 | 1.727645076  |
| H | 1.923877214  | -2.667136670 | 1.711199920  |
| H | 2.602443111  | -1.325889910 | 2.383181767  |
| O | 0.687743735  | -3.578031890 | 1.643965077  |
| H | -0.136790638 | -3.266111879 | 1.202924907  |
| H | 0.768576719  | -4.497364994 | 1.413810053  |
| O | 2.613892935  | 3.761368734  | 0.429231877  |
| H | 0.863470207  | 3.913451286  | 0.811864503  |
| H | 3.174792915  | 4.510152076  | 0.566671288  |
| O | 4.188138586  | 1.538269626  | 1.130723699  |
| H | 3.108772433  | 2.981936368  | 0.682835119  |
| H | 5.086298801  | 1.815667214  | 1.248886142  |
| O | -0.058199830 | 4.033180988  | 1.047459061  |
| H | -0.148477087 | 3.705623139  | 1.930582800  |
| H | -1.282580678 | 3.160895657  | 0.037443154  |
| H | 2.760278210  | -1.552356658 | 0.864209430  |
| O | 4.296534106  | -0.387978285 | -0.840313707 |
| H | 4.203821913  | 0.960084447  | 0.364917535  |

## Path2-S<sub>0</sub>-20

|   |              |              |              |
|---|--------------|--------------|--------------|
| C | 0.793107085  | -1.259166188 | -0.654785296 |
| H | 0.820248274  | -2.331008298 | -0.606150578 |
| C | -0.460681482 | -0.676309707 | -0.443267471 |
| C | -1.576986964 | -1.509301273 | -0.090839806 |
| O | -1.440671392 | -2.721032976 | 0.205268635  |
| C | -2.882848166 | -0.851762642 | -0.070565960 |
| C | -4.073073983 | -1.620766269 | 0.085778050  |
| H | -3.980752752 | -2.686534678 | 0.161770195  |
| C | -5.306955644 | -1.017859198 | 0.119606152  |
| H | -6.202894320 | -1.604584817 | 0.224493979  |
| C | -5.401249261 | 0.393723381  | 0.023005090  |
| H | -6.366482851 | 0.870576168  | 0.056377775  |
| C | -4.269277143 | 1.154855081  | -0.115113185 |
| H | -4.331662855 | 2.222465403  | -0.191046388 |
| C | -2.979993964 | 0.541289868  | -0.181293532 |
| C | -1.812787092 | 1.350874061  | -0.372535934 |
| O | -2.005986160 | 2.698093576  | -0.422456162 |
| C | -0.608336233 | 0.760573532  | -0.564676412 |
| C | 0.592000854  | 1.512651743  | -0.905909476 |
| H | 0.506086733  | 2.559926730  | -1.111417895 |
| C | 1.798447818  | 0.917095891  | -1.009375312 |
| H | 2.654158857  | 1.496754750  | -1.294066597 |
| C | 1.953563708  | -0.527117647 | -0.865397407 |
| C | 3.293551043  | -1.081572520 | -1.050147694 |
| C | 3.525402529  | -2.516385438 | -1.471065915 |
| H | 4.422058436  | -2.890168465 | -0.990954462 |
| H | 2.695897078  | -3.182320477 | -1.278071882 |
| H | 3.699663958  | -2.501610137 | -2.540506062 |
| O | 2.682539395  | -2.020956405 | 1.746820063  |
| H | 1.868171625  | -2.682632572 | 1.730576322  |
| H | 2.585480360  | -1.348641340 | 2.424094624  |
| O | 0.689250239  | -3.552564023 | 1.643420469  |
| H | -0.134711049 | -3.238911941 | 1.190208842  |
| H | 0.768970834  | -4.477830210 | 1.438022447  |
| O | 2.624137563  | 3.771338286  | 0.427459361  |
| H | 0.853187547  | 3.928520190  | 0.818592108  |
| H | 3.189849601  | 4.515390814  | 0.572520729  |
| O | 4.198521573  | 1.526893342  | 1.154753924  |
| H | 3.108626126  | 2.990105795  | 0.693419622  |
| H | 5.096716809  | 1.806848289  | 1.268614981  |
| O | -0.066472358 | 4.045434082  | 1.062097390  |
| H | -0.148826653 | 3.708750349  | 1.942663303  |
| H | -1.305619770 | 3.166469857  | 0.031598344  |
| H | 2.692856325  | -1.539607407 | 0.894586692  |
| O | 4.293365773  | -0.393907267 | -0.868963823 |
| H | 4.208201675  | 0.966717006  | 0.376979773  |

## Path2-S<sub>0</sub>-23

|   |              |              |              |
|---|--------------|--------------|--------------|
| C | 0.800226884  | -1.259127860 | -0.661112112 |
| H | 0.823800868  | -2.331442260 | -0.630394818 |
| C | -0.457044712 | -0.672481994 | -0.433991296 |
| C | -1.564172853 | -1.502649192 | -0.073744159 |
| O | -1.414448172 | -2.719656199 | 0.234127836  |
| C | -2.866964858 | -0.852575585 | -0.061990811 |
| C | -4.062813634 | -1.620388706 | 0.090854912  |
| H | -3.972956077 | -2.686573567 | 0.166557812  |
| C | -5.295048044 | -1.017393702 | 0.113279689  |
| H | -6.192547476 | -1.603255487 | 0.210371164  |
| C | -5.390569882 | 0.396584081  | 0.013174867  |
| H | -6.355722720 | 0.873782167  | 0.041688630  |
| C | -4.260252486 | 1.155956923  | -0.125225992 |
| H | -4.319868467 | 2.223291062  | -0.206257294 |
| C | -2.968040538 | 0.542406357  | -0.187922671 |
| C | -1.810286698 | 1.351242336  | -0.390465822 |
| O | -1.999390908 | 2.699600704  | -0.473951347 |
| C | -0.601499628 | 0.758418839  | -0.568966108 |
| C | 0.596957086  | 1.510732719  | -0.906093085 |
| H | 0.510106038  | 2.560005858  | -1.099993302 |
| C | 1.803246201  | 0.914210240  | -1.013278518 |
| H | 2.661048274  | 1.495665143  | -1.287203068 |
| C | 1.951595656  | -0.530500494 | -0.881721699 |
| C | 3.293986794  | -1.096064558 | -1.078425090 |
| C | 3.513866121  | -2.539222294 | -1.480034511 |
| H | 4.403452342  | -2.911280415 | -0.986372723 |
| H | 2.677908120  | -3.192548077 | -1.273525984 |
| H | 3.692428120  | -2.555764999 | -2.549171509 |
| O | 2.607024701  | -2.029045504 | 1.772689332  |
| H | 1.747017213  | -2.724219432 | 1.749014825  |
| H | 2.555554852  | -1.393913068 | 2.487417561  |
| O | 0.669697129  | -3.508748967 | 1.652259295  |
| H | -0.151958810 | -3.193063104 | 1.161312912  |
| H | 0.764687716  | -4.438758725 | 1.472452364  |
| O | 2.641724880  | 3.782336801  | 0.436214990  |
| H | 0.840484149  | 3.953078370  | 0.831263564  |
| H | 3.216842001  | 4.518766341  | 0.585070940  |
| O | 4.213006006  | 1.507673042  | 1.185495211  |
| H | 3.113067919  | 2.997997670  | 0.714818904  |
| H | 5.112850661  | 1.780264181  | 1.305593554  |
| O | -0.077719617 | 4.057190136  | 1.084160266  |
| H | -0.145555760 | 3.713048856  | 1.963281070  |
| H | -1.333106056 | 3.174478594  | 0.021571151  |
| H | 2.583512403  | -1.512328553 | 0.946593877  |
| O | 4.291408384  | -0.407621330 | -0.909458017 |
| H | 4.219423175  | 0.964057388  | 0.397584255  |

## Path2-S<sub>0</sub>-26

|   |              |              |              |
|---|--------------|--------------|--------------|
| C | 0.805424061  | -1.258562318 | -0.665423145 |
| H | 0.827200790  | -2.330867452 | -0.640062415 |
| C | -0.457216249 | -0.670102014 | -0.430929975 |
| C | -1.556854908 | -1.497770326 | -0.064622659 |
| O | -1.394190431 | -2.721856936 | 0.254899051  |
| C | -2.857601701 | -0.855213793 | -0.058339245 |
| C | -4.058043783 | -1.622174526 | 0.093144366  |
| H | -3.969461681 | -2.688270697 | 0.169157747  |
| C | -5.289337052 | -1.019598355 | 0.109962693  |
| H | -6.187548338 | -1.605048212 | 0.203803681  |
| C | -5.386508870 | 0.396425595  | 0.007829457  |
| H | -6.352305664 | 0.872466315  | 0.034636997  |
| C | -4.257812963 | 1.155114240  | -0.130741199 |
| H | -4.316921987 | 2.222284736  | -0.213934241 |
| C | -2.962260203 | 0.541986503  | -0.191953183 |
| C | -1.811407744 | 1.350488317  | -0.398293993 |
| O | -1.997248597 | 2.698918796  | -0.492089683 |
| C | -0.598586381 | 0.756339955  | -0.572579758 |
| C | 0.598059966  | 1.509918272  | -0.907503453 |
| H | 0.511388277  | 2.560405513  | -1.094574384 |
| C | 1.804555841  | 0.913181117  | -1.018405246 |
| H | 2.663765536  | 1.495267164  | -1.285980933 |
| C | 1.947629277  | -0.530884867 | -0.895649147 |
| C | 3.293552683  | -1.102222424 | -1.088706719 |
| C | 3.508730276  | -2.547804030 | -1.483358819 |
| H | 4.395614068  | -2.920038499 | -0.985415876 |
| H | 2.670351834  | -3.196463401 | -1.272431974 |
| H | 3.687917927  | -2.573870730 | -2.552263672 |
| O | 2.582047058  | -2.029403243 | 1.784188708  |
| H | 1.641792529  | -2.780542958 | 1.743946001  |
| H | 2.546211392  | -1.410058694 | 2.510076772  |
| O | 0.663482398  | -3.480233431 | 1.656131650  |
| H | -0.170493602 | -3.159607232 | 1.140235845  |
| H | 0.771235708  | -4.412582618 | 1.485967541  |
| O | 2.646190003  | 3.785909282  | 0.443173579  |
| H | 0.834199609  | 3.962268951  | 0.836926374  |
| H | 3.225533494  | 4.519468384  | 0.590657131  |
| O | 4.216562019  | 1.502203074  | 1.194584778  |
| H | 3.113942744  | 3.000352646  | 0.724249329  |
| H | 5.117632868  | 1.767518535  | 1.321534008  |
| O | -0.083939326 | 4.059279968  | 1.092273490  |
| H | -0.145850292 | 3.714046392  | 1.971517306  |
| H | -1.343357384 | 3.176041429  | 0.017501676  |
| H | 2.548077996  | -1.500284114 | 0.974963085  |
| O | 4.288798032  | -0.413285911 | -0.922314151 |
| H | 4.223531283  | 0.960533729  | 0.406130780  |

## Path2-S<sub>0</sub>-29

|   |              |              |              |
|---|--------------|--------------|--------------|
| C | 0.809342783  | -1.257589431 | -0.668999288 |
| H | 0.830365751  | -2.329591743 | -0.647087904 |
| C | -0.459746527 | -0.667928317 | -0.429087516 |
| C | -1.550400808 | -1.493190424 | -0.056331923 |
| O | -1.368368454 | -2.727264202 | 0.278098513  |
| C | -2.849700455 | -0.860082827 | -0.055671237 |
| C | -4.055873527 | -1.625085382 | 0.094251979  |
| H | -3.968957063 | -2.691143653 | 0.169578925  |
| C | -5.286121999 | -1.022604929 | 0.107200431  |
| H | -6.185101793 | -1.607513559 | 0.198938974  |
| C | -5.385346268 | 0.395722927  | 0.004323116  |
| H | -6.351848137 | 0.870493220  | 0.030492209  |
| C | -4.258175015 | 1.153524031  | -0.134153862 |
| H | -4.317061007 | 2.220771464  | -0.218130472 |
| C | -2.959038979 | 0.540642260  | -0.195288379 |
| C | -1.815332609 | 1.349304802  | -0.402622665 |
| O | -1.997830475 | 2.697314521  | -0.500578229 |
| C | -0.598181301 | 0.754002400  | -0.575900732 |
| C | 0.596135348  | 1.509347819  | -0.909002999 |
| H | 0.509796930  | 2.560715908  | -1.090698949 |
| C | 1.803102641  | 0.912980395  | -1.023839764 |
| H | 2.663444992  | 1.495573044  | -1.285891301 |
| C | 1.941634783  | -0.529925484 | -0.909088477 |
| C | 3.291995579  | -1.105556008 | -1.095674221 |
| C | 3.505088267  | -2.551689879 | -1.486998436 |
| H | 4.390315459  | -2.923832462 | -0.986487550 |
| H | 2.665492606  | -3.197695352 | -1.273584231 |
| H | 3.684258439  | -2.581949589 | -2.555788998 |
| O | 2.592885064  | -2.019175364 | 1.792308467  |
| H | 1.533745208  | -2.855041658 | 1.731427196  |
| H | 2.546985652  | -1.409491332 | 2.520835830  |
| O | 0.652089143  | -3.464383858 | 1.657929821  |
| H | -0.203367613 | -3.123295946 | 1.108281445  |
| H | 0.783185329  | -4.394176230 | 1.491228700  |
| O | 2.646211080  | 3.787348220  | 0.447864697  |
| H | 0.829147686  | 3.966553683  | 0.840864025  |
| H | 3.227727791  | 4.519475369  | 0.594567343  |
| O | 4.216380554  | 1.501633674  | 1.197805044  |
| H | 3.112695335  | 3.001261847  | 0.729953363  |
| H | 5.118568284  | 1.760149000  | 1.330285727  |
| O | -0.089300916 | 4.058812837  | 1.096798945  |
| H | -0.147972603 | 3.713645736  | 1.976395643  |
| H | -1.349882028 | 3.175719208  | 0.015860358  |
| H | 2.536779776  | -1.488496680 | 0.995224065  |
| O | 4.284349238  | -0.415704474 | -0.928524411 |
| H | 4.224067531  | 0.957987169  | 0.411416625  |

## Path2-S<sub>0</sub>-32

|   |              |              |              |
|---|--------------|--------------|--------------|
| C | 0.812674673  | -1.256268250 | -0.673629017 |
| H | 0.833432598  | -2.327519406 | -0.654456428 |
| C | -0.461728929 | -0.664327145 | -0.427918769 |
| C | -1.542059975 | -1.486037651 | -0.046739576 |
| O | -1.333960916 | -2.733302813 | 0.307174462  |
| C | -2.840920034 | -0.865178158 | -0.053279789 |
| C | -4.054506186 | -1.626677216 | 0.093271629  |
| H | -3.970878786 | -2.692779218 | 0.166676357  |
| C | -5.283240317 | -1.022993345 | 0.102283920  |
| H | -6.183370325 | -1.606981403 | 0.191450516  |
| C | -5.384507892 | 0.397712550  | -0.000121791 |
| H | -6.351520788 | 0.871585918  | 0.025839524  |
| C | -4.258302086 | 1.153858804  | -0.137886107 |
| H | -4.316620362 | 2.221384622  | -0.221493261 |
| C | -2.955906731 | 0.540140447  | -0.199207005 |
| C | -1.819326315 | 1.349305225  | -0.406244133 |
| O | -1.998185924 | 2.696260527  | -0.505024307 |
| C | -0.597516607 | 0.752950422  | -0.579517844 |
| C | 0.594234014  | 1.510081217  | -0.910508153 |
| H | 0.508399190  | 2.562467082  | -1.085957426 |
| C | 1.801470912  | 0.913996728  | -1.029570404 |
| H | 2.663129528  | 1.496874514  | -1.285513278 |
| C | 1.935588325  | -0.527813395 | -0.922213247 |
| C | 3.290007069  | -1.108087206 | -1.103145415 |
| C | 3.500922732  | -2.554103378 | -1.492519697 |
| H | 4.384554443  | -2.926592677 | -0.989879502 |
| H | 2.660255561  | -3.197742798 | -1.277519796 |
| H | 3.680252683  | -2.586402097 | -2.561221753 |
| O | 2.614907172  | -2.008613652 | 1.798539857  |
| H | 1.460519290  | -2.909395792 | 1.722038914  |
| H | 2.549771776  | -1.405158317 | 2.528442636  |
| O | 0.621057173  | -3.467771232 | 1.659945044  |
| H | -0.280210261 | -3.079798841 | 1.047464893  |
| H | 0.787445523  | -4.387781874 | 1.487246081  |
| O | 2.646401579  | 3.787487627  | 0.454372668  |
| H | 0.825989678  | 3.969521754  | 0.846637698  |
| H | 3.229787036  | 4.518317048  | 0.601023327  |
| O | 4.215459648  | 1.501204575  | 1.200435293  |
| H | 3.112020338  | 3.000839367  | 0.736741929  |
| H | 5.118937671  | 1.751903789  | 1.338875184  |
| O | -0.093095433 | 4.057160761  | 1.102120854  |
| H | -0.149492572 | 3.712594975  | 1.982256995  |
| H | -1.353750589 | 3.175861604  | 0.015818964  |
| H | 2.531665347  | -1.476331392 | 1.011043163  |
| O | 4.279217537  | -0.417245598 | -0.932659799 |
| H | 4.223980454  | 0.954333687  | 0.416925070  |

## Path2-S<sub>0</sub>-35

|   |              |              |              |
|---|--------------|--------------|--------------|
| C | 0.815571040  | -1.254698223 | -0.678445223 |
| H | 0.836585473  | -2.325073951 | -0.660586798 |
| C | -0.462673698 | -0.660945972 | -0.427188856 |
| C | -1.533486658 | -1.477748085 | -0.038130990 |
| O | -1.303267159 | -2.742365587 | 0.332140721  |
| C | -2.833368357 | -0.871340025 | -0.050847195 |
| C | -4.053441904 | -1.629738924 | 0.091509772  |
| H | -3.972838092 | -2.695837794 | 0.162324639  |
| C | -5.281044236 | -1.024899235 | 0.097452934  |
| H | -6.181911277 | -1.608547222 | 0.184195127  |
| C | -5.384917211 | 0.397594565  | -0.003601542 |
| H | -6.352463729 | 0.870375832  | 0.022692879  |
| C | -4.259576192 | 1.152575920  | -0.140514070 |
| H | -4.317769031 | 2.220443766  | -0.222927977 |
| C | -2.954518811 | 0.538325977  | -0.202361024 |
| C | -1.823857311 | 1.348928863  | -0.408280952 |
| O | -2.000752634 | 2.694085318  | -0.505593810 |
| C | -0.597706777 | 0.752557952  | -0.582509336 |
| C | 0.591283994  | 1.512168112  | -0.911700099 |
| H | 0.505120878  | 2.565307864  | -1.081669751 |
| C | 1.798935349  | 0.916939287  | -1.034155836 |
| H | 2.661237328  | 1.500510686  | -1.285279350 |
| C | 1.930454379  | -0.523974408 | -0.932284628 |
| C | 3.288301715  | -1.107336171 | -1.110324080 |
| C | 3.497899198  | -2.552658914 | -1.499418740 |
| H | 4.380572332  | -2.925305586 | -0.995535671 |
| H | 2.656937445  | -3.195101574 | -1.283440284 |
| H | 3.677449330  | -2.585220593 | -2.568053649 |
| O | 2.633605676  | -1.999571013 | 1.800179889  |
| H | 1.429883918  | -2.940818337 | 1.718607295  |
| H | 2.551199882  | -1.402317381 | 2.531970984  |
| O | 0.610099441  | -3.479458689 | 1.667225407  |
| H | -0.387347700 | -3.029646374 | 0.968508208  |
| H | 0.790937432  | -4.389726971 | 1.479931888  |
| O | 2.643778209  | 3.788624972  | 0.460677132  |
| H | 0.821492999  | 3.971829310  | 0.852761829  |
| H | 3.228087848  | 4.518772595  | 0.607837055  |
| O | 4.212979833  | 1.502951712  | 1.201863780  |
| H | 3.109464555  | 3.001719098  | 0.742767665  |
| H | 5.117324691  | 1.747800639  | 1.345104230  |
| O | -0.098437504 | 4.054789740  | 1.107368128  |
| H | -0.152985392 | 3.711134081  | 1.988127042  |
| H | -1.357916934 | 3.175593640  | 0.017058134  |
| H | 2.528348273  | -1.467173028 | 1.019369999  |
| O | 4.274360293  | -0.414903761 | -0.936310254 |
| H | 4.222533340  | 0.953555511  | 0.420627784  |

## Path2-S<sub>0</sub>-38

|   |              |              |              |
|---|--------------|--------------|--------------|
| C | 0.856438600  | -1.246563398 | -0.708974348 |
| H | 0.910631917  | -2.315765644 | -0.680926038 |
| C | -0.424448721 | -0.653313548 | -0.428381600 |
| C | -1.521662631 | -1.434153563 | -0.068095335 |
| O | -1.395432648 | -2.751012433 | 0.190793469  |
| C | -2.798368754 | -0.861080760 | -0.025329995 |
| C | -3.993263291 | -1.659224718 | 0.133564592  |
| H | -3.898190015 | -2.725985387 | 0.197800315  |
| C | -5.222202790 | -1.069490456 | 0.143839590  |
| H | -6.112209479 | -1.668070238 | 0.224394554  |
| C | -5.346555353 | 0.355583604  | 0.046079868  |
| H | -6.320591701 | 0.810826823  | 0.083729098  |
| C | -4.239456497 | 1.132076647  | -0.098885489 |
| H | -4.308182741 | 2.197554198  | -0.179867358 |
| C | -2.929819685 | 0.538044804  | -0.173499862 |
| C | -1.804730549 | 1.340304184  | -0.393026101 |
| O | -1.987647470 | 2.679169462  | -0.489292115 |
| C | -0.567046162 | 0.754237354  | -0.576143794 |
| C | 0.603760141  | 1.527222644  | -0.926000458 |
| H | 0.505612136  | 2.583503026  | -1.063797705 |
| C | 1.810081462  | 0.939263391  | -1.094062638 |
| H | 2.669116745  | 1.532097456  | -1.336648744 |
| C | 1.947358253  | -0.500826788 | -1.005691254 |
| C | 3.309672062  | -1.081415238 | -1.197615953 |
| C | 3.521321985  | -2.525379409 | -1.590837052 |
| H | 4.408572365  | -2.894075058 | -1.093072711 |
| H | 2.685653476  | -3.168139834 | -1.357596406 |
| H | 3.687151678  | -2.565278426 | -2.661985923 |
| O | 2.817270934  | -1.931316843 | 1.785776049  |
| H | 1.484675263  | -3.077791328 | 1.748019131  |
| H | 2.663180832  | -1.379890220 | 2.542058652  |
| O | 0.668627096  | -3.578889802 | 1.703605925  |
| H | -0.643978861 | -2.932690921 | 0.765706626  |
| H | 0.898273025  | -4.456859540 | 1.436006800  |
| O | 2.654728585  | 3.810910499  | 0.471645547  |
| H | 0.825648517  | 3.988376545  | 0.880577692  |
| H | 3.243668149  | 4.540459983  | 0.603498479  |
| O | 4.253365175  | 1.543541480  | 1.151661676  |
| H | 3.132500233  | 3.025531979  | 0.738867279  |
| H | 5.163251137  | 1.745432354  | 1.324408118  |
| O | -0.096571007 | 4.025647526  | 1.137895077  |
| H | -0.127156094 | 3.701298353  | 2.027319851  |
| H | -1.348374021 | 3.161490214  | 0.037041793  |
| H | 2.575910402  | -1.392445495 | 1.044065760  |
| O | 4.287741561  | -0.379199983 | -1.023205100 |
| H | 4.262709942  | 0.968821443  | 0.389900541  |



**S4-3.** Cartesian coordinates of the  $S_0$  and  $T_{RCT2}$  minima as well as transition state ( $T_{RCT2}$ -TS) and intermediate ( $T_{RCT2}$ -INT) along the reaction pathway of the first step of ES IPT in the  $T_{RCT2}$  state obtained by the CASSCF(12e/10o)/6-31G\*\* level of theory.

### **S<sub>0</sub>-Min**

|   |              |              |              |
|---|--------------|--------------|--------------|
| C | 0.691514488  | 1.272153325  | 0.099180076  |
| H | 0.645099399  | 2.324346612  | -0.107845739 |
| C | -0.493504583 | 0.523823655  | 0.107065928  |
| C | -1.791601111 | 1.203687071  | -0.150090012 |
| O | -1.854219020 | 2.367743089  | -0.439202486 |
| C | -3.038358087 | 0.391138903  | -0.017989105 |
| C | -4.263006573 | 1.018311444  | -0.125489304 |
| H | -4.292659300 | 2.076426198  | -0.300284767 |
| C | -5.440378426 | 0.284729515  | -0.008588672 |
| H | -6.389473857 | 0.782876464  | -0.086519756 |
| C | -5.385529840 | -1.089223206 | 0.205602854  |
| H | -6.293096339 | -1.658317496 | 0.294006080  |
| C | -4.152512485 | -1.730482197 | 0.301487950  |
| H | -4.091434730 | -2.789984814 | 0.458255904  |
| C | -2.976812593 | -0.992075524 | 0.197049682  |
| C | -1.664312778 | -1.689546812 | 0.290782534  |
| O | -1.609372226 | -2.892242020 | 0.312398782  |
| C | -0.444979192 | -0.848413230 | 0.358406352  |
| C | 0.787831606  | -1.447357012 | 0.637341523  |
| H | 0.832096822  | -2.496697489 | 0.851180097  |
| C | 1.933707295  | -0.698400434 | 0.641408933  |
| H | 2.868267978  | -1.180904562 | 0.851689620  |
| C | 1.907224027  | 0.676110636  | 0.352507266  |
| C | 3.204173688  | 1.475400136  | 0.273127914  |
| C | 4.017295600  | 1.414341347  | 1.564664675  |
| H | 4.892620965  | 2.045408855  | 1.461314199  |
| H | 3.435210946  | 1.767439539  | 2.409824153  |
| H | 4.355754046  | 0.404599981  | 1.776041156  |
| O | 2.085172704  | 4.843070829  | -0.272490839 |
| H | 1.150182420  | 5.007518226  | -0.346842961 |
| H | 2.455824129  | 5.103981481  | -1.101549760 |
| O | -0.765489345 | 5.075249437  | -0.634666538 |
| H | -1.140035700 | 4.201889617  | -0.634263040 |
| H | -1.304710003 | 5.592759725  | -0.056200229 |
| O | 3.192102758  | -4.126084240 | -0.324103544 |
| H | 2.281795343  | -4.236505159 | -0.591573798 |
| H | 3.503577968  | -4.995751615 | -0.124537123 |
| O | 4.863483513  | -1.779205631 | -0.453245941 |
| H | 4.308775050  | -2.556318932 | -0.455160989 |
| H | 5.754190325  | -2.093538123 | -0.470663699 |
| O | 0.444729264  | -4.551057758 | -1.001000447 |
| H | 0.131206396  | -4.547273278 | -1.892945714 |
| H | -0.219865511 | -4.101221503 | -0.489090271 |
| H | 2.942098756  | 2.506834916  | 0.087653405  |

|   |             |             |              |
|---|-------------|-------------|--------------|
| O | 3.963533933 | 1.074364867 | -0.834706380 |
| H | 4.270535712 | 0.162536974 | -0.715159197 |

### T<sub>RCT2</sub>-Min

|   |              |              |              |
|---|--------------|--------------|--------------|
| C | 0.688947359  | 1.277114621  | 0.196591172  |
| H | 0.694849596  | 2.309468826  | -0.101152897 |
| C | -0.484335100 | 0.616208914  | 0.270727563  |
| C | -1.745756083 | 1.291903077  | -0.052809342 |
| O | -1.819211944 | 2.479125825  | -0.274910824 |
| C | -2.970653965 | 0.447437307  | -0.092820060 |
| C | -4.200869913 | 1.066600244  | -0.409459251 |
| H | -4.209177790 | 2.121017711  | -0.604101630 |
| C | -5.353396715 | 0.320971038  | -0.466248232 |
| H | -6.289928737 | 0.790590043  | -0.706891321 |
| C | -5.307043699 | -1.066195910 | -0.211140547 |
| H | -6.210979248 | -1.646964644 | -0.255617112 |
| C | -4.122748011 | -1.669365389 | 0.091526669  |
| H | -4.067809887 | -2.721979319 | 0.290170213  |
| C | -2.934972051 | -0.911448131 | 0.155520414  |
| C | -1.668840826 | -1.615401978 | 0.493225461  |
| O | -1.651243116 | -2.824544951 | 0.661681406  |
| C | -0.481737272 | -0.813899920 | 0.612311090  |
| C | 0.785752796  | -1.424681439 | 1.043019465  |
| H | 0.764746714  | -2.434313164 | 1.398598673  |
| C | 1.940989832  | -0.727067410 | 0.976726621  |
| H | 2.860817464  | -1.197359360 | 1.261916989  |
| C | 1.964782197  | 0.654841579  | 0.497560343  |
| C | 3.254225823  | 1.354244168  | 0.114517974  |
| C | 4.364211880  | 1.211851186  | 1.151896091  |
| H | 5.227199943  | 1.778044796  | 0.820844085  |
| H | 4.050775571  | 1.597783355  | 2.117099905  |
| H | 4.673035410  | 0.179576236  | 1.277422888  |
| O | 2.149906402  | 4.647432270  | -0.388741081 |
| H | 1.242855892  | 4.901808630  | -0.235563909 |
| H | 2.300160624  | 4.790728965  | -1.311495235 |
| O | -0.652210975 | 5.093778986  | -0.057393204 |
| H | -1.025255795 | 4.225195419  | -0.180325982 |
| H | -0.933889379 | 5.377380722  | 0.799966783  |
| O | 3.055197121  | -4.066401662 | -0.250740059 |
| H | 2.114328841  | -4.146683031 | -0.407850129 |
| H | 3.419433611  | -4.912242217 | -0.466867118 |
| O | 4.586199180  | -1.819280806 | -1.035643316 |
| H | 4.023721850  | -2.557519095 | -0.803346786 |
| H | 5.430647598  | -2.006888042 | -0.654231395 |
| O | 0.286622161  | -4.478692218 | -0.707024906 |
| H | -0.042201381 | -4.379592057 | -1.588657963 |
| H | -0.328211473 | -4.009776087 | -0.147697207 |
| H | 3.033877707  | 2.405070543  | -0.002133139 |
| O | 3.660311999  | 0.902361845  | -1.152482991 |
| H | 3.975098440  | -0.012254305 | -1.084920498 |

**T<sub>RCT2</sub>-TS**

|   |              |              |              |
|---|--------------|--------------|--------------|
| C | 0.930724074  | 1.117541010  | 0.267728768  |
| H | 1.060176413  | 2.105145452  | -0.130417589 |
| C | -0.387606666 | 0.589805415  | 0.332726253  |
| C | -1.511928183 | 1.409728175  | -0.076033695 |
| O | -1.394207830 | 2.583883351  | -0.419977524 |
| C | -2.828648191 | 0.756569677  | -0.067483284 |
| C | -3.974859459 | 1.520444751  | -0.431371367 |
| H | -3.834945396 | 2.552610796  | -0.687174875 |
| C | -5.213669087 | 0.940938650  | -0.452969568 |
| H | -6.080407090 | 1.516472498  | -0.726075626 |
| C | -5.358524654 | -0.434603212 | -0.114958393 |
| H | -6.336267254 | -0.883936999 | -0.133837154 |
| C | -4.274601106 | -1.171974431 | 0.227041435  |
| H | -4.360498617 | -2.210133059 | 0.484242369  |
| C | -2.978747096 | -0.581832227 | 0.262693873  |
| C | -1.832649565 | -1.408781578 | 0.628837317  |
| O | -1.943073336 | -2.647664323 | 0.785898220  |
| C | -0.567324817 | -0.745381097 | 0.730082815  |
| C | 0.565702486  | -1.471005975 | 1.219631954  |
| H | 0.404777872  | -2.451029545 | 1.626001647  |
| C | 1.812639663  | -0.924270466 | 1.189802725  |
| H | 2.642277515  | -1.485181257 | 1.581312364  |
| C | 2.015619758  | 0.390444749  | 0.645987258  |
| C | 3.403132771  | 0.897608177  | 0.349904630  |
| C | 4.488325044  | 0.611988440  | 1.379424983  |
| H | 5.447022088  | 0.979793616  | 1.028789196  |
| H | 4.246240502  | 1.131699512  | 2.299210106  |
| H | 4.586349774  | -0.444429438 | 1.601661097  |
| O | 2.959014187  | 4.107556999  | -0.614856644 |
| H | 2.069028073  | 4.437573929  | -0.479781309 |
| H | 3.091554868  | 4.135507882  | -1.552517041 |
| O | 0.241364999  | 4.845254479  | -0.321345851 |
| H | -0.297436022 | 4.055209071  | -0.409746152 |
| H | 0.017874788  | 5.206547642  | 0.525535176  |
| O | 2.158049413  | -3.901237457 | -0.841728954 |
| H | 1.111301814  | -3.748194861 | -0.872449001 |
| H | 2.351767868  | -4.677176344 | -1.355967185 |
| O | 3.947128348  | -2.294194267 | -1.107176507 |
| H | 2.989430491  | -3.029869095 | -0.969283024 |
| H | 4.690228146  | -2.596576429 | -0.596029957 |
| O | -0.343315400 | -3.823913093 | -0.969502579 |
| H | -0.739211335 | -3.460564240 | -1.752293809 |
| H | -0.883286715 | -3.476546790 | -0.225086857 |
| H | 3.386214667  | 1.950775971  | 0.117926674  |
| O | 3.733131519  | 0.211732997  | -0.879476406 |
| H | 3.847562501  | -1.242368134 | -0.974963344 |

## T<sub>RCT2</sub>-INT

|   |              |              |              |
|---|--------------|--------------|--------------|
| C | 1.018802997  | 1.096753023  | 0.220216528  |
| H | 1.191286337  | 2.110280376  | -0.084708215 |
| C | -0.312549336 | 0.614906339  | 0.243699307  |
| C | -1.421467549 | 1.508979269  | -0.122142236 |
| O | -1.244003091 | 2.662939945  | -0.467604205 |
| C | -2.781349551 | 0.948914991  | -0.060122871 |
| C | -3.884847398 | 1.789853752  | -0.351492761 |
| H | -3.689933124 | 2.815155939  | -0.599651810 |
| C | -5.160495410 | 1.291869194  | -0.315292018 |
| H | -6.001301019 | 1.925586800  | -0.532985801 |
| C | -5.373427344 | -0.073992524 | 0.009402837  |
| H | -6.377742367 | -0.458829399 | 0.037641942  |
| C | -4.326668337 | -0.890678908 | 0.283293045  |
| H | -4.474292083 | -1.923451761 | 0.531838206  |
| C | -2.995758186 | -0.385648257 | 0.255880119  |
| C | -1.883299807 | -1.250681948 | 0.537561761  |
| O | -2.104573882 | -2.532876221 | 0.764834975  |
| C | -0.561642961 | -0.712220718 | 0.591065560  |
| C | 0.533003507  | -1.530261973 | 0.986817672  |
| H | 0.343383480  | -2.536446326 | 1.302956357  |
| C | 1.806723610  | -1.033694944 | 0.977568648  |
| H | 2.620341901  | -1.672021367 | 1.268574224  |
| C | 2.069663202  | 0.303821399  | 0.567246244  |
| C | 3.491529058  | 0.812495017  | 0.467621983  |
| C | 4.304482787  | 0.721725217  | 1.760099993  |
| H | 5.313691329  | 1.078778544  | 1.590157170  |
| H | 3.843928445  | 1.345271016  | 2.517064256  |
| H | 4.354268407  | -0.293249867 | 2.136223778  |
| O | 3.291470461  | 4.021942713  | -0.818266230 |
| H | 2.398061188  | 4.331135180  | -0.686608137 |
| H | 3.438728381  | 4.064395524  | -1.748489241 |
| O | 0.603048821  | 4.758533419  | -0.509920919 |
| H | 0.000808954  | 4.022436155  | -0.594995384 |
| H | 0.345189406  | 5.205746833  | 0.279514598  |
| O | 1.648269622  | -4.223919964 | -0.793058401 |
| H | -0.033024127 | -4.122767061 | -0.838907450 |
| H | 2.043513559  | -5.037471870 | -1.062103184 |
| O | 4.037466001  | -2.726915231 | -1.235567095 |
| H | 2.319350534  | -3.552467252 | -0.892795591 |
| H | 4.846551482  | -3.091410011 | -0.915609538 |
| O | -0.999697401 | -4.045556973 | -0.871410580 |
| H | -1.234315104 | -3.841258026 | -1.763440689 |
| H | -1.648266573 | -3.158347277 | 0.101368479  |
| H | 3.502581739  | 1.837439709  | 0.121392906  |
| O | 4.227258692  | 0.019282226  | -0.494785890 |
| H | 4.087079792  | -1.788778733 | -1.068752990 |

**S4-4.** Cartesian coordinates of the  $S_0$  and  $T_{RCT2}$  minima as well as transition state ( $T_{RCT2}$ -TS) and intermediate ( $T_{RCT2}$ -INT) along the reaction pathway of the first step of ESIPT in the  $T_{RCT2}$  state for the isolated 2-HEAQ (without water molecules). The results were obtained by the CASSCF(12e/10o)/6-31G\*\* and CASSCF(12e/10o)/6-31G\*\*/PCM levels of theory.

### **$S_0$ -Min (gas phase)**

|   |              |              |              |
|---|--------------|--------------|--------------|
| C | 1.604452639  | -0.908534624 | -0.071918893 |
| H | 1.732488885  | -1.974528436 | -0.092918322 |
| C | 0.318629609  | -0.403564400 | -0.046767023 |
| C | -0.831819443 | -1.357594501 | -0.064778971 |
| O | -0.657252246 | -2.539915262 | -0.109945462 |
| C | -2.208754965 | -0.780061463 | -0.029228331 |
| C | -3.309043146 | -1.649676667 | -0.036700908 |
| H | -3.130499451 | -2.707350828 | -0.068671282 |
| C | -4.580897359 | -1.142836556 | -0.004759154 |
| H | -5.425403028 | -1.808650646 | -0.010634646 |
| C | -4.789743209 | 0.243392957  | 0.036135005  |
| H | -5.792756657 | 0.630487598  | 0.061090197  |
| C | -3.723611922 | 1.102780526  | 0.044706464  |
| H | -3.864258217 | 2.166297471  | 0.075615026  |
| C | -2.416329255 | 0.596065200  | 0.013752514  |
| C | -1.271028215 | 1.552653939  | 0.023153714  |
| O | -1.451155658 | 2.734857969  | 0.053892047  |
| C | 0.107551918  | 0.978343427  | -0.002941312 |
| C | 1.204586683  | 1.836104833  | 0.014985599  |
| H | 1.039166457  | 2.895598109  | 0.053120260  |
| C | 2.495366978  | 1.315093185  | -0.018103274 |
| H | 3.325787044  | 1.998061863  | -0.006266775 |
| C | 2.713768425  | -0.065034282 | -0.068677970 |
| C | 4.113860595  | -0.666347607 | -0.034707767 |
| C | 5.101641756  | -0.003386084 | -0.988026905 |
| H | 6.044469870  | -0.536688730 | -0.952680421 |
| H | 4.730664781  | -0.017482092 | -2.007552779 |
| H | 5.296239328  | 1.029953248  | -0.715830612 |
| H | 4.026974924  | -1.708406822 | -0.314667507 |
| O | 4.620666865  | -0.701474477 | 1.279696323  |
| H | 4.747267871  | 0.200576069  | 1.593516863  |

### **$T_{RCT2}$ -Min (gas phase)**

|   |              |              |              |
|---|--------------|--------------|--------------|
| C | 1.554951976  | -0.939299153 | -0.137893582 |
| H | 1.692075782  | -2.005612900 | -0.153519979 |
| C | 0.308356293  | -0.458560168 | -0.116223506 |
| C | -0.844268100 | -1.392154162 | -0.120139433 |
| O | -0.698954551 | -2.579626369 | -0.211619626 |
| C | -2.203802707 | -0.781862264 | -0.036405087 |
| C | -3.319220828 | -1.636649810 | -0.026971512 |
| H | -3.152228850 | -2.695348226 | -0.080403775 |

|   |              |              |              |
|---|--------------|--------------|--------------|
| C | -4.582844890 | -1.117946921 | 0.048433041  |
| H | -5.435448770 | -1.773419760 | 0.055484626  |
| C | -4.772644269 | 0.271608002  | 0.116413086  |
| H | -5.769552076 | 0.670877311  | 0.175360183  |
| C | -3.696806263 | 1.116289728  | 0.107996746  |
| H | -3.822018173 | 2.180785730  | 0.159493518  |
| C | -2.393242490 | 0.598781314  | 0.032161435  |
| C | -1.249788485 | 1.560317193  | 0.023669328  |
| O | -1.429295208 | 2.753145362  | 0.074623332  |
| C | 0.082452849  | 0.998346735  | -0.072946941 |
| C | 1.259373615  | 1.886757832  | -0.109171067 |
| H | 1.080074049  | 2.943595375  | -0.109010990 |
| C | 2.509776824  | 1.370907600  | -0.139938563 |
| H | 3.354257384  | 2.034037285  | -0.172225103 |
| C | 2.737148185  | -0.076418839 | -0.151924517 |
| C | 4.109728239  | -0.684045326 | 0.030747980  |
| C | 5.196958183  | -0.044633533 | -0.826622568 |
| H | 6.128417808  | -0.578584883 | -0.680028088 |
| H | 4.936888981  | -0.081016220 | -1.879551576 |
| H | 5.365518684  | 0.993894158  | -0.557971418 |
| H | 4.045546178  | -1.731943006 | -0.234867949 |
| O | 4.475315353  | -0.697628809 | 1.394308575  |
| H | 4.623175531  | 0.206984287  | 1.691633289  |

### **T<sub>RCT2</sub>-TS (gas phase)**

|   |              |              |              |
|---|--------------|--------------|--------------|
| C | -1.629980446 | -1.004815503 | -0.126599117 |
| H | -1.752496547 | -2.066856562 | -0.237674837 |
| C | -0.318683665 | -0.497375875 | -0.029511303 |
| C | 0.848275104  | -1.407129788 | -0.075458914 |
| O | 0.712395023  | -2.599207218 | -0.161977110 |
| C | 2.197359895  | -0.780324734 | -0.025624693 |
| C | 3.333758089  | -1.609698215 | -0.066351100 |
| H | 3.184276486  | -2.670490876 | -0.126448335 |
| C | 4.598566047  | -1.065849384 | -0.032101470 |
| H | 5.465405706  | -1.700157044 | -0.063879985 |
| C | 4.754153869  | 0.334837873  | 0.043157813  |
| H | 5.741991360  | 0.759889904  | 0.069603258  |
| C | 3.666740317  | 1.151478750  | 0.083595296  |
| H | 3.790791508  | 2.217195586  | 0.142343570  |
| C | 2.361082203  | 0.599444415  | 0.051500751  |
| C | 1.189765434  | 1.420596989  | 0.093663205  |
| O | 1.296909285  | 2.758869636  | 0.102847421  |
| C | -0.125077278 | 0.882956900  | 0.079074620  |
| C | -1.246977109 | 1.746614927  | 0.124814325  |
| H | -1.096688140 | 2.800518886  | 0.245643942  |
| C | -2.493096067 | 1.230660108  | 0.028769883  |
| H | -3.349633655 | 1.874882195  | 0.041781355  |
| C | -2.703673686 | -0.159702417 | -0.114026336 |
| C | -4.141009880 | -0.622122708 | -0.263747695 |
| C | -4.800023509 | -0.980237749 | 1.070678311  |
| H | -5.819256583 | -1.309306812 | 0.906294675  |
| H | -4.244473722 | -1.771537927 | 1.560135685  |

|   |              |              |              |
|---|--------------|--------------|--------------|
| H | -4.813579490 | -0.119302960 | 1.730315215  |
| H | -4.188439307 | -1.488663260 | -0.918976952 |
| O | -4.912639481 | 0.359688086  | -0.887699084 |
| H | -2.638292081 | 3.883023255  | -0.825508830 |

### **T<sub>RCT2</sub>-INT (gas phase)**

|   |              |              |              |
|---|--------------|--------------|--------------|
| C | -1.672607044 | -0.895463792 | -0.179474366 |
| H | -1.800270950 | -1.959129224 | -0.242712867 |
| C | -0.367678254 | -0.406429257 | -0.109440113 |
| C | 0.754619531  | -1.374299552 | -0.120218149 |
| O | 0.553904781  | -2.557548491 | -0.193667842 |
| C | 2.123201202  | -0.821205873 | -0.042313979 |
| C | 3.217117908  | -1.703730181 | -0.046751692 |
| H | 3.021474010  | -2.755931480 | -0.109983848 |
| C | 4.503343126  | -1.218043480 | 0.029189415  |
| H | 5.339766168  | -1.891622474 | 0.025962170  |
| C | 4.713230200  | 0.172448505  | 0.111233323  |
| H | 5.715208589  | 0.557299331  | 0.171107881  |
| C | 3.662508301  | 1.037681601  | 0.116600871  |
| H | 3.829030660  | 2.094144275  | 0.179407968  |
| C | 2.335582284  | 0.549848992  | 0.039530290  |
| C | 1.214898829  | 1.450553586  | 0.042640739  |
| O | 1.524042982  | 2.759498267  | 0.122464834  |
| C | -0.130695541 | 0.980343172  | -0.028994831 |
| C | -1.260527735 | 1.838272824  | -0.026534034 |
| H | -1.149534236 | 2.905662727  | 0.029471000  |
| C | -2.523079901 | 1.334803604  | -0.091009457 |
| H | -3.355712594 | 2.013522205  | -0.085641288 |
| C | -2.754789182 | -0.052994325 | -0.170745406 |
| C | -4.169293939 | -0.607024599 | -0.178675917 |
| C | -4.693219680 | -0.901794223 | 1.224080038  |
| H | -5.707083337 | -1.282083024 | 1.167515107  |
| H | -4.070335433 | -1.638535226 | 1.715780002  |
| H | -4.696570992 | 0.002326664  | 1.822813477  |
| H | -4.181575317 | -1.514231697 | -0.776140588 |
| O | -5.003191916 | 0.280285917  | -0.855646946 |
| H | 0.741896062  | 3.312890402  | 0.102520235  |

### **S<sub>0</sub>-Min (PCM)**

|   |              |              |              |
|---|--------------|--------------|--------------|
| C | 1.602340116  | -0.907090383 | -0.063621970 |
| H | 1.738936766  | -1.972117462 | -0.093555792 |
| C | 0.318986224  | -0.404370331 | -0.047518550 |
| C | -0.833000054 | -1.354113716 | -0.075718382 |
| O | -0.660860467 | -2.541983906 | -0.115826042 |
| C | -2.207608164 | -0.779253092 | -0.033198478 |
| C | -3.308948116 | -1.646812622 | -0.040596550 |
| H | -3.140094086 | -2.705683068 | -0.076562909 |
| C | -4.581776222 | -1.139470904 | -0.002716248 |
| H | -5.425926437 | -1.804627671 | -0.009008587 |

|   |              |              |              |
|---|--------------|--------------|--------------|
| C | -4.788788795 | 0.246782560  | 0.043967633  |
| H | -5.790353557 | 0.635396897  | 0.073848775  |
| C | -3.719887736 | 1.104898124  | 0.052031694  |
| H | -3.867774590 | 2.166854171  | 0.087719296  |
| C | -2.413112244 | 0.598226440  | 0.013450098  |
| C | -1.264548672 | 1.548383653  | 0.021622685  |
| O | -1.442374390 | 2.735658498  | 0.061101843  |
| C | 0.109110444  | 0.977256963  | -0.009709897 |
| C | 1.202893083  | 1.828009336  | 0.000874097  |
| H | 1.043969233  | 2.889130156  | 0.025789432  |
| C | 2.496035128  | 1.310246128  | -0.022155476 |
| H | 3.325016615  | 1.994279638  | -0.020182596 |
| C | 2.711820725  | -0.065199597 | -0.050711630 |
| C | 4.109692425  | -0.668261620 | -0.036206351 |
| C | 5.093908825  | 0.003473374  | -0.985473620 |
| H | 6.037180030  | -0.530143479 | -0.962258534 |
| H | 4.715188844  | -0.006966491 | -2.001779254 |
| H | 5.286456344  | 1.034066807  | -0.704915352 |
| H | 4.020939917  | -1.708166660 | -0.321922595 |
| O | 4.616190343  | -0.706543456 | 1.284170702  |
| H | 4.790115310  | 0.194702237  | 1.581341749  |

### **T<sub>RCT2</sub>-Min (PCM)**

|   |              |              |              |
|---|--------------|--------------|--------------|
| C | 1.554791704  | -0.935121282 | -0.152741112 |
| H | 1.699169355  | -1.999497214 | -0.183919579 |
| C | 0.305522793  | -0.454256291 | -0.144281569 |
| C | -0.842288892 | -1.385105590 | -0.181677150 |
| O | -0.694048485 | -2.581172836 | -0.193030257 |
| C | -2.199801704 | -0.780921054 | -0.060445724 |
| C | -3.314627844 | -1.637163572 | -0.024757430 |
| H | -3.154667352 | -2.696308100 | -0.081902811 |
| C | -4.578598047 | -1.123243519 | 0.079912486  |
| H | -5.428458074 | -1.780758840 | 0.107083232  |
| C | -4.770329368 | 0.265676028  | 0.151531366  |
| H | -5.766263451 | 0.661907275  | 0.232978193  |
| C | -3.695251725 | 1.112455924  | 0.118158082  |
| H | -3.829748230 | 2.175167085  | 0.172269354  |
| C | -2.390725426 | 0.600505924  | 0.012130967  |
| C | -1.249870782 | 1.562034580  | -0.018470730 |
| O | -1.433267699 | 2.758273195  | 0.066983189  |
| C | 0.081005421  | 1.001896720  | -0.090484595 |
| C | 1.261073587  | 1.887179216  | -0.092957502 |
| H | 1.091550253  | 2.945011453  | -0.078996042 |
| C | 2.511772177  | 1.371406059  | -0.109845007 |
| H | 3.357723653  | 2.032634336  | -0.113172100 |
| C | 2.734694014  | -0.075008351 | -0.135009503 |
| C | 4.105225941  | -0.689684779 | 0.034545275  |
| C | 5.185022574  | -0.039040028 | -0.820754315 |
| H | 6.115227377  | -0.580682266 | -0.694020735 |
| H | 4.910242097  | -0.061917269 | -1.869709027 |



|   |             |              |              |
|---|-------------|--------------|--------------|
| H | 5.358532169 | 0.994086101  | -0.536676469 |
| H | 4.033837020 | -1.733337934 | -0.244299087 |
| O | 4.476670544 | -0.707438956 | 1.401158213  |
| H | 4.632333731 | 0.196744264  | 1.700354649  |

### T<sub>RCT2</sub>-TS (PCM)

|   |              |              |              |
|---|--------------|--------------|--------------|
| C | -1.625972050 | -1.002122129 | -0.091958700 |
| H | -1.753966898 | -2.060359340 | -0.225279437 |
| C | -0.314794929 | -0.493771610 | 0.016299908  |
| C | 0.848422866  | -1.401128685 | -0.045131322 |
| O | 0.705740418  | -2.602123318 | -0.098627961 |
| C | 2.196127960  | -0.783913752 | -0.016647446 |
| C | 3.334526671  | -1.613343092 | -0.070072333 |
| H | 3.194188357  | -2.675673468 | -0.118474501 |
| C | 4.599842799  | -1.068892354 | -0.064339129 |
| H | 5.466158196  | -1.702867230 | -0.105871208 |
| C | 4.756193858  | 0.333375570  | -0.004778298 |
| H | 5.743587359  | 0.758625313  | -0.000221998 |
| C | 3.668256039  | 1.150112674  | 0.048371879  |
| H | 3.795425280  | 2.216060691  | 0.096506225  |
| C | 2.362159232  | 0.596846853  | 0.045732686  |
| C | 1.193181564  | 1.418462431  | 0.108365908  |
| O | 1.309664150  | 2.754503289  | 0.086464818  |
| C | -0.121230356 | 0.886000579  | 0.132274728  |
| C | -1.249144122 | 1.738849791  | 0.197701192  |
| H | -1.115516505 | 2.796850666  | 0.310456194  |
| C | -2.496090723 | 1.219438492  | 0.111917940  |
| H | -3.347607991 | 1.871711662  | 0.140522262  |
| C | -2.703921765 | -0.166892465 | -0.066755488 |
| C | -4.131616725 | -0.641028693 | -0.268301397 |
| C | -4.901049044 | -0.844021853 | 1.036002993  |
| H | -5.829610413 | -1.371602362 | 0.850866745  |
| H | -4.296802208 | -1.422849919 | 1.722503680  |
| H | -5.127820863 | 0.109705244  | 1.500200176  |
| H | -4.142709005 | -1.569310476 | -0.833137862 |
| O | -4.843638176 | 0.281270883  | -1.045094094 |
| H | -2.448804148 | 3.612671880  | -1.292111102 |

### T<sub>RCT2</sub>-INT (PCM)

|   |              |              |              |
|---|--------------|--------------|--------------|
| C | -1.671555770 | -0.902943131 | -0.171630613 |
| H | -1.810479329 | -1.964760459 | -0.228207851 |
| C | -0.365480652 | -0.412950426 | -0.107129234 |
| C | 0.756696266  | -1.373071956 | -0.116415231 |
| O | 0.560291718  | -2.566108282 | -0.189650164 |
| C | 2.121004915  | -0.821335336 | -0.040503585 |
| C | 3.221121256  | -1.701015904 | -0.042107742 |
| H | 3.038053906  | -2.755271500 | -0.102248386 |
| C | 4.506600005  | -1.213494540 | 0.033509309  |
| H | 5.344309049  | -1.884642441 | 0.032869521  |
| C | 4.713221760  | 0.178586071  | 0.112449938  |

|   |              |              |              |
|---|--------------|--------------|--------------|
| H | 5.713681118  | 0.565620728  | 0.172388812  |
| C | 3.659217983  | 1.041151136  | 0.114436710  |
| H | 3.828811533  | 2.097004854  | 0.174893262  |
| C | 2.331467047  | 0.552235454  | 0.037636671  |
| C | 1.211793728  | 1.452314477  | 0.037336721  |
| O | 1.520372836  | 2.756899424  | 0.113663082  |
| C | -0.131486258 | 0.976496313  | -0.033320479 |
| C | -1.259739234 | 1.835116203  | -0.033724039 |
| H | -1.147823665 | 2.900620314  | 0.019911561  |
| C | -2.522701709 | 1.329424343  | -0.093781851 |
| H | -3.352496795 | 2.011014556  | -0.081547636 |
| C | -2.753680137 | -0.059077177 | -0.165902068 |
| C | -4.166633918 | -0.617365071 | -0.163636381 |
| C | -4.708687658 | -0.841400594 | 1.243625401  |
| H | -5.719261451 | -1.230368098 | 1.190424429  |
| H | -4.090489376 | -1.552491154 | 1.776139515  |
| H | -4.721160075 | 0.091043864  | 1.797583179  |
| H | -4.174738792 | -1.549487268 | -0.718774747 |
| O | -4.992989014 | 0.236023791  | -0.898267114 |
| H | 0.743243835  | 3.321178000  | 0.095540746  |
